# Supplementary material for: Global Transcriptome Sequencing Identifies Chlamydospore Specific Markers in Candida albicans and Candida dubliniensis
Source: PLoS One. 2013 Apr 15;8(4):e61940. doi: 10.1371/journal.pone.0061940 (PMC3626690; doi:10.1371/journal.pone.0061940)
Supplement: Table S2 — Identification of genes that were differentially regulated during chlamydospore development. The table contains the relative expression values (log2fold) for all C. albicans and C. dubliniensis genes detected in the comparative RNAseq analyses, i.e. the C. albicans nrg1Δ mutant versus C. albicans wild type, C. dubliniensis wild type versus C. albicans wild type as well as C. dubliniensis wild type versus the C. albicans nrg1Δ mutant. (XLS) [file pone.0061940.s006.xls]

## Sheet: Sheet1
C.albicans orf19ID	C.albicans Name	C.dubliniensis ID	log2fold C.albicans deltaNRG1_VS_C.alb.WT	log2fold C.dubliniensis WT VS C.alb. WT	log2fold C.dubliniensis WT VS C.alb.deltaNRG1	function(GCDB)
orf19.999	"GCA2"	CD36_09920	1.70982	-0.14498	-1.8548	"Predicted extracellular glucoamylase, promotes biofilm matrix formation; transcript induced by ketoconazole; possibly an essential gene, disruptants not obtained by UAU1 method"
orf19.998	"orf19.998"	CD36_09910	0.559318	-2.45187	-3.01118	"Protein not essential for viability"
orf19.997	"orf19.997"	CD36_09900	0.914385	1.13974	0.225359	"Plasma membrane-associated protein of unknown function; 1 predicted transmembrane domain"
orf19.996	"orf19.996"	NA	0.770364	NA	NA	"Predicted ORF in Assemblies 19, 20 and 21; possibly an essential gene, disruptants not obtained by UAU1 method"
orf19.994	"orf19.994"	NA	0.528097	NA	NA	"Predicted ORF in Assemblies 19, 20 and 21; transcriptionally activated by Mnl1p under weak acid stress"
orf19.993	"orf19.993"	CD36_09890	0.595708	-1.44035	-2.03606	""
orf19.992	"LKH1"	CD36_09880	0.869631	-0.862839	-1.73247	"Protein repressed during the mating process; Hog1p-induced"
orf19.991	"DJP1"	CD36_09870	0.384032	0.396534	0.0125028	"Similar to bacterial DnaJ; reported to have a role in peroxisome biogenesis; transcriptionally regulated by iron; expression greater in low iron; induced upon adherence to polystyrene"
orf19.99	"HAL21"	CD36_61040	0.488269	-4.02571	-4.51398	"Putative phosphoadenosine-5'-phosphate (PAP) or 3'-phosphoadenosine 5'-phosphosulfate (PAPS) phosphatase; possible role in sulfur recycling; biofilm induced; similar to S. cerevisiae Met22p; predicted Kex2p substrate; fungal-specific"
orf19.989	"orf19.989"	CD36_09860	0.954055	-0.152642	-1.1067	"S. cerevisiae ortholog MRPS5 has structural constituent of ribosome and localizes to mitochondrial small ribosomal subunit"
orf19.988	"orf19.988"	CD36_09850	0.64111	2.52925	1.88814	"Predicted ORF in Assemblies 19, 20 and 21; fungal-specific (no human or murine homolog); transcription is upregulated in clinical isolates from HIV+ patients with oral candidiasis; possibly transcriptionally regulated upon hyphal formation"
orf19.986	"GLY1"	CD36_09840	-1.31199	0.666673	1.97866	"L-threonine aldolase; possibly tetrameric; complements the glycine auxotrophy of an S. cerevisiae shm1 null shm2 null gly1-1 triple mutant; macrophage/pseudohyphal-induced; the GLY1 locus has an RFLP and is triploid in strain SGY269"
orf19.985	"orf19.985"	CD36_09830	0.290614	-1.82366	-2.11427	""
orf19.984	"PHO8"	CD36_09820	1.14825	0.18258	-0.965669	"Protein of unknown function; transcription is positively regulated by Rim101p; regulated by Tsa1p, Tsa1Bp in minimal media at 37 deg; possibly adherence-induced"
orf19.980	"orf19.980"	CD36_50210	0.0498873	-3.31358	-3.36347	""
orf19.979	"FAS1"	CD36_50220	0.0473319	1.96469	1.91736	"Beta subunit of fatty-acid synthase; multifunctional enzyme; fluconazole-induced; amphotericin B, caspofungin repressed; macrophage/pseudohyphal-induced; fungal-specific (no human or murine homolog)"
orf19.978	"BDF1"	CD36_50230	-0.516322	-2.29407	-1.77775	"Putative transcription factor; downregulated upon adherence to polystyrene; reduced mRNA abundance detected in homozygous null mutant; macrophage/pseudohyphal-repressed; possibly an essential gene, disruptants not obtained by UAU1 method"
orf19.976	"BRE1"	CD36_50240	-0.105686	-1.48455	-1.37886	"Putative transcription factor with C3HC4 zinc finger DNA-binding motif; similar to S. cerevisiae Bre1p; transposon mutation affects filamentous growth"
orf19.974	"ROT2"	CD36_50250	0.886508	0.149033	-0.737474	"Alpha-glucosidase II, catalytic subunit, required for N-linked protein glycosylation and normal cell wall synthesis; alkaline downregulated"
orf19.972	"orf19.972"	CD36_50260	0.770548	-0.0643344	-0.834882	"S. cerevisiae ortholog SLX1 has 5'-flap endonuclease activity, has role in DNA-dependent DNA replication, response to DNA damage stimulus and localizes to Slx1-Slx4 complex"
orf19.971	"SKN7"	CD36_50270	0.536772	0.0936421	-0.44313	"Putative homolog of S. cerevisiae Skn7p, which is predicted to be a response regulator protein in a phosphorelay signal transduction pathway; required for normal hydrogen peroxide resistance"
orf19.970	"orf19.970"	CD36_50280	1.11968	-0.901708	-2.02139	"S. cerevisiae ortholog BER1 localizes to cytoplasm"
orf19.97	"CAN1"	CD36_61010	0.383508	-4.86588	-5.24939	"Amino acid permease, transports basic amino acids; complements lysine transport mutation; contains 10 predicted transmembrane regions and 3 predicted N-glycosylation sites; transcriptionally induced upon phagocytosis by macrophage"
orf19.969	"orf19.969"	CD36_50290	0.141408	-2.14045	-2.28186	"S. cerevisiae ortholog PRS1 has ribose phosphate diphosphokinase activity, has role in fungal-type cell wall organization, 5-phosphoribose 1-diphosphate biosynthetic process and localizes to cytoplasm"
orf19.968	"PGA14"	CD36_50300	0.497326	-1.03135	-1.52867	"Putative GPI-anchored protein of unknown function; induced during cell wall regeneration; regulated by Ssn6p"
orf19.967	"orf19.967"	CD36_50310	1.5183	1.41308	-0.105214	"S. cerevisiae ortholog NUC1 has endodeoxyribonuclease activity, exodeoxyribonuclease activity, ribonuclease activity and has role in apoptosis, DNA recombination, RNA catabolic process, DNA catabolic process"
orf19.966	"orf19.966"	CD36_50320	1.43219	2.04717	0.614976	"S. cerevisiae ortholog DUS4 has role in tRNA modification"
orf19.964	"SMC4"	CD36_50330	0.264375	-1.7132	-1.97758	"S. cerevisiae ortholog SMC4 has chromatin binding, has role in tRNA gene clustering, mitotic chromosome condensation and localizes to cohesin loading complex, nuclear condensin complex"
orf19.962	"orf19.962"	CD36_50340	0.163791	-2.3207	-2.48449	""
orf19.961.2	"orf19.961.2"	CD36_50350	0.687817	-2.30119	-2.98901	"Ortholog of S. cerevisiae YDR115W"
orf19.96	"TOP1"	CD36_60990	0.0571165	-2.47506	-2.53218	"DNA topoisomerase I; required for wild-type growth and for wild-type mouse virulence; sensitive to camptothecin; induced upon adherence to polystyrene"
orf19.956	"orf19.956"	CD36_50360	-0.183289	-1.59355	-1.41026	"S. cerevisiae ortholog CSF1 has role in fermentation and localizes to mitochondrion"
orf19.955	"orf19.955"	CD36_50370	0.806388	-1.16149	-1.96788	""
orf19.954	"orf19.954"	CD36_50380	0.440087	-1.75055	-2.19064	""
orf19.953.1	"COF1"	CD36_50390	0.461559	-1.27366	-1.73522	"Protein described as cofilin; macrophage-induced protein; protein detected by mass spec in exponential and stationary phase cultures"
orf19.952	"orf19.952"	CD36_50400	-0.672451	-0.991302	-0.318852	""
orf19.951	"orf19.951"	CD36_50410	-0.506168	1.34591	1.85208	"Predicted ORF in Assemblies 19, 20 and 21; transcription downregulated upon yeast-hyphal switch; fluconazole-induced"
orf19.95	"orf19.95"	CD36_60980	3.25179	-2.33645	-5.58824	"Ortholog of S. cerevisiae PRM5"
orf19.949	"orf19.949"	CD36_50420	0.505309	0.128049	-0.377259	""
orf19.948	"orf19.948"	NA	-Inf	NA	NA	""
orf19.947	"MRP17"	CD36_50430	0.815405	0.194313	-0.621092	"Predicted mitochondrial ribosomal protein"
orf19.946	"MET14"	CD36_50440	1.06537	1.11903	0.0536612	"Predicted ORF in Assemblies 19, 20 and 21; predicted role in sulfur metabolism; induced upon biofilm formation; possibly adherence-induced"
orf19.945	"VPS2"	CD36_50450	0.325608	0.322562	-0.00304694	"S. cerevisiae ortholog DID4 has role in protein retention in Golgi apparatus, late endosome to vacuole transport, intralumenal vesicle formation"
orf19.944	"IFG3"	CD36_50460	2.28757	1.41556	-0.872004	"Putative D-amino acid oxidase"
orf19.943	"FET33"	CD36_50470	0.404799	-0.0958841	-0.500683	"Putative multicopper ferro-O2-oxidoreductase; downregulated in core caspofungin response; fungal-specific (no human or murine homolog)"
orf19.942	"KRE62"	CD36_50480	-0.173679	1.11132	1.285	"Protein described as subunit of glucan synthase; macrophage-induced gene"
orf19.941	"SEC14"	CD36_50490	-0.600138	-1.61197	-1.01184	"Essential protein; functional homolog of S. cerevisiae Sec14p, which is a Golgi phosphatidylinositol/phosphatidylcholine transfer protein that regulates choline-phosphate cytidyltransferase and thereby affects secretion; biofilm-regulated"
orf19.940	"BUD2"	CD36_50500	-0.413754	0.286711	0.700465	"GTPase activating protein (GAP) for Rsr1p; negative regulator of filament branching, acts in hyphal growth guidance; required for wild-type budding pattern; expression greater in low iron; regulated by tyrosol and cell density"
orf19.94	"orf19.94"	CD36_60970	1.39541	-0.740664	-2.13608	""
orf19.939	"NAM7"	CD36_50510	0.197604	-1.31687	-1.51448	"Putative role in nonsense-mediated mRNA decay; similar to S. cerevisiae Nam7p; gene induced by ciclopirox olamine treatment"
orf19.938	"orf19.938"	CD36_50520	2.47018	4.36719	1.89701	""
orf19.937	"orf19.937"	NA	NaN	NA	NA	""
orf19.936	"orf19.936"	CD36_50530	Inf	Inf	4.61885	""
orf19.935	"AGA1"	CD36_50540	-0.408818	-8.17789	-7.76907	"Protein with some similarity to agglutinin subunit; expression is regulated upon white-opaque switching"
orf19.934	"orf19.934"	NA	-0.228909	NA	NA	"Predicted ORF from Assembly 19; removed from Assembly 20; subsequently reinstated in Assembly 21 and merged with orf19.2224, based on comparative genome analysis"
orf19.933	"orf19.933"	CD36_50560	0.538549	0.633004	0.094455	"S. cerevisiae ortholog UBC13 has ubiquitin-protein ligase activity and has role in postreplication repair, free ubiquitin chain polymerization, protein polyubiquitination"
orf19.932	"orf19.932"	CD36_50570	-0.35303	-2.16152	-1.80849	"Predicted ORF in Assemblies 19, 20 and 21; merged with orf19.2226 in Assembly 21; possibly an essential gene, disruptants not obtained by UAU1 method"
orf19.931	"orf19.931"	CD36_50580	0.512302	-5.37989	-5.89219	""
orf19.930	"PET9"	CD36_50590	0.227973	-1.81153	-2.0395	"Mitochondrial ADP/ATP carrier protein involved in ATP biosynthesis; possible lipid raft component; 3 predicted transmembrane helices; flucytosine induced; ketoconazole-induced; downregulated by Efg1p"
orf19.93	"orf19.93"	CD36_60960	1.58054	1.26185	-0.318684	"Predicted ORF in Assemblies 19, 20 and 21; shows colony morphology-related gene regulation by Ssn6p"
orf19.929	"orf19.929"	CD36_50600	-0.387804	-1.5278	-1.14	""
orf19.928	"orf19.928"	CD36_50610	0.503206	-1.92102	-2.42423	""
orf19.927	"orf19.927"	CD36_50620	0.96884	-1.29184	-2.26067	"S. cerevisiae ortholog CGI121 has role in telomere maintenance, positive regulation of transcription from RNA polymerase II promoter and localizes to EKC/KEOPS protein complex"
orf19.926	"EXO1"	CD36_50630	1.3662	-1.02503	-2.39123	"Predicted ORF in Assemblies 19, 20 and 21; cell-cycle regulated periodic mRNA expression"
orf19.925	"orf19.925"	CD36_50640	1.25013	0.664861	-0.585268	""
orf19.923	"THR1"	CD36_50650	1.07486	-2.3661	-3.44096	"Putative homoserine kinase; fungal-specific (no human or murine homolog); transcription is regulated by Tup1p; amphotericin B repressed; regulated by Gcn2p and Gcn4p"
orf19.922	"ERG11"	CD36_50660	0.339151	-0.29243	-0.63158	"Lanosterol 14-alpha-demethylase, member of cytochrome P450 family that functions in ergosterol biosynthesis; target of azole antifungals; may contribute to drug resistance; azole- or biofilm-induced; subject to hypoxic regulation"
orf19.921	"orf19.921"	CD36_50670	-0.997106	1.321	2.31811	"Protein required for normal filamentous growth"
orf19.920	"RMT2"	CD36_50680	0.0702464	-3.96755	-4.0378	"Minor protein arginine methyltransferases (PRMT) involved in methylation of arginine residues"
orf19.92	"orf19.92"	CD36_60930	0.233774	-0.0109106	-0.244685	"Predicted ORF in Assemblies 19, 20 and 21; increased expression in response to prostaglandins"
orf19.918	"CDR11"	CD36_84000	-1.14352	-0.100822	1.0427	"Putative transporter of PDR subfamily of ABC family; Gcn4p-regulated; upregulated by Rim101p at pH 8"
orf19.916	"orf19.916"	CD36_32090	0.115565	0.307605	0.19204	"S. cerevisiae ortholog YNL305C localizes to fungal-type vacuole"
orf19.915	"orf19.915"	NA	-3.47529	NA	NA	""
orf19.913.2	"orf19.913.2"	NA	0.292872	NA	NA	""
orf19.910	"orf19.910"	CD36_17960	0.531959	-1.92941	-2.46136	""
orf19.91	"orf19.91"	CD36_60920	0.437756	-4.82569	-5.26345	""
orf19.909.1	"orf19.909.1"	NA	2.16455	NA	NA	"Predicted ORF in Assembly 20 and 21; gene has intron"
orf19.909	"STP4"	CD36_17970	0.0654857	-0.366707	-0.432193	"Putative transcription factor with zinc finger DNA-binding motif; induced in core caspofungin response; shows colony morphology-related gene regulation by Ssn6p; induced by 17-beta-estradiol, ethynyl estradiol"
orf19.908	"FEN12"	CD36_17980	1.27468	1.10527	-0.169412	"Predicted ORF in Assemblies 19, 20 and 21; amphotericin B, caspofungin repressed"
orf19.906	"ROM2"	CD36_17990	0.0147253	-1.80133	-1.81606	"Predicted ORF in Assemblies 19, 20 and 21; possibly an essential gene, disruptants not obtained by UAU1 method"
orf19.905	"AVT7"	CD36_18000	1.30288	1.88221	0.579327	"Predicted ORF in Assemblies 19, 20 and 21; similar to S. cerevisiae Avt7p; downregulated upon adherence to polystyrene; constitutive expression independent of MTL or white-opaque status"
orf19.904	"orf19.904"	CD36_18010	0.912535	1.9562	1.04367	""
orf19.903	"GPM1"	CD36_18020	-0.789502	-3.83741	-3.04791	"Surface protein that binds host complement Factor H and FHL-1; phosphoglycerate mutase; antigenic in murine, human infection; biofilm-, fluconazole-, or amino acid starvation (3-aminotriazole treatment) induced, farnesol-downregulated"
orf19.900	"orf19.900"	CD36_18030	0.299828	0.702664	0.402836	"Predicted ORF in Assemblies 19, 20 and 21; protein detected by mass spec in stationary phase cultures"
orf19.90	"orf19.90"	CD36_60900	0.612331	-0.290385	-0.902716	"Ortholog of S. cerevisiae YFL042C"
orf19.9	"orf19.9"	CD36_32700	1.37652	-1.27271	-2.64923	""
orf19.899	"orf19.899"	CD36_18040	1.40315	0.308384	-1.09477	""
orf19.898	"HEM2"	CD36_18050	0.60793	0.131893	-0.476038	"Protein described as porphobilinogen synthase; transcriptionally regulated by iron; expression greater in high iron; protein level decreased in stationary phase cultures"
orf19.897	"VPS20"	CD36_18060	0.365171	-0.565913	-0.931085	"Putative ESCRT III complex protein with a role in multivesicular body (MVB) trafficking"
orf19.896	"CHK1"	CD36_18070	-0.372819	-2.52366	-2.15084	"Histidine kinase involved in two-component signaling pathway, regulates cell wall biosynthesis; disruption impairs hyphal growth, decreases virulence in mouse intravenous (but not rat vaginal) infection and increases rate of phagocytosis"
orf19.895	"HOG1"	CD36_18080	1.58207	2.42887	0.846804	"MAP kinase of osmotic-, heavy metal-, and core stress response; role in regulation of glycerol, D-arabitol in response to stress; phosphorylated in response to H2O2 (Ssk1p-dependent) or NaCl; mutant induces protective mouse immune response"
orf19.894	"orf19.894"	CD36_18090	0.249963	0.346378	0.0964146	""
orf19.893	"PGA17"	CD36_18100	0.754239	-1.48747	-2.24171	"Putative GPI-anchored protein of unknown function; exogenously expressed protein is a substrate for Kex2p processing in vitro; transcription is repressed in response to alpha pheromone in SpiderM medium; macrophage-induced gene"
orf19.891	"orf19.891"	CD36_18110	0.434455	0.20245	-0.232005	"Predicted ORF in Assemblies 19, 20 and 21; possibly an essential gene, disruptants not obtained by UAU1 method"
orf19.89	"orf19.89"	CD36_60890	-0.071148	-0.634611	-0.563463	"S. cerevisiae ortholog PEX7 has peroxisome matrix targeting signal-2 binding, has role in protein import into peroxisome matrix, docking and localizes to peroxisome, cytosol"
orf19.889	"THI20"	CD36_18120	-0.139088	-1.76845	-1.62936	"Putative phosphomethylpyrimidine kinase; also described as a putative transcription factor with TENA DNA-binding motif; fungal-specific (no human or murine homolog)"
orf19.886	"PAN1"	CD36_18130	0.165065	0.150261	-0.0148032	"Essential protein involved in endocytosis and polarized growth; similar to S. cerevisiae Pan1p, which is a part of a complex that regulates actin cytoskeleton"
orf19.882	"HSP78"	CD36_18140	-0.583719	-3.23194	-2.64822	"Putative heat-shock protein; transcriptionally regulated by macrophage response; transcription is regulated by Nrg1p, Mig1p, Gcn2p, Gcn4p, Mnl1p; heavy metal (cadmium) stress-induced"
orf19.881	"DFG16"	CD36_18150	-0.00223473	-1.22336	-1.22113	"Protein of the Rim101p pathway that regulates filamentation in response to alkaline pH; required for host tissue invasion during infection; similar to S. cerevisiae Dfg16p that acts in Rim101p processing"
orf19.880	"orf19.880"	CD36_18160	0.584798	-0.5148	-1.0996	"S. cerevisiae ortholog SFB3 has role in cargo loading into COPII-coated vesicle and localizes to COPII vesicle coat, mating projection tip"
orf19.88	"ILV5"	CD36_60880	0.639127	-0.382896	-1.02202	"Protein described as ketol-acid reductoisomerase; antigenic during human or murine infection; regulated by Gcn4p; amino acid starvation (3-aminotriazole) induced; biofilm induced; macrophage-downregulated protein; no human or murine homolog"
orf19.879	"orf19.879"	CD36_18170	0.560896	-1.11919	-1.68008	"S. cerevisiae ortholog SHE4 has myosin binding, has role in mating type switching, intracellular mRNA localization and localizes to cytoplasm"
orf19.878	"NBN1"	CD36_18180	0.0427455	-1.77439	-1.81714	"Subunit of the NuA4 histone acetyltransferase complex; Plc1p-regulated"
orf19.876	"PGA33"	CD36_18190	0.917669	-0.49927	-1.41694	"Putative GPI-anchored protein of unknown function"
orf19.875	"orf19.875"	CD36_18200	0.968925	-0.0548157	-1.02374	"Putative protein of unknown function, required for respiratory growth"
orf19.874	"orf19.874"	CD36_18210	0.796071	0.953116	0.157045	""
orf19.873.1	"COX6"	CD36_18220	0.615416	-1.5767	-2.19211	"Putative cytochrome c oxidase; flucytosine induced"
orf19.873	"orf19.873"	NA	0.93552	NA	NA	""
orf19.872	"orf19.872"	CD36_18230	0.838921	-1.32688	-2.1658	""
orf19.871	"orf19.871"	CD36_18240	-0.277224	1.02165	1.29888	"S. cerevisiae ortholog LST4 has protein transporter activity, has role in Golgi to plasma membrane transport, intracellular protein transport and localizes to vesicle coat"
orf19.87	"GPX1"	CD36_60870	3.23571	0.0613831	-3.17433	""
orf19.868	"ADAEC"	CD36_18250	0.727164	-0.337333	-1.0645	"Transcription is specific to white cell type"
orf19.867	"orf19.867"	CD36_18260	1.11135	0.362365	-0.748989	"S. cerevisiae ortholog AIM14 localizes to ribosome"
orf19.866	"RAD32"	CD36_18270	0.88427	0.952345	0.0680749	"Protein similar to S. cerevisiae protein with role in nucleotide excision repair; down-regulation associated with azole resistance"
orf19.864	"orf19.864"	CD36_18280	-0.412332	-2.13608	-1.72375	"S. cerevisiae ortholog NMD2 has role in nuclear-transcribed mRNA catabolic process, 3'-5' exonucleolytic nonsense-mediated decay and localizes to cytoplasm, polysome"
orf19.863	"orf19.863"	CD36_18290	1.18712	-0.624096	-1.81122	"S. cerevisiae ortholog MRPL35 has structural constituent of ribosome and localizes to mitochondrial large ribosomal subunit"
orf19.862	"orf19.862"	CD36_18300	-0.28829	0.196104	0.484394	""
orf19.861	"orf19.861"	CD36_18310	-0.100891	-0.133784	-0.0328926	"Predicted transcriptional regulator with bZip domain; possibly an essential gene, disruptants not obtained by UAU1 method"
orf19.860	"BMT8"	CD36_18320	0.0160685	0.869571	0.853503	"Putative beta-mannosyltransferase, member of a 9-gene family including characterized BMT genes with roles in beta-1,2-mannosylation of cell wall phosphopeptidomannan; transposon insertion in promoter region causes decreased colony wrinkling"
orf19.86	"orf19.86"	CD36_60860	0.728257	2.11183	1.38357	"Putative glutathione peroxidase; peroxide-induced; induced in response to peroxide, exposure to neutrophils and macrophage blood fractions; downregulated during infection of macrophages"
orf19.857	"FMO2"	NA	0.161424	NA	NA	"Predicted ORF in Assemblies 19, 20 and 21; expression regulated during planktonic growth"
orf19.856	"IFK2"	CD36_18330	1.22249	-0.548841	-1.77133	"Protein not essential for viability"
orf19.855	"orf19.855"	CD36_18340	0.3547	0.891531	0.536832	""
orf19.854	"UGA11"	CD36_18350	0.682739	2.78512	2.10238	"Predicted ORF in Assemblies 19, 20 and 21; macrophage-induced gene; overlaps orf19.854.1, which is a region annotated as a blocked reading frame"
orf19.853	"SAP99"	CD36_18360	-1.06856	-4.50672	-3.43816	"Putative secreted aspartyl protease; possible Kex2p substrate; transcriptionally regulated by iron; expression greater in low iron; repressed by alpha pheromone in SpiderM medium; possibly essential gene (by UAU1 method)"
orf19.852	"SAP98"	CD36_18370	-0.0487879	0.115897	0.164685	"Predicted ORF in Assemblies 19, 20 and 21; regulated by Gcn2p and Gcn4p; expressed in opaque MTLa/MTLa cells"
orf19.851	"orf19.851"	CD36_18380	0.105938	2.4948	2.38887	"Protein of unknown function; transcription is negatively regulated by Rim101p"
orf19.850	"orf19.850"	CD36_18390	1.14971	-0.346203	-1.49592	"S. cerevisiae ortholog NTA1 has protein N-terminal asparagine amidohydrolase activity, has role in protein modification process, protein catabolic process and localizes to mitochondrion"
orf19.85	"GPX2"	CD36_60850	1.34181	-4.66032	-6.00213	"Similar to glutathione peroxidase; expression greater in high iron; alkaline upregulated by Rim101p; transcriptionally induced by alpha factor or interaction with macrophage; regulated by Efg1p; caspofungin repressed"
orf19.849	"orf19.849"	CD36_18400	0.0832517	-0.485267	-0.568519	"S. cerevisiae ortholog MNN4 has role in protein N-linked glycosylation, response to stress, protein O-linked glycosylation"
orf19.848	"PGA16"	CD36_18410	0.148249	2.15786	2.00961	"Putative GPI-anchored protein of unknown function"
orf19.847	"YIM1"	CD36_18420	0.914699	0.180634	-0.734065	"Protein similar to protease of mitochondrial inner membrane; increased transcription is observed upon benomyl treatment; macrophage-downregulated gene"
orf19.846	"orf19.846"	CD36_18430	-0.837507	-1.67286	-0.835355	"Predicted ORF in Assemblies 19, 20 and 21; transcriptionally activated by Mnl1p under weak acid stress"
orf19.844	"STE11"	CD36_18440	0.0555747	-0.707995	-0.76357	"Predicted ORF in Assemblies 19, 20 and 21; similar to S. cerevisiae Ste11p; mutants are sensitive to growth on H2O2 medium"
orf19.843	"orf19.843"	CD36_18450	-0.0255443	0.456334	0.481878	"Putative DNA repair exonuclease; fungal-specific (no human or murine homolog)"
orf19.842	"ASR3"	CD36_18460	0.521923	4.79176	4.26983	"Gene regulated by cAMP and by osmotic stress; greater mRNA abundance observed in a cyr1 or ras1 homozygous null mutant than in wild type"
orf19.841	"orf19.841"	CD36_18470	0.112317	-1.77712	-1.88944	"S. cerevisiae ortholog COY1 has role in Golgi vesicle transport and localizes to Golgi membrane"
orf19.840	"RPL21A"	CD36_18480	0.230129	-1.27853	-1.50866	"Putative ribosomal protein; genes encoding cytoplasmic ribosomal subunits, translation factors, and tRNA synthetases are downregulated upon phagocytosis by murine macrophage"
orf19.84	"CAN3"	CD36_60830	0.0796094	-3.01079	-3.0904	"Predicted ORF in Assemblies 19, 20 and 21; expression is regulated upon white-opaque switching"
orf19.839	"orf19.839"	CD36_18500	0.49716	-4.06774	-4.5649	"Predicted ORF in Assemblies 19, 20 and 21; induced by nitric oxide in yhb1 mutant; mutation confers hypersensitivity to aureobasidin A"
orf19.838.1	"RPS9B"	CD36_18490	0.583469	-2.04925	-2.63272	"Predicted ribosomal protein; genes encoding cytoplasmic ribosomal subunits, translation factors, and tRNA synthetases are downregulated upon phagocytosis by murine macrophage; possibly transcriptionally regulated upon hyphal formation"
orf19.837.1	"INO4"	NA	0.393826	NA	NA	"Transcriptional activator that forms a heterodimer with Ino2p; likely regulates genes involved in phosphatidylcholine and phosphatidylinositol biosynthesis, fatty acid beta-oxidation, and peroxisome biogenesis; gene has intron"
orf19.837	"GNA1"	CD36_18510	1.34776	0.329224	-1.01853	"Glucosamine-6-phosphate acetyltransferase; enzyme of UDP-GlcNAc biosynthesis; required for viability in absence of GlcNAc supplementation; required for persistent infection and wild-type virulence in mouse systemic infection"
orf19.836.1	"orf19.836.1"	CD36_18520	0.579171	-0.868072	-1.44724	"S. cerevisiae ortholog SMX2 has role in nuclear mRNA splicing, via spliceosome and localizes to U1 snRNP, U4/U6 x U5 tri-snRNP complex, U2-type prespliceosome, U5 snRNP"
orf19.836	"orf19.836"	CD36_18530	1.51082	-2.41143	-3.92225	"Protein likely to be essential for growth, based on an insertional mutagenesis strategy"
orf19.835	"orf19.835"	CD36_18540	0.558659	-0.34228	-0.900939	""
orf19.834	"orf19.834"	CD36_18550	0.306005	-1.03627	-1.34228	"S. cerevisiae ortholog MNL1 has carbohydrate binding, mannosyl-oligosaccharide 1,2-alpha-mannosidase activity, has role in ER-associated protein catabolic process and localizes to endoplasmic reticulum lumen"
orf19.832	"GPI13"	CD36_18560	1.04133	-1.63826	-2.67959	"Protein of major facilitator superfamily; has phosphodiesterase/nucleotide pyrophosphatase domain; similar to S. cerevisiae Gpi13p, which acts in GPI anchor biosynthesis"
orf19.831	"orf19.831"	CD36_18570	-0.63405	-1.51752	-0.883472	""
orf19.829	"SCH9"	CD36_18580	0.820062	-2.11535	-2.93541	"Putative protein kinase involved in growth control; required for normal cell size, resistance to rapamycin and cations, chlamydospore formation, filamentous growth under some conditions, and virulence"
orf19.828	"orf19.828"	CD36_18600	1.62897	-0.72554	-2.35451	"Predicted ORF in Assemblies 19, 20 and 21; decreased expression in response to prostaglandins"
orf19.8278	"orf19.8278"	CD36_10700	0.476123	-2.56458	-3.0407	"Predicted ORF from original SGTC Assembly 19 annotation, removed from the reduced ORF set by the SGTC; subsequently reinstated in Assembly 21 based on comparative genome analysis"
orf19.827.1	"RPL39"	CD36_18610	0.458108	-2.75268	-3.21079	"Ribosomal protein L39; transcription is induced upon germ tube formation; shows colony morphology-related gene regulation by Ssn6p"
orf19.827	"orf19.827"	CD36_18620	0.162584	-2.54321	-2.70579	""
orf19.826	"orf19.826"	CD36_18630	0.746601	-0.706834	-1.45344	""
orf19.825	"GCD7"	CD36_18640	1.09542	-0.268336	-1.36376	"Protein described as a translation initiator; downregulated in the presence of human whole blood or polymorphonuclear (PMN) cells"
orf19.823	"orf19.823"	CD36_18650	Inf	NaN	-Inf	""
orf19.822	"orf19.822"	CD36_18660	-3.45001	-3.67871	-0.228703	"Protein detected in some, not all, biofilm extracts; fluconazole-downregulated; greater mRNA abundance observed in cyr1 or ras1 homozygous null mutant than in wild type; protein detected by mass spec in stationary phase cultures"
orf19.820	"SDS22"	CD36_18670	0.712631	0.521583	-0.191048	"Predicted ORF in Assemblies 19, 20 and 21; macrophage/pseudohyphal-repressed"
orf19.819	"orf19.819"	CD36_18680	0.104521	-2.2371	-2.34162	"S. cerevisiae ortholog ACP1 has role in lipoic acid biosynthetic process and localizes to mitochondrion"
orf19.816	"DCK2"	CD36_18690	0.598797	0.0311767	-0.56762	"Predicted ORF in Assemblies 19, 20 and 21; similar to S. cerevisiae Ylr422wp; transposon mutation affects filamentous growth; transcriptionally activated by Mnl1p under weak acid stress"
orf19.815	"DCK1"	CD36_18700	0.523273	-1.76635	-2.28962	"Putative guanine nucleotide exchange factor required for embedded filamentous growth; activates Rac1p; contains a DOCKER domain; similar to adjacent DCK2 and to S. cerevisiae Ylr422wp; regulated by Nrg1p"
orf19.814	"SSY1"	CD36_18710	-0.0759868	-1.74888	-1.67289	"Amino acid sensor, required for wild-type hyphal growth on solid serum or Lees media, but not for hyphal growth under all conditions; similar to S. cerevisiae Ssy1p aa sensor and to aa permeases; 12 predicted membrane spanning regions"
orf19.813	"orf19.813"	CD36_18720	0.0540981	-3.74425	-3.79835	"Predicted ORF in Assemblies 19, 20 and 21; not essential for viability; oxidative stress-induced via Cap1p; similar to S. cerevisiae Vhs3p, which is a putative phosphopantothenoylcysteine decarboxylase"
orf19.812	"orf19.812"	CD36_18730	1.58882	-0.245002	-1.83382	""
orf19.811	"orf19.811"	CD36_18740	0.413012	-0.018455	-0.431467	"Protein not essential for viability"
orf19.810	"orf19.810"	CD36_18750	-0.76287	2.05339	2.81626	"S. cerevisiae ortholog HFM1 has DNA helicase activity, has role in DNA unwinding involved in replication, synapsis, reciprocal meiotic recombination and localizes to nucleus"
orf19.81	"orf19.81"	CD36_20960	0.79414	-2.85435	-3.64849	"Ortholog of S. cerevisiae RRP46"
orf19.809	"orf19.809"	CD36_18760	0.608316	-0.552064	-1.16038	"S. cerevisiae ortholog NOP12 has role in maturation of LSU-rRNA from tricistronic rRNA transcript (SSU-rRNA, 5.8S rRNA, LSU-rRNA) and localizes to preribosome, nucleolus"
orf19.808	"orf19.808"	CD36_18770	-0.0693936	-2.81234	-2.74295	""
orf19.807	"CHS5"	CD36_18780	0.755646	0.730129	-0.0255163	"Putative chitin biosynthesis protein; fungal-specific (no human or murine homolog); transcription decreases upon yeast-to-hyphal switch"
orf19.806	"VMA7"	CD36_18790	2.35212	2.33596	-0.016164	"Putative subunit of the V-ATPase complex, which is involved in control of vacuolar pH; highly similar to S. cerevisiae Vma7p; interacts with phosphatidylinositol 3-kinase Vps34p"
orf19.805	"orf19.805"	CD36_18800	0.609358	-1.05173	-1.66109	"S. cerevisiae ortholog YGR021W localizes to mitochondrion"
orf19.804.1	"orf19.804.1"	NA	0.501808	NA	NA	"Ortholog of S. cerevisiae YPR010C-A"
orf19.804	"orf19.804"	CD36_18810	1.25972	0.443282	-0.816443	"S. cerevisiae ortholog YPR011C localizes to mitochondrion"
orf19.802	"UGA1"	CD36_18820	1.09521	1.41651	0.3213	"Protein described as GABA transaminase; transcription regulated by Mig1p and Tup1p; protein detected by mass spec in stationary phase cultures"
orf19.801	"TBF1"	CD36_18830	-0.192111	-2.83244	-2.64032	"Essential transcriptional activator that regulates ribosomal protein genes and the rDNA locus; acts with Cbf1p at a subset of promoters; recruits Fhl1p and Ifh1p to promoters; role is analogous to that of S. cerevisiae Rap1p"
orf19.8	"orf19.8"	CD36_32690	0.194791	-0.836486	-1.03128	""
orf19.799	"STE4"	CD36_18840	-0.142982	-0.224142	-0.0811597	"Beta subunit of heterotrimeric G protein of mating signal transduction pathway; required for mating; transcription is specific to cells homozygous at MTL and is induced by alpha pheromone; similar to S. cerevisiae Ste4p"
orf19.798	"TAF14"	CD36_18850	1.11246	0.940604	-0.171853	"Putative DNA-binding transcription factor; putative TFIIF subunit; macrophage-induced protein"
orf19.797	"BAT21"	CD36_18880	1.30793	0.801894	-0.506035	"Protein described as a branched chain amino acid aminotransferase; regulated by Gcn4p, Gcn2p; induced in response to amino acid starvation (3-aminotriazole treatment)"
orf19.796	"HYM1"	CD36_18890	1.21465	1.04704	-0.167614	"Mo25 family domain protein of RAM cell wall integrity signaling network; role in cell separation, azole sensitivity; required for hyphal growth"
orf19.795	"VPS36"	CD36_18900	-0.400107	-1.43734	-1.03723	"Protein involved in proteolytic activation of Rim101p, which regulates pH response; role in uptake of Histatin-5 into vacuole; similar to S. cerevisiae Vps36p, which is a member of the ESCRT II protein sorting complex"
orf19.794	"SSN3"	CD36_18910	0.390324	-0.141258	-0.531582	"Predicted ORF in Assemblies 19, 20 and 21; mutants are sensitive to growth on H2O2 medium"
orf19.793	"CAK1"	CD36_18920	2.6661	1.23347	-1.43263	"Monomeric CDK-activating kinase; functional homolog of S. cerevisiae Cak1p; phosphorylates cyclin-free human CDK2; lacks glycine loop motif; conserved lysine (K36) not required for activity; possibly essential gene (by UAU1 method)"
orf19.792	"orf19.792"	CD36_18930	0.334457	2.62073	2.28627	""
orf19.791	"RIM11"	CD36_18940	0.890753	3.09869	2.20794	""
orf19.789.1	"orf19.789.1"	CD36_43650	0.262685	0.291452	0.0287673	""
orf19.789	"PYC2"	CD36_43660	0.714791	0.793109	0.0783178	"Putative pyruvate carboxylase, binds to biotin cofactor; up-regulated in mutant lacking the Ssk1p response regulator protein, upon benomyl treatment, or in an azole-resistant strain overexpressing MDR1"
orf19.787.1	"orf19.787.1"	NA	0.832221	NA	NA	"ORF added to Assembly 21 based on comparative genome analysis; protein detected by mass spec in stationary phase cultures"
orf19.787	"orf19.787"	NA	0.0116597	NA	NA	""
orf19.783	"orf19.783"	CD36_04380	0.194053	-0.0459657	-0.240018	"S. cerevisiae ortholog NEO1 has role in retrograde vesicle-mediated transport, Golgi to ER, vacuole organization, endocytosis and localizes to Golgi membrane, endosome, COPI-coated vesicle"
orf19.782	"orf19.782"	CD36_04390	0.486182	-1.8017	-2.28788	""
orf19.781	"orf19.781"	CD36_04400	0.425447	-4.40539	-4.83083	"Major urea transporter; expression is induced by urea; fungal-specific (no human or murine homolog); not required for virulence in a mouse intravenous model"
orf19.780	"DUR1,2"	CD36_04410	0.0967493	-0.750341	-0.84709	"Urea amidolyase, contains urea carboxylase and allophanate hydrolase activities needed to hydrolyze urea to CO2; required for utilization of urea as nitrogen source and for hyphal switch in macrophages; transcription is regulated by Nrg1p"
orf19.779	"HAT1"	CD36_04420	0.828294	-0.530915	-1.35921	"S. cerevisiae ortholog HAT1 has histone binding, histone acetyltransferase activity, has role in histone acetylation, chromatin silencing at telomere and localizes to histone acetyltransferase complex, cytoplasm"
orf19.778	"PIL1"	CD36_04430	0.971004	0.0944694	-0.876535	"Echinocandin-binding protein; localizes to cell surface of hyphae, but not yeast-form cells; biofilm induced; fungal-specific (no human or murine homolog)"
orf19.776	"orf19.776"	CD36_04440	0.949703	0.944396	-0.00530734	"S. cerevisiae ortholog REC8 has role in synaptonemal complex assembly, meiotic sister chromatid cohesion, protein localization to chromosome, centromeric region, reciprocal meiotic recombination"
orf19.775	"orf19.775"	CD36_04450	-0.317762	-1.66602	-1.34826	""
orf19.773	"orf19.773"	CD36_04460	0.843332	-2.69398	-3.53731	"Putative ortholog of S. cerevisiae Rsa3p, which is a nucleolar protein involved in maturation of pre-60S ribosomal particles that interacts with Dbp6p"
orf19.772.1	"orf19.772.1"	NA	3.9556	NA	NA	""
orf19.772	"LYS21"	CD36_04470	0.786859	0.193506	-0.593353	"Putative homocitrate synthase of lysine biosynthesis; expression is increased in a fluconazole-resistant isolate; shows colony morphology-related gene regulation by Ssn6p; ketoconazole-repressed; regulated by Gcn2p and Gcn4p"
orf19.771	"LPG20"	NA	-0.795761	NA	NA	"Protein of aldo-keto reductase family; nonessential; similar to aryl alcohol dehydrogenases, S. cerevisiae Ypl088wp, A. tumefaciens MocA; osmotic stress-induced, correlates with overexpression of MDR1 in fluconazole-resistant isolate"
orf19.77.1	"orf19.77.1"	NA	-Inf	NA	NA	""
orf19.769	"IFE1"	CD36_04500	0.85174	0.743387	-0.108352	"S. cerevisiae ortholog BDH2 localizes to cytoplasm, nucleus"
orf19.7680	"CTA26"	CD36_72860	-0.116024	5.97976	6.09579	"Putative transcriptional activator; downregulated by Efg1p; transcription is upregulated in an RHE model of oral candidiasis; member of a family of telomere-proximal genes"
orf19.7680	"CTA26"	CD36_35580	-0.116024	-0.692985	-0.576961	"Putative transcriptional activator; downregulated by Efg1p; transcription is upregulated in an RHE model of oral candidiasis; member of a family of telomere-proximal genes"
orf19.768	"SYG1"	CD36_04510	-0.548276	-1.26426	-0.71598	"S. cerevisiae ortholog SYG1 has role in signal transduction and localizes to plasma membrane, mitochondrion"
orf19.7678	"orf19.7678"	CD36_35575	1.01679	-1.52507	-2.54186	"S. cerevisiae ortholog ATP16 has ATPase activity, hydrogen ion transporting ATP synthase activity, rotational mechanism and has role in ATP synthesis coupled proton transport"
orf19.7676	"XYL2"	CD36_35570	0.8351	2.3142	1.4791	"Protein described as similar to D-xylulose reductase; immunogenic in mouse; soluble protein in hyphae; Hog1p-induced; induced during cell wall regeneration; caspofungin or fluconazole-induced; Mnl1p-induced in weak acid stress"
orf19.7675	"orf19.7675"	CD36_35566	1.37064	1.63944	0.268797	"S. cerevisiae ortholog MRPL25 has structural constituent of ribosome and localizes to mitochondrial large ribosomal subunit"
orf19.7673	"orf19.7673"	CD36_35563	0.68647	-0.0304637	-0.716934	"S. cerevisiae ortholog SMD1 has mRNA binding, has role in nuclear mRNA splicing, via spliceosome and localizes to U1 snRNP, U4/U6 x U5 tri-snRNP complex, U2-type prespliceosome, U5 snRNP, commitment complex"
orf19.7672	"orf19.7672"	CD36_35560	0.758777	1.31871	0.559934	"S. cerevisiae ortholog DFM1 has role in endoplasmic reticulum unfolded protein response and localizes to endoplasmic reticulum"
orf19.7670	"orf19.7670"	CD36_35550	0.451053	0.159275	-0.291778	"Putative Ca2+/H+ antiporter; fungal-specific (no human or murine homolog)"
orf19.767	"ERG3"	NA	-1.06776	NA	NA	"C-5 sterol desaturase; introduces C-5(6) double bond into episterol in ergosterol biosynthesis; clinically-isolated homozygous null mutants show azole resistance, defects in hyphal growth and virulence; Efg1p-repressed; fluconazole-induced"
orf19.7668	"MAL2"	CD36_35540	0.860004	-0.404404	-1.26441	"Alpha-glucosidase that hydrolyzes sucrose; required for sucrose utilization; transcriptionally regulated by Suc1p; expression induced by maltose, repressed by glucose; transposon mutation affects filamentous growth; upregulated in RHE model"
orf19.7667	"IAH1"	CD36_35535	0.0507611	-0.779782	-0.830543	"Protein similar to S. cerevisiae Iah1p, which is involved in acetate metabolism; mutation confers hypersensitivity to tunicamycin; transposon mutation affects filamentous growth"
orf19.7666	"orf19.7666"	CD36_35530	-0.388657	0.222737	0.611395	"Predicted membrane transporter, member of the anion:cation symporter (ACS) family, major facilitator superfamily (MFS)"
orf19.7665	"orf19.7665"	CD36_35526	1.07077	-0.945524	-2.01629	"S. cerevisiae ortholog COX16 has role in mitochondrial respiratory chain complex IV assembly and localizes to mitochondrial inner membrane"
orf19.7664	"orf19.7664"	CD36_35524	1.48369	0.38052	-1.10317	""
orf19.7663	"orf19.7663"	CD36_35522	0.702865	-2.94607	-3.64893	"S. cerevisiae ortholog CSM1 has role in rDNA condensation, homologous chromosome segregation, protein localization to nucleolar rDNA repeats and localizes to monopolin complex, nucleolus, nuclear envelope"
orf19.7662	"orf19.7662"	CD36_35520	0.308762	-1.38565	-1.69441	""
orf19.7661	"HMI1"	CD36_35510	0.460611	-1.81742	-2.27803	"ATP-dependent 3' - 5' helicase involved in maintenance of mitochondrial DNA; ortholog of S. cerevisiae Hmi1p"
orf19.7660	"VPS52"	CD36_35500	1.17731	-0.979242	-2.15655	"Protein required for hyphal growth; has similarity to S. cerevisiae Vps52p"
orf19.7658	"RFC4"	CD36_35490	0.785578	0.323747	-0.46183	"Predicted ORF in Assemblies 19, 20 and 21; flucytosine induced; periodic mRNA expression, peak at cell-cycle G1/S phase"
orf19.7657	"POP3"	CD36_35485	1.29623	0.161993	-1.13424	"Predicted ORF in Assemblies 19, 20 and 21; decreased expression in response to prostaglandins"
orf19.7655	"RPO21"	CD36_35480	-0.0629471	-1.12824	-1.06529	"Protein similar to S. cerevisiae Rpo21p, RNA polymerase II; transposon mutation affects filamentous growth"
orf19.7654	"CPR6"	CD36_35470	1.63273	0.92525	-0.70748	"Putative peptidyl-prolyl cis-trans isomerase; macrophage/pseudohyphal-repressed; heavy metal (cadmium) stress-induced; heterozygous null mutant displays sensitivity to virgineone"
orf19.7652	"CKA1"	CD36_35460	1.42059	-0.554435	-1.97503	"Putative alpha subunit (catalytic subunit) of protein kinase CK2; Cka1p and Cka2p have a common target with respect to fluconazole resistance; synthetically lethal with CKA2; flucytosine induced"
orf19.7650	"LTV1"	CD36_35450	0.198593	-1.30405	-1.50265	"Predicted ORF in Assemblies 19, 20 and 21; decreased expression in response to prostaglandins"
orf19.7648	"orf19.7648"	CD36_35440	1.35211	1.45274	0.10063	""
orf19.7646	"orf19.7646"	CD36_35430	1.10694	-0.662274	-1.76922	""
orf19.7645	"orf19.7645"	CD36_35420	0.441707	0.364795	-0.076912	"Biotin protein ligase; catalyzes covalent attachment of biotin to biotin-dependent enzymes including acetyl CoA carboxylase and pyruvate carboxylase"
orf19.7644	"orf19.7644"	CD36_35415	1.07286	-0.776138	-1.849	"S. cerevisiae ortholog APC11 has ubiquitin-protein ligase activity and has role in anaphase-promoting complex-dependent proteasomal ubiquitin-dependent protein catabolic process, protein ubiquitination"
orf19.7643	"orf19.7643"	NA	0.840494	NA	NA	"S. cerevisiae ortholog COQ2 has 4-hydroxybenzoate octaprenyltransferase activity, has role in ubiquinone biosynthetic process and localizes to integral to mitochondrial membrane, microsome"
orf19.7642	"orf19.7642"	CD36_35400	0.876351	-2.29948	-3.17583	""
orf19.764	"orf19.764"	NA	0.317307	NA	NA	"S. cerevisiae ortholog SCY1 localizes to clathrin-coated vesicle"
orf19.7638	"PRO1"	CD36_35390	0.588821	-0.672526	-1.26135	"Transcription is regulated by Nrg1p; regulated by Gcn2p and Gcn4p"
orf19.7637	"YHB4"	CD36_35380	0.161881	-2.837	-2.99888	"Protein related to flavohemoglobins; not required for wild-type nitric oxide resistance; has predicted globin, FAD-binding, and NAD(P)-binding domains but lacks some conserved residues of flavohemoglobins; no mRNA detected"
orf19.7635	"DRS1"	CD36_74000	0.447632	-2.30352	-2.75116	"Predicted ORF in Assemblies 19, 20 and 21; mutation confers hypersensitivity to 5-fluorouracil (5-FU), tubercidin (7-deazaadenosine); transcription is positively regulated by Tbf1p; downregulated during core stress response"
orf19.7634	"MCD1"	CD36_35370	3.61773	1.21437	-2.40336	"Protein similar to S. cerevisiae Mcd1p; transcription is repressed in response to alpha pheromone in SpiderM medium; cell-cycle regulated periodic mRNA expression"
orf19.7632	"orf19.7632"	CD36_35360	1.64361	4.2388	2.59519	""
orf19.7631	"SLD5"	CD36_35355	0.949703	1.46269	0.512985	"Predicted ORF in Assemblies 19, 20 and 21; cell-cycle regulated periodic mRNA expression"
orf19.763	"orf19.763"	CD36_04540	0.921216	-1.83622	-2.75744	"S. cerevisiae ortholog CBC2 has RNA cap binding, has role in nuclear mRNA splicing, via spliceosome and localizes to nuclear cap binding complex, commitment complex"
orf19.7629	"orf19.7629"	CD36_35350	-0.0134096	-1.29512	-1.28171	"S. cerevisiae ortholog RTC1 localizes to ribosome, fungal-type vacuole"
orf19.7627	"orf19.7627"	CD36_35340	1.10502	0.364874	-0.740145	"S. cerevisiae ortholog YNL320W localizes to mitochondrion"
orf19.7626	"EIF4E"	CD36_35334	0.42694	-0.9693	-1.39624	"Putative translation initiation factor eIF4E; genes encoding ribosomal subunits, translation factors, and tRNA synthetases are downregulated upon phagocytosis by murine macrophage; alternatively spliced intron in 5' UTR"
orf19.7625	"PGA1"	CD36_35332	0.345655	-0.03354	-0.379195	"Putative GPI-anchored protein; induced during cell wall regeneration; required for normal adhesion to host cells and for adherence during biofilm formation"
orf19.7624	"orf19.7624"	CD36_35330	0.262385	-1.88248	-2.14486	"S. cerevisiae ortholog BFR2 has role in rRNA processing and localizes to 90S preribosome, nucleolus"
orf19.7622	"SPT3"	CD36_35320	0.732074	0.680861	-0.0512128	"Functional homolog of S. cerevisiae Spt3p; required for virulence in mouse systemic infection; homozygous null mutant is hyperfilamentous"
orf19.7621	"orf19.7621"	CD36_35310	-0.157117	-0.233108	-0.0759913	""
orf19.7620	"orf19.7620"	CD36_35305	0.794287	-0.982479	-1.77677	""
orf19.762	"orf19.762"	CD36_04550	2.14825	1.82644	-0.321812	""
orf19.7619	"orf19.7619"	CD36_35300	-0.010814	-0.406969	-0.396155	"Predicted ORF in Assemblies 19, 20 and 21; possibly an essential gene, disruptants not obtained by UAU1 method"
orf19.7618	"orf19.7618"	CD36_35296	1.11635	-0.753366	-1.86972	"Predicted ORF in Assemblies 19, 20 and 21; Plc1p-regulated"
orf19.7617	"orf19.7617"	CD36_35294	0.186102	-2.661	-2.8471	"S. cerevisiae ortholog ARD1 has peptide alpha-N-acetyltransferase activity, has role in histone acetylation, N-terminal protein amino acid acetylation and localizes to NatA complex, cytosolic ribosome"
orf19.7615	"orf19.7615"	CD36_35292	0.200372	-0.507953	-0.708324	"Protein involved in endoplasmic reticulum (ER) to Golgi vesicle-mediated transport; putative subunit of the transport protein particle (TRAPP) complex of the cis-Golgi"
orf19.7614	"orf19.7614"	CD36_35290	1.28136	0.0249942	-1.25637	"Protein not essential for viability"
orf19.7613	"HCR1"	CD36_35285	0.472393	-0.429496	-0.901889	"Putative translation initiation factor; genes encoding ribosomal subunits, translation factors, and tRNA synthetases are downregulated upon phagocytosis by murine macrophage"
orf19.7612	"CTM1"	CD36_35280	0.0325591	-2.62377	-2.65633	"Predicted ORF in Assemblies 19, 20 and 21; regulated by Gcn2p and Gcn4p; transcriptionally activated by Mnl1p under weak acid stress"
orf19.7611	"TRX1"	CD36_35275	0.656976	1.03175	0.37478	"Thioredoxin, involved in response to reactive oxygen species; biofilm, benomyl, flucytosine, peroxide induced; amphotericin B, caspofungin repressed; upregulated in the presence of human neutrophils; macrophage-downregulated gene"
orf19.7610	"PTP3"	CD36_35270	0.452191	0.219945	-0.232246	"Protein not essential for viability; similar to S. cerevisiae Ptp3p, which is a protein tyrosine phosphatase; hyphal induced; alkaline upregulated; regulated by Efg1p, Ras1p, cAMP pathways"
orf19.761	"TCO89"	CD36_04560	-0.053604	-1.05346	-0.999856	"Protein described as a homolog of S. cerevisiae Tco89p, which is a component of the TOR C1 complex that is involved in the regulation of growth and cell wall integrity; heterozygous null mutant displays sensitivity to rapamycin"
orf19.7609	"PGA11"	CD36_35266	0.59891	-Inf	-Inf	"Putative GPI-anchored protein of unknown function"
orf19.7608	"orf19.7608"	CD36_35264	0.711741	-5.97319	-6.68493	"Predicted ORF in Assemblies 19, 20 and 21; fluconazole-downregulated"
orf19.7606	"orf19.7606"	CD36_35262	-0.714247	-4.38468	-3.67043	""
orf19.7605	"PUP1"	CD36_35260	0.85058	2.05552	1.20494	"Predicted ORF in Assemblies 19, 20 and 21; macrophage/pseudohyphal-repressed"
orf19.7604	"orf19.7604"	CD36_35250	0.491244	-1.00305	-1.49429	"S. cerevisiae ortholog TRS120 has role in regulation of Rab GTPase activity, ER to Golgi vesicle-mediated transport and localizes to TRAPP complex"
orf19.7603	"orf19.7603"	CD36_35245	0.410832	-0.163129	-0.573961	"S. cerevisiae ortholog YMR244C-A localizes to cytoplasm, nucleus"
orf19.7602	"orf19.7602"	CD36_35240	1.3457	2.6261	1.28041	"Predicted ORF in Assemblies 19, 20 and 21; heavy metal (cadmium) stress-induced; oxidative stress-induced via Cap1p"
orf19.7601	"orf19.7601"	CD36_35230	1.18285	-3.2735	-4.45635	"S. cerevisiae ortholog MRM2 has rRNA (uridine-2'-O-)-methyltransferase activity, has role in rRNA methylation and localizes to mitochondrion"
orf19.7600	"FDH3"	CD36_35225	1.28015	-0.483971	-1.76412	"Putative protein of glycine catabolism; downregulated by Efg1p under yeast-form but not hyphal growth conditions; transcriptionally activated by Mnl1p under weak acid stress"
orf19.760	"orf19.760"	CD36_04570	1.12729	-0.477548	-1.60484	""
orf19.76	"SPB1"	CD36_64970	-0.236841	-3.72795	-3.49111	"Predicted ORF in Assemblies 19, 20 and 21; decreased expression in response to prostaglandins; possibly an essential gene, disruptants not obtained by UAU1 method"
orf19.7599	"UTP5"	CD36_35220	0.0937799	-2.87928	-2.97306	"Predicted ORF in Assemblies 19, 20 and 21; mutation confers resistance to 5-fluorocytosine (5-FC), 5-fluorouracil (5-FU), and tubercidin (7-deazaadenosine); physically interacts with TAP-tagged Nop1p"
orf19.7598	"orf19.7598"	CD36_35210	0.233884	0.255206	0.0213222	""
orf19.7597	"PGA12"	CD36_35200	4.73321	0.504508	-4.2287	"Putative GPI-anchored protein of unknown function"
orf19.7596	"orf19.7596"	CD36_35190	-0.607826	-0.351102	0.256724	""
orf19.7595	"orf19.7595"	CD36_35180	0.224975	-2.23805	-2.46302	""
orf19.7594	"orf19.7594"	CD36_35175	0.362374	-3.6267	-3.98907	""
orf19.7593	"orf19.7593"	CD36_35170	0.599628	-3.96095	-4.56058	"S. cerevisiae ortholog ASP1 has role in asparagine catabolic process and localizes to intracellular"
orf19.7592	"FAA4"	CD36_35160	0.874609	-0.141941	-1.01655	"Predicted acyl CoA synthase"
orf19.7590	"orf19.7590"	CD36_35150	0.905183	0.0205965	-0.884586	"Protein described as NADH-ubiquinone oxidoreductase; identified in detergent-resistant membrane fraction (possible lipid raft component); predicted N-terminal acetylation; repressed by nitric oxide"
orf19.759	"orf19.759"	CD36_04580	1.2315	0.0660546	-1.16544	"S. cerevisiae ortholog SEC21 has role in retrograde vesicle-mediated transport, Golgi to ER, ER to Golgi vesicle-mediated transport and localizes to COPI vesicle coat, endosome"
orf19.7589	"orf19.7589"	CD36_35145	0.636952	1.96859	1.33164	"Predicted ORF in Assemblies 19, 20 and 21; transcription is activated in the presence of elevated CO2"
orf19.7588	"orf19.7588"	CD36_35140	1.60197	-0.827912	-2.42988	"S. cerevisiae ortholog RRG7 localizes to mitochondrion"
orf19.7586	"CHT3"	CD36_35130	0.544178	4.03602	3.49185	"Chitinase, major; functional homolog of S. cerevisiae Cts1p; 4 N-glycosylation motifs; possible O-mannosylated region; putative signal peptide; hyphal-repressed; farnesol upregulated in biofilm; regulated by Efg1p, Cyr1p, Ras1p"
orf19.7585	"INO1"	CD36_35120	-0.755536	1.36077	2.11631	"Inositol-1-phosphate synthase; enzyme of inositol biosynthesis; antigenic in human; repressed by farnesol (in biofilm) or caspofungin; regulated during planktonic growth; upstream inositol/choline regulatory element; glycosylation predicted"
orf19.7583	"ZCF39"	CD36_35110	0.972718	-1.45528	-2.428	"Putative transcription factor with zinc cluster DNA-binding motif; not essential for viability; filament induced"
orf19.7581	"orf19.7581"	CD36_35100	-0.113754	-3.12633	-3.01258	""
orf19.7580	"orf19.7580"	CD36_35095	0.7889	-1.53502	-2.32392	""
orf19.758	"orf19.758"	CD36_04590	0.401088	0.74822	0.347132	""
orf19.7579	"FGR34"	CD36_35090	0.627434	0.611061	-0.0163728	"Protein lacking an ortholog in S. cerevisiae; transposon mutation affects filamentous growth"
orf19.7578	"orf19.7578"	CD36_35085	2.1212	3.69715	1.57595	""
orf19.7577	"MSS51"	CD36_35080	1.02654	-1.41051	-2.43705	"Putative mRNA maturation factor; fungal-specific (no human or murine homolog)"
orf19.7576	"orf19.7576"	CD36_35075	1.05239	1.85904	0.806652	"Protein not essential for viability"
orf19.7574	"orf19.7574"	CD36_35070	0.0389015	-0.501157	-0.540059	""
orf19.7572	"SPT7"	CD36_35060	-0.551702	-1.62806	-1.07636	"Predicted ORF in Assemblies 19, 20 and 21; mutation confers hypersensitivity to toxic ergosterol analog, and to amphotericin B"
orf19.7571	"UBC4"	CD36_35055	2.32488	3.08622	0.761343	"S. cerevisiae ortholog UBC4 has role in protein monoubiquitination, response to stress, protein polyubiquitination, ubiquitin-dependent protein catabolic process via the multivesicular body sorting pathway"
orf19.7570	"UGA3"	CD36_35050	-0.207454	-1.92856	-1.72111	"Putative transcription factor with zinc cluster DNA-binding motif, required for utilization of gamma-aminobutyrate (GABA) as a nitrogen source"
orf19.757.1	"orf19.757.1"	NA	1.6843	NA	NA	""
orf19.757	"orf19.757"	CD36_04600	0.238572	-0.766944	-1.00552	"Ortholog of S. cerevisiae YPR089W"
orf19.7569	"SIK1"	CD36_35040	-0.568723	-2.76332	-2.1946	"Predicted ORF in Assemblies 19, 20 and 21; physically interacts with TAP-tagged Nop1p"
orf19.7568	"orf19.7568"	CD36_35035	0.678764	0.288268	-0.390495	"Ortholog of S. cerevisiae SPS4"
orf19.7567	"orf19.7567"	CD36_35030	0.232103	-1.78795	-2.02006	"Predicted ORF in Assemblies 19, 20 and 21; transcription is induced in response to alpha pheromone in SpiderM medium"
orf19.7566	"orf19.7566"	CD36_35020	-0.346643	-0.957845	-0.611202	"Putative protein of unknown function, transcription is upregulated in clinical isolates from HIV+ patients with oral candidiasis; alkaline upregulated by Rim101p; fungal-specific (no human or murine homolog)"
orf19.7565	"GNP3"	CD36_35010	-0.699959	-3.14727	-2.44731	"Putative high-affinity glutamine permease; fungal-specific (no human or murine homolog)"
orf19.7564	"DPB2"	CD36_35000	2.81704	1.41097	-1.40608	"Probable subunit of DNA polymerase II (DNA polymerase epsilon), similar to S. cerevisiae Dpb2p; essential for viability"
orf19.7563	"BET2"	CD36_34990	1.46518	-0.514917	-1.9801	"Transcription is regulated by Mig1p"
orf19.7561	"DEF1"	CD36_34980	1.13743	-8.75488	-9.89231	"Protein required for filamentous growth and for escape from epithelial cells and dissemination in an RHE model; transcription induced in oral candidiasis clinical isolates; induced by fluconazole, high cell density; hyphally regulated"
orf19.756	"SAP7"	CD36_04610	-0.173679	0.908118	1.0818	"Member of the secreted aspartyl proteinase family; expression detected during human oral infection; regulated by Ssn6p; role in murine intravenous infection; induced during, but not required for, murine vaginal infection"
orf19.7558	"YTA6"	CD36_34970	-0.191941	-1.34501	-1.15307	"Protein similar to S. cerevisiae Yta6p ATPase; transposon mutation affects filamentous growth; transcriptionally activated by Mnl1p under weak acid stress"
orf19.7557	"FGR46"	NA	-0.588717	NA	NA	"Protein lacking an ortholog in S. cerevisiae; transposon mutation affects filamentous growth"
orf19.7556	"orf19.7556"	CD36_34965	0.948831	0.239107	-0.709724	""
orf19.7555	"orf19.7555"	NA	-1.43671	NA	NA	""
orf19.7554	"orf19.7554"	CD36_34960	-3.20545	-5.30571	-2.10026	"Putative transporter; slightly similar to the Sit1p siderophore transporter; induced by nitric oxide in yhb1 mutant"
orf19.7553	"orf19.7553"	CD36_34955	0.418595	-0.860615	-1.27921	""
orf19.7552	"orf19.7552"	CD36_34950	-0.169109	-1.53356	-1.36445	"Predicted ORF in Assemblies 19, 20 and 21; downregulated during core stress response"
orf19.7551	"ALO1"	CD36_34940	-0.062435	-4.09026	-4.02783	"D-Arabinono-1,4-lactone oxidase involved in biosynthesis of dehydro-D-arabinono-1,4-lactone, which has a protective role against oxidative damage; plasma membrane-localized;required for full virulence in a mouse model of systemic infection"
orf19.7550	"IFA14"	CD36_34930	-0.661234	-5.79352	-5.13228	"Predicted ORF in Assemblies 19, 20 and 21; Plc1p-regulated; transcription is induced in response to alpha pheromone in SpiderM medium"
orf19.755	"MRPL37"	CD36_04620	1.19517	0.0291704	-1.166	"Predicted ORF in Assemblies 19, 20 and 21; shows colony morphology-related gene regulation by Ssn6p"
orf19.7549	"PMT5"	CD36_34920	0.674132	-2.34349	-3.01762	"Protein mannosyltransferase (PMT), expressed at extremely low levels; not required for wild-type hyphal growth, drug resistance, or virulence in mouse systemic infection; one of five PMT family members"
orf19.7548	"orf19.7548"	CD36_34915	0.601108	-1.27589	-1.877	"S. cerevisiae ortholog SRB7 has RNA polymerase II transcription mediator activity, has role in transcription from RNA polymerase II promoter and localizes to mediator complex"
orf19.7547	"orf19.7547"	CD36_34910	-0.7601	-1.11686	-0.356764	"S. cerevisiae ortholog PIB1 has ubiquitin-protein ligase activity, phosphatidylinositol-3-phosphate binding, has role in protein ubiquitination and localizes to fungal-type vacuole membrane, late endosome"
orf19.7546	"orf19.7546"	CD36_34900	0.623209	-2.24788	-2.87108	"S. cerevisiae ortholog RRP3 has RNA-dependent ATPase activity and has role in maturation of SSU-rRNA from tricistronic rRNA transcript (SSU-rRNA, 5.8S rRNA, LSU-rRNA)"
orf19.7545	"orf19.7545"	NA	-1.25451	NA	NA	"Predicted ORF in Assemblies 19, 20 and 21; similarity to mutator-like element (MULE) transposase"
orf19.7544	"TLO1"	NA	1.2704	NA	NA	"Member of a family of telomere-proximal genes of unknown function; hyphal-induced expression"
orf19.754	"YBN5"	CD36_04630	0.46372	-0.0340447	-0.497764	"S. cerevisiae ortholog OLA1 has ATPase activity and localizes to cytoplasm"
orf19.7539.1	"orf19.7539.1"	NA	0.807398	NA	NA	"Predicted ORF in Assemblies 19, 20 and 21; transcription detected in high-resolution tiling array experiments"
orf19.7539	"INO2"	CD36_25070	0.527384	2.46625	1.93886	"Transcriptional activator that forms a heterodimer with Ino4p; likely regulates genes involved in phosphatidylcholine and phosphatidylinositol biosynthesis, fatty acid beta-oxidation, and peroxisome biogenesis"
orf19.7538	"orf19.7538"	CD36_25080	0.430784	0.236649	-0.194134	""
orf19.7537	"BNR1"	CD36_25090	0.462541	0.471569	0.00902801	"Formin; probable role in hyphal cytoskeletal polarity; synthetic lethality if Bnr1p and Bni1p are absent"
orf19.7534	"MIS12"	CD36_25100	0.445151	-2.25976	-2.70491	""
orf19.7531	"orf19.7531"	CD36_25110	1.24514	2.06459	0.819447	"Protein detected by mass spec in stationary phase cultures; transcription is induced upon yeast-hyphal transition; benomyl or caspofungin induced"
orf19.753	"orf19.753"	CD36_04640	0.863143	-3.54779	-4.41094	"S. cerevisiae ortholog MNT4 has alpha-1,3-mannosyltransferase activity and has role in protein O-linked glycosylation"
orf19.7529	"EPL1"	CD36_25120	-0.118546	-3.09613	-2.97758	"Subunit of the NuA4 histone acetyltransferase complex"
orf19.7527	"orf19.7527"	CD36_25130	0.328546	-2.14916	-2.47771	""
orf19.7523	"MKC1"	CD36_25140	0.371058	-3.82425	-4.19531	"MAP kinase; role in biofilm formation, contact-induced invasive filamentation, systemic virulence in mouse, cell wall structure/maintenance, caspofungin response; phosphorylated on surface contact, membrane perturbation, or cell wall stress"
orf19.7522	"orf19.7522"	CD36_25150	0.904066	0.740786	-0.16328	"Predicted ORF in Assemblies 19, 20 and 21; mutation confers hypersensitivity to amphotericin B"
orf19.7521	"REP1"	CD36_25160	0.0422766	0.433437	0.391161	"Protein involved in negative regulation of MDR1 transcription; mutants show increased resistance to azole drugs"
orf19.7520	"POT1"	CD36_25170	1.14978	1.39585	0.246062	"Putative peroxisomal 3-oxoacyl CoA thiolase; transcription is regulated by Nrg1p and Mig1p; farnesol regulated"
orf19.752	"orf19.752"	CD36_04650	1.27617	1.26497	-0.0111938	""
orf19.7519	"orf19.7519"	CD36_25180	0.176472	-1.37949	-1.55597	""
orf19.7518	"ZCF38"	CD36_25190	-0.189605	-0.0512488	0.138356	"Putative transcription factor with zinc cluster DNA-binding motif"
orf19.7517	"CHT1"	CD36_25200	0.228004	-1.8627	-2.0907	"Chitinase; putative N-terminal catalytic domain; has secretory signal sequence; lacks S/T region and N-glycosylation motifs of Chs2p and Chs3p; alkaline downregulated; expression not detected in yeast-form or hyphal cells"
orf19.7516	"orf19.7516"	CD36_25210	-0.291893	-1.59086	-1.29897	""
orf19.7514	"PCK1"	CD36_25230	0.0720734	1.26127	1.1892	"Phosphoenolpyruvate carboxykinase; role in gluconeogenesis; regulated by hyphal switch, carbon source; repressed on glucose; induced by fluconazole, phagocytosis, H2O2; predicted ATP-dependent, dimeric; predicted PKC phosphorylation sites"
orf19.7513	"ALK2"	CD36_25250	-0.254811	0.928971	1.18378	""
orf19.7512	"orf19.7512"	CD36_25260	0.508651	3.4984	2.98975	""
orf19.7511	"orf19.7511"	CD36_25270	0.154577	-1.86157	-2.01614	"S. cerevisiae ortholog NUP192 has structural constituent of nuclear pore and has role in nuclear pore organization"
orf19.7510	"KIN2"	CD36_25300	-0.0396805	-1.82773	-1.78805	"Putative protein with similarity to S. cerevisiae Kin2p, transcription is positively regulated by Tbf1"
orf19.751	"orf19.751"	CD36_04660	1.5516	1.50921	-0.0423911	""
orf19.7509.2	"LSM6"	CD36_25280	0.34315	-0.35263	-0.695781	"ORF Predicted by Annotation Working Group; flucytosine induced"
orf19.7509.1	"ATP17"	CD36_25290	1.21732	0.272883	-0.94444	"Mitochondrial ATPase complex subunit; downregulated by Efg1p; flucytosine induced; caspofungin repressed"
orf19.7507	"orf19.7507"	CD36_25310	1.43065	0.830435	-0.600213	""
orf19.7506	"orf19.7506"	CD36_25320	0.100244	-2.809	-2.90924	""
orf19.7504	"orf19.7504"	CD36_25330	0.0207814	-1.83887	-1.85965	"Predicted ORF in Assemblies 19, 20 and 21; Plc1p-regulated; induced in core caspofungin response"
orf19.7503	"CDA2"	CD36_25340	-3.68546	-2.20627	1.47918	"Putative protein of unknown function, transcription is positively regulated by Tbf1p"
orf19.7502	"orf19.7502"	CD36_25350	0.448749	-1.40062	-1.84937	"Predicted ORF in Assemblies 19, 20 and 21; greater mRNA abundance observed in a cyr1 homozygous null mutant than in wild type"
orf19.7501	"orf19.7501"	CD36_25370	-0.279804	-0.69282	-0.413016	"Predicted ORF in Assemblies 19, 20 and 21; protein detected by mass spec in exponential and stationary phase cultures"
orf19.7500	"PXA1"	CD36_25450	0.494265	-1.32776	-1.82202	"Putative peroxisomal, half-size adrenoleukodystrophy protein (ALD or ALDp) subfamily ABC family transporter"
orf19.750	"orf19.750"	CD36_04670	-0.522183	-5.55067	-5.02849	"Predicted ORF in Assemblies 19, 20 and 21; exogenously expressed protein is a substrate for Kex2p processing in vitro"
orf19.7499.1	"orf19.7499.1"	NA	-0.274694	NA	NA	""
orf19.7499	"orf19.7499"	CD36_25480	-0.158538	-0.761016	-0.602478	"Putative nicotinic acid mononucleotide adenylyltransferase, involved in NAD salvage pathway"
orf19.7498	"LEU1"	CD36_25490	-0.319859	-2.3229	-2.00304	"Protein described as 3-isopropylmalate dehydratase; antigenic in human; decreased expression in hyphae compared to yeast-form cells; alkaline downregulated; upregulated in the presence of human whole blood or polymorphonuclear (PMN) cells"
orf19.7497	"orf19.7497"	CD36_25510	0.00425527	-1.27967	-1.28393	""
orf19.7495	"orf19.7495"	CD36_25520	1.10114	-0.797282	-1.89842	"Predicted ORF in Assemblies 19, 20 and 21; induced by nitric oxide"
orf19.7494	"orf19.7494"	CD36_25530	-0.0687096	-2.33673	-2.26802	"Predicted ORF in Assemblies 19, 20 and 21; cell-cycle regulated periodic mRNA expression"
orf19.7492	"SWC4"	CD36_25540	0.23786	-1.38512	-1.62298	"Subunit of the NuA4 histone acetyltransferase complex"
orf19.7491	"RTT109"	CD36_25550	1.02604	1.28437	0.258325	"Histone acetyltransferase, mutants are sensitive to DNA damage, show decreased virulence in mice and increased susceptibility to killing by macrophages"
orf19.7490	"orf19.7490"	CD36_25560	0.895151	1.89638	1.00123	"Predicted membrane transporter, member of the fucose:proton symporter (FHS) family, major facilitator superfamily (MFS)"
orf19.7489.3	"orf19.7489.3"	CD36_25570	-0.0839245	-0.950057	-0.866133	"S. cerevisiae ortholog FRA2 has role in negative regulation of transcription from RNA polymerase II promoter in response to iron and localizes to nucleus, cytosol"
orf19.7489	"orf19.7489"	CD36_25580	0.261202	-0.529042	-0.790244	"S. cerevisiae ortholog LRG1 has Rho GTPase activator activity, has role in small GTPase mediated signal transduction, fungal-type cell wall biogenesis and localizes to cellular bud neck, mitochondrion"
orf19.7488	"orf19.7488"	CD36_25590	0.151928	-1.28879	-1.44072	"S. cerevisiae ortholog IMP3 has snoRNA binding and localizes to small-subunit processome, Mpp10 complex"
orf19.7487	"orf19.7487"	NA	0.917342	NA	NA	""
orf19.7486	"MRPL6"	CD36_25600	0.90847	-2.48311	-3.39158	"Putative mitochondrial ribosomal protein"
orf19.7485	"orf19.7485"	CD36_25610	1.72824	-0.737852	-2.4661	"S. cerevisiae ortholog MRPL9 localizes to mitochondrion"
orf19.7484	"ADE1"	CD36_25620	0.994757	-0.482164	-1.47692	"Phosphoribosylaminoimadazole succinocarboxamide synthetase, enzyme of adenine biosynthesis; not induced during GCN response, in contrast to the S. cerevisiae ortholog; fungal-specific (no human or murine homolog)"
orf19.7483	"CRM1"	CD36_25630	0.255877	-1.31386	-1.56974	"Functional homolog of S. cerevisiae Crm1p, which acts in protein nuclear export; predicted to be resistant to antifungal drug leptomycin B; partially suppresses signal transduction defects of S. cerevisiae ste20 mutant"
orf19.7482	"orf19.7482"	CD36_25640	-1.43671	1.57394	3.01065	""
orf19.7481	"MDH1"	CD36_25650	1.41553	1.06588	-0.349642	"Protein described as malate dehydrogenase, mitochondrial; transcription regulated by Mig1p and Tup1p, white-opaque switching; induced in high iron, biofilm; regulated upon phagocytosis; antigenic during murine or human infection"
orf19.7480	"orf19.7480"	NA	Inf	NA	NA	"Putative protein of unknown function, transcription is upregulated in clinical isolates from HIV+ patients with oral candidiasis"
orf19.748	"orf19.748"	CD36_44840	0.307964	-0.931785	-1.23975	"S. cerevisiae ortholog NUP145 has RNA binding and has role in mRNA export from nucleus, nuclear pore organization, protein import into nucleus, tRNA splicing, via endonucleolytic cleavage and ligation, chromosome localization"
orf19.7479	"NTH1"	CD36_25660	0.302483	1.45929	1.1568	"Neutral trehalase; hyphal induction in homozygous null mutant is delayed but not reduced overall; not required for virulence in mouse systemic infection; homodimeric enzyme; possible regulatory cAMP-dependent phosphorylation at S10 and S213"
orf19.7478	"orf19.7478"	CD36_25670	1.49914	-0.262757	-1.76189	"S. cerevisiae ortholog COQ1 has trans-hexaprenyltranstransferase activity, has role in ubiquinone biosynthetic process and localizes to mitochondrion"
orf19.7477	"YRB1"	CD36_25680	0.885374	1.94363	1.05825	"Functional homolog of S. cerevisiae Yrb1p, which regulates Gsp1p GTPase activity and thereby affects nucleocytoplasmic transport and cytoskeletal dynamics; transcription is not regulated by white-opaque switching or by dimorphic transition"
orf19.7475	"PHO81"	CD36_25690	-0.259255	0.130252	0.389507	"Protein involved in regulation of hyphal development; required for response to farnesoic acid; possibly adherence-induced"
orf19.7473	"orf19.7473"	CD36_25700	-0.0361756	2.72947	2.76564	""
orf19.7472	"IFF4"	CD36_25710	0.608978	-3.06305	-3.67203	"Putative GPI-anchored protein; homozygous null mutant germ tubes show decreased adhesion to plastic substrate; not essential for viability"
orf19.747	"NBP35"	CD36_44830	0.229742	0.118621	-0.111121	"Similar to nucleotide-binding proteins; increased transcription is observed upon benomyl treatment; transcription is induced upon filamentous growth"
orf19.7469	"ARG1"	CD36_25720	0.827076	-0.969322	-1.7964	"Similar to argininosuccinate synthase; enzyme of arginine biosynthesis; increased transcription is observed upon benomyl treatment; regulated by Gcn4p, Rim101p; induced in response to amino acid starvation (3-aminotriazole treatment)"
orf19.7468	"orf19.7468"	CD36_25730	0.832493	0.0989679	-0.733525	"Predicted ORF in Assemblies 19, 20 and 21; expression upregulated during growth in the mouse cecum"
orf19.7466	"ACC1"	CD36_25740	-0.129758	-0.26273	-0.132972	"Protein with similarity to acetyl-coenzyme-A carboxylases; regulated by Efg1p; amphotericin B repressed; caspofungin repressed; intron in 5'-UTR"
orf19.7464	"orf19.7464"	CD36_25760	-0.266789	6.26016	6.52694	"Predicted ORF in Assemblies 19, 20 and 21; mutation confers hypersensitivity to toxic ergosterol analog"
orf19.7464	"orf19.7464"	CD36_25750	-0.266789	-1.57309	-1.30631	"Predicted ORF in Assemblies 19, 20 and 21; mutation confers hypersensitivity to toxic ergosterol analog"
orf19.7463	"orf19.7463"	NA	-0.285847	NA	NA	"S. cerevisiae ortholog RRT12 has role in ascospore wall assembly and localizes to ascospore wall, nuclear envelope"
orf19.7460	"orf19.7460"	CD36_25770	0.439529	-3.2746	-3.71413	"Putative protein of unknown function, transcription is activated in the presence of elevated CO2"
orf19.746	"orf19.746"	NA	-0.10344	NA	NA	"Ortholog of S. cerevisiae YJL049W"
orf19.7459	"orf19.7459"	CD36_86670	-0.60669	-0.338245	0.268445	"Predicted ORF in Assemblies 19, 20 and 21; fluconazole-induced; ketoconazole-repressed"
orf19.7458	"orf19.7458"	CD36_86660	1.13419	0.727567	-0.406626	""
orf19.7457	"orf19.7457"	CD36_86650	0.220332	-2.42124	-2.64157	"Protein with Mob2p-dependent hyphal regulation"
orf19.7456	"orf19.7456"	CD36_86640	2.63064	1.42929	-1.20135	""
orf19.7455	"orf19.7455"	CD36_86630	6.27753	5.17693	-1.1006	""
orf19.7454	"TAF60"	CD36_86620	0.59611	-1.45384	-2.04995	"Predicted ORF in Assemblies 19, 20 and 21; mutation confers hypersensitivity to amphotericin B"
orf19.7453	"orf19.7453"	CD36_86610	0.262205	-2.42284	-2.68504	""
orf19.7452	"orf19.7452"	CD36_86610	1.16761	-1.01498	-2.18259	""
orf19.7451	"FUN31"	CD36_86600	0.0874679	-1.8891	-1.97657	"Putative PAS kinase involved in cell wall damage response; similar to S. cerevisiae Psk1p, which is a putative serine/threonine protein kinase; transcriptionally activated by Mnl1p under weak acid stress"
orf19.7450	"orf19.7450"	CD36_86590	0.455475	-1.61725	-2.07272	""
orf19.745	"VAC8"	CD36_44810	0.178214	0.308934	0.130719	"Protein involved in vacuolar inheritance; required for hyphal growth; contains armadillo repeats"
orf19.7449	"orf19.7449"	CD36_86580	0.782018	-1.35971	-2.14173	"S. cerevisiae ortholog DML1 has role in plasmid maintenance, mitochondrial genome maintenance and localizes to mitochondrion"
orf19.7448	"LYS9"	CD36_86570	0.971727	0.724391	-0.247336	"Putative enzyme of lysine biosynthesis; soluble protein in hyphae; amphotericin B repressed; Gcn4p-regulated; shows colony morphology-related gene regulation by Ssn6p"
orf19.7447	"JEN1"	CD36_86560	3.48652	3.5147	0.0281783	"Lactate transporter; transcriptionally induced by lactic acid, activated by Cat8p; alkaline downregulated by Rim101p; localizes to plasma membrane; similar to S. cerevisiae Jen1p"
orf19.7446	"OPI3"	CD36_86550	1.03807	0.532523	-0.505543	"Putative phosphatidylethanolamine N-methyltransferase of phosphatidylcholine biosynthesis; downregulation correlates with clinical development of fluconazole resistance; amphotericin B repressed; caspofungin repressed"
orf19.7445	"orf19.7445"	CD36_86540	-0.310488	-2.14033	-1.82984	"Ortholog of S. cerevisiae VID24"
orf19.7444	"orf19.7444"	CD36_86520	0.288521	-0.641014	-0.929535	"S. cerevisiae ortholog YOR352W localizes to cytoplasm, nucleus"
orf19.7443	"orf19.7443"	CD36_86510	1.0024	-0.238576	-1.24097	""
orf19.7442	"orf19.7442"	CD36_86500	0.654633	-1.8117	-2.46633	""
orf19.7441	"orf19.7441"	CD36_86490	0.439628	-1.15759	-1.59721	"S. cerevisiae ortholog BRR6 has role in mRNA export from nucleus, protein export from nucleus, nuclear envelope organization, cellular lipid metabolic process and localizes to nuclear envelope"
orf19.7440	"HST6"	CD36_86480	0.148249	0.0646972	-0.0835517	"ABC transporter related to mammalian P-glycoproteins; functional homolog of S. cerevisiae Ste6p (a-pheromone transporter); required for mating of MTLa cells; a-type specific, not regulated during white-opaque or yeast-hyphal switching"
orf19.744	"GDB1"	CD36_44790	0.358889	-0.782797	-1.14169	"Putative glycogen debranching enzyme; expression is regulated upon white-opaque switching; regulated by Nrg1p, Tup1p"
orf19.7438	"UBA1"	CD36_86470	0.519765	-0.740812	-1.26058	"Protein similar to S. cerevisiae Uba1p, which is a ubiquitin-activating enzyme that is essential for growth; protein level decreased in stationary phase cultures"
orf19.7437	"orf19.7437"	CD36_86460	1.24944	2.54667	1.29724	"Ortholog of S. cerevisiae YJL218W"
orf19.7436.1	"ECM15"	CD36_86440	0.0417099	-0.14394	-0.18565	"ORF Predicted by Annotation Working Group; caspofungin repressed"
orf19.7436	"AAF1"	CD36_86430	-0.270865	0.687602	0.958468	"Possible regulatory protein; Glu-rich domain; production in S. cerevisiae increases endothelial cell adherence and flocculence; expressed under diverse conditions, detected in yeast-form and hyphal cells; alkaline or caspofungin upregulated"
orf19.7434	"GLG2"	CD36_86420	1.62195	1.52609	-0.0958582	"Protein described as self-glucosylating initiator of glycogen synthesis; expression is regulated upon white-opaque switching; hyphal-induced"
orf19.7433	"orf19.7433"	CD36_86410	0.231737	-1.54335	-1.77508	"S. cerevisiae ortholog NUP116 has role in mRNA export from nucleus, tRNA export from nucleus, protein import into nucleus, tRNA splicing, via endonucleolytic cleavage and ligation and localizes to Nup82 complex"
orf19.7428	"APN1"	CD36_86400	0.241836	-0.724845	-0.966681	"Ortholog of S. cerevisiae Apn1p, which is an AP endonuclease; transcriptionally induced by interaction with macrophage; fungal-specific (no human or murine homolog)"
orf19.7427	"orf19.7427"	CD36_86390	1.1571	-1.13885	-2.29596	"S. cerevisiae ortholog YML018C localizes to fungal-type vacuole membrane"
orf19.7426	"orf19.7426"	CD36_86380	2.02272	1.24147	-0.781244	"S. cerevisiae ortholog OST6 has dolichyl-diphosphooligosaccharide-protein glycotransferase activity and has role in protein N-linked glycosylation via asparagine, protein complex assembly"
orf19.7425	"orf19.7425"	CD36_86370	1.19147	-2.96129	-4.15276	"S. cerevisiae ortholog UNG1 has uracil DNA N-glycosylase activity, has role in DNA repair and localizes to nucleus, mitochondrion"
orf19.7424	"NSA2"	CD36_86360	NaN	NaN	NaN	"Predicted ORF in Assemblies 19, 20 and 21; decreased expression in response to prostaglandins"
orf19.7422	"orf19.7422"	CD36_86100	0.261331	-7.41852	-7.67985	"S. cerevisiae ortholog LCP5 has RNA binding"
orf19.7422	"orf19.7422"	CD36_86350	0.261331	-10.0455	-10.3068	"S. cerevisiae ortholog LCP5 has RNA binding"
orf19.7421	"CYP5"	CD36_86110	1.66781	-Inf	-Inf	"Protein described as a peptidyl-prolyl cis-trans isomerase; macrophage-downregulated protein level; protein level decreased in stationary phase cultures; predicted endoplasmic reticulum (ER) localization"
orf19.7421	"CYP5"	CD36_86340	1.66781	-2.02549	-3.6933	"Protein described as a peptidyl-prolyl cis-trans isomerase; macrophage-downregulated protein level; protein level decreased in stationary phase cultures; predicted endoplasmic reticulum (ER) localization"
orf19.7420	"orf19.7420"	CD36_86120	0.0982082	-Inf	-Inf	"S. cerevisiae ortholog MED6 has RNA polymerase II transcription mediator activity, has role in transcription from RNA polymerase II promoter and localizes to mediator complex"
orf19.7420	"orf19.7420"	CD36_86330	0.0982082	-Inf	-Inf	"S. cerevisiae ortholog MED6 has RNA polymerase II transcription mediator activity, has role in transcription from RNA polymerase II promoter and localizes to mediator complex"
orf19.742	"ALD6"	NA	0.841784	NA	NA	"Putative aldehyde dehydrogenase; expression is regulated upon white-opaque switching; protein detected by mass spec in stationary phase cultures; transcription is upregulated in both intermediate and mature biofilms"
orf19.7419	"HNT2"	CD36_86130	0.384639	-4.98521	-5.36984	"Predicted ORF in Assemblies 19, 20 and 21; induced upon low-level peroxide stress"
orf19.7419	"HNT2"	CD36_86320	0.384639	-5.57017	-5.95481	"Predicted ORF in Assemblies 19, 20 and 21; induced upon low-level peroxide stress"
orf19.7417	"TSA1"	CD36_86140	NaN	NaN	NaN	"Protein of TSA/alkyl hydroperoxide peroxidase C (AhPC) family; similar to thiol-dependent peroxidases of oxidative stress signaling; antigenic; hyphal surface, nucleus; yeast-form nucleus, cytoplasm; biofilm, phagocytosis, peroxide induced"
orf19.7417	"TSA1"	CD36_86310	NaN	NaN	NaN	"Protein of TSA/alkyl hydroperoxide peroxidase C (AhPC) family; similar to thiol-dependent peroxidases of oxidative stress signaling; antigenic; hyphal surface, nucleus; yeast-form nucleus, cytoplasm; biofilm, phagocytosis, peroxide induced"
orf19.7414	"ALS6"	CD36_86290	0.678222	-3.22535	-3.90357	"ALS family protein; expression in S. cerevisiae confers adhesion to gelatin; macrophage-induced gene; N-terminal adhesion domain; ALS family includes cell-surface glycoproteins, some with adhesin function"
orf19.7413	"MMS21"	CD36_86280	1.1721	-1.70194	-2.87404	""
orf19.7412	"MUB1"	CD36_86270	-0.114243	-1.57858	-1.46434	"S. cerevisiae ortholog MUB1 has role in protein monoubiquitination, regulation of cell budding"
orf19.7411	"OAC1"	CD36_86260	0.362056	-1.65623	-2.01828	"Predicted ORF in Assemblies 19, 20 and 21; transcription is upregulated in both intermediate and mature biofilms"
orf19.7410	"orf19.7410"	CD36_86250	0.0968314	-0.401164	-0.497996	"S. cerevisiae ortholog CYM1 has metalloendopeptidase activity, has role in proteolysis involved in cellular protein catabolic process and localizes to mitochondrial intermembrane space"
orf19.741	"orf19.741"	NA	-0.436714	NA	NA	""
orf19.7409.1	"orf19.7409.1"	CD36_86240	0.58844	-3.22523	-3.81367	"S. cerevisiae ortholog MRPL39 has structural constituent of ribosome and localizes to mitochondrial large ribosomal subunit"
orf19.7409	"ERV25"	CD36_86230	0.809883	-0.605029	-1.41491	"Component of COPII-coated vesicles; transcription induced upon filamentous growth"
orf19.7406	"orf19.7406"	CD36_86220	0.973919	-0.430512	-1.40443	""
orf19.7405	"orf19.7405"	CD36_86210	0.559361	-3.43409	-3.99345	"Predicted ORF in Assemblies 19, 20 and 21; transcriptionally activated by Mnl1p under weak acid stress"
orf19.7404	"orf19.7404"	CD36_86200	0.211641	-3.78688	-3.99853	"S. cerevisiae ortholog CHA1 has L-threonine ammonia-lyase activity, L-serine ammonia-lyase activity, has role in threonine catabolic process, L-serine catabolic process and localizes to mitochondrial nucleoid"
orf19.7403	"orf19.7403"	CD36_86190	-0.155367	-0.407657	-0.25229	"Ortholog of S. cerevisiae YML020W"
orf19.7402	"DOT1"	CD36_86180	0.30554	-1.98115	-2.28669	""
orf19.7401	"ISW2"	CD36_86170	0.420242	-1.52278	-1.94302	"Protein required for chlamydospore formation, not essential for viability; repressed upon high-level peroxide stress; similar to S. cerevisiae Isw2p, which is an ATPase involved in chromatin remodeling"
orf19.7400	"ALS7"	CD36_86150	0.750121	-3.46918	-4.2193	"ALS family protein; hypermutable contingency gene; growth-regulated, downregulated in biofilm; two variable repeat regions; expression in S. cerevisiae does not confer adhesiveness; ALS family includes adhesins, cell-surface glycoproteins"
orf19.740	"HAP41"	NA	0.0744251	NA	NA	"Predicted ORF in Assemblies 19, 20 and 21; not required for response to low iron; transcriptionally activated by Mnl1p under weak acid stress"
orf19.74	"SEC5"	CD36_64960	0.35218	1.19619	0.844011	"Predicted exocyst component; ortholog of S. cerevisiae Sec5p; merged with orf19.75 in Assembly 21"
orf19.7398.1	"TSA1B"	NA	NaN	NA	NA	"Putative peroxidase; orf19.7398.1 is contig-truncated fragment of gene identical to TSA1; Tsa1p and Tsa1Bp role under oxidative/reductive stress, hyphal cell wall formation; in hyphal nucleus, cell wall; yeast-form nucleus, cytoplasm"
orf19.7398	"orf19.7398"	CD36_86090	NaN	NaN	NaN	"Predicted ORF in Assemblies 19, 20 and 21; decreased expression in response to prostaglandins"
orf19.7397.3	"orf19.7397.3"	NA	NaN	NA	NA	"Predicted ORF identical to orf19.7420"
orf19.7397.1	"orf19.7397.1"	NA	NaN	NA	NA	"Predicted ORF identical to NSA2"
orf19.7397	"orf19.7397"	CD36_86080	0.516224	-0.955342	-1.47157	"S. cerevisiae ortholog YPR022C has sequence-specific DNA binding and localizes to cytoplasm, nucleus"
orf19.7396	"orf19.7396"	CD36_86070	0.342518	-1.83908	-2.1816	""
orf19.7395	"orf19.7395"	NA	1.9556	NA	NA	""
orf19.7394	"GDA1"	CD36_86050	0.515879	-1.07855	-1.59443	"Golgi membrane GDPase, required for wild-type O-mannosylation, not N-glycosylation; required for wild-type hyphal induction, cell wall, and cell surface charge; not required for HeLa cell adherence; functional homolog of S. cerevisiae Gda1p"
orf19.7393	"orf19.7393"	CD36_86040	0.397868	-3.16963	-3.5675	"S. cerevisiae ortholog UTR1 has NAD+ kinase activity, NADH kinase activity, has role in NADP biosynthetic process, cellular iron ion homeostasis and localizes to cytoplasm, nucleus"
orf19.7392	"orf19.7392"	CD36_86030	-0.62031	-1.11627	-0.495963	"S. cerevisiae ortholog DED1 has ATP-dependent RNA helicase activity, RNA strand annealing activity and has role in translational initiation"
orf19.7391	"OCH1"	CD36_86020	0.826546	-3.87257	-4.69912	"alpha-1,6-mannosyltransferase; initiates N-glycan outer chain branch addition; similar to S. cerevisiae Och1p; required for wild-type virulence in mouse intravenous infection; fungal-specific (no human or murine homolog)"
orf19.7389	"REV3"	CD36_86010	-0.272109	0.123871	0.39598	"S. cerevisiae ortholog REV3 has DNA-directed DNA polymerase activity, has role in error-free translesion synthesis, error-prone translesion synthesis and localizes to nuclear chromatin, zeta DNA polymerase complex, mitochondrion"
orf19.7388	"PBS2"	CD36_86000	0.642991	-1.09425	-1.73724	"MAPK kinase (MAPKK); role in osmotic and oxidative stress responses, oxidative stress adaptation; required for stress regulation of Hog1p localization and activity; functional homolog of S. cerevisiae Pbs2p"
orf19.7387	"ELP3"	CD36_85990	0.709357	0.605679	-0.103678	"S. cerevisiae ortholog ELP3 has histone acetyltransferase activity and has role in regulation of transcription from RNA polymerase II promoter, tRNA wobble uridine modification"
orf19.7386	"orf19.7386"	CD36_85980	1.98778	-2.76305	-4.75083	"S. cerevisiae ortholog MBA1 has ribosome binding and has role in inner mitochondrial membrane organization, aerobic respiration, protein insertion into mitochondrial membrane from inner side"
orf19.7385	"orf19.7385"	CD36_85970	-0.0653465	1.47474	1.54009	""
orf19.7384	"NOG1"	CD36_85960	0.05585	-2.15849	-2.21434	"Predicted ORF in Assemblies 19, 20 and 21; mutation confers hypersensitivity to 5-fluorocytosine (5-FC), 5-fluorouracil (5-FU), and tubercidin (7-deazaadenosine); decreased expression in response to prostaglandins"
orf19.7383	"MNN9"	CD36_85950	0.828078	-0.325567	-1.15365	"Protein of N-linked outer-chain mannan biosynthesis; mutant has defective cell wall; required for wild-type hyphal growth; mutant is hygromycin B sensitive and vanadate resistant; has N-terminal membrane-spanning segment (positions 18-34)"
orf19.7382	"CAM1"	CD36_85940	0.877656	-2.31163	-3.18929	"Putative translation elongation factor eEF1 gamma; protein level decreased in stationary phase cultures"
orf19.7381	"ZCF37"	CD36_85930	1.10461	-0.290186	-1.3948	"Predicted zinc-finger protein of unknown function; null mutant displays sensitivity to 5-fluorocytosine and to lithium chloride"
orf19.7380	"orf19.7380"	CD36_85920	0.195392	-3.39701	-3.5924	""
orf19.738	"MYO5"	CD36_44720	0.177732	0.307151	0.129419	"Class I myosin; nonessential; role in cortical actin patch polarity and polar budding; required for hyphal growth; regulatory phosphorylation on S366; downregulated on adherence to polystyrene; sole class I myosin in C. albicans"
orf19.7379	"FAA2"	CD36_85910	1.77083	2.5607	0.789871	"Predicted acyl CoA synthetase; expression is regulated upon white-opaque switching; transcription is upregulated in both intermediate and mature biofilms"
orf19.7378	"orf19.7378"	CD36_85900	0.230085	-0.603457	-0.833542	""
orf19.7377	"ASE1"	CD36_85890	0.738858	-1.14681	-1.88567	"Predicted ORF in Assemblies 19, 20 and 21; member of conserved Mcm1p regulon; periodic mRNA expression, peak at cell-cycle G2/M phase"
orf19.7376	"orf19.7376"	CD36_85880	0.994391	-3.34705	-4.34144	""
orf19.7375	"orf19.7375"	CD36_85870	1.3078	-0.114653	-1.42245	"Putative U1A component of the U1 snRNP, involved in splicing; contains two RNA recognition motifs (RRMs); ortholog of S. cerevisiae MUD1"
orf19.7374	"CTA4"	CD36_85860	-1.12334	-3.79814	-2.6748	"Predicted transcription factor involved in response to nitric oxide; downregulated upon adherence to polystyrene; induced by nitric oxide; transcriptionally activated by Mnl1p under weak acid stress"
orf19.7372	"MRR1"	CD36_85850	0.3941	-0.566118	-0.960219	"Regulator of MDR1 transcription; zinc-finger protein; gain-of-function mutations cause upregulation of MDR1 (which encodes plasma membrane multidrug efflux pump) and consequent multidrug resistance"
orf19.7371	"ZCF35"	CD36_85840	-0.182542	-1.37543	-1.19289	"Predicted zinc-cluster protein of unknown function"
orf19.7370	"orf19.7370"	CD36_85830	0.447216	-0.437504	-0.88472	"Member of family of putative 7-transmembrane, PQ loop-family of G-protein-coupled receptors (GPCRs) similar to S. pombe Stm1p"
orf19.7369	"orf19.7369"	CD36_85820	0.847382	-3.00267	-3.85005	"S. cerevisiae ortholog TRM12 has role in tRNA methylation, wybutosine biosynthetic process"
orf19.7368	"orf19.7368"	CD36_85810	0.76812	1.25124	0.483125	"S. cerevisiae ortholog PUB1 has mRNA binding, poly(U) RNA binding and has role in regulation of mRNA stability, stress granule assembly, nuclear-transcribed mRNA catabolic process, nonsense-mediated decay"
orf19.7367	"UBP1"	CD36_85800	-0.471375	-3.56388	-3.0925	"S. cerevisiae ortholog UBP1 has ubiquitin-specific protease activity and localizes to endoplasmic reticulum"
orf19.7366	"orf19.7366"	CD36_85790	0.366054	-2.78501	-3.15107	"S. cerevisiae ortholog YIL096C localizes to nucleolus"
orf19.7365	"orf19.7365"	CD36_85780	1.3111	-0.241362	-1.55246	"S. cerevisiae ortholog FYV10 has role in negative regulation of gluconeogenesis, anti-apoptosis, proteasomal ubiquitin-dependent protein catabolic process and localizes to GID complex, cytoplasm, nucleus"
orf19.7364	"orf19.7364"	CD36_85770	1.26373	1.49922	0.235495	""
orf19.7363	"KRE6"	CD36_85760	1.09146	-0.330519	-1.42198	"Protein of beta-1,6-glucan synthesis; essential; type II membrane protein; N-glycosylation sites; change in mRNA length, but not mRNA abundance, at yeast-hyphal transition; alkaline upregulated by Rim101p; induced on cell wall regeneration"
orf19.7362	"SKN1"	CD36_85750	1.65229	1.9229	0.270608	"Protein with predicted role in beta-1,6-glucan synthesis; probable N-glycosylated type II membrane protein; transcription and change in mRNA length induced by yeast-hyphal transition; transcription induced by Rim101p or caspofungin"
orf19.7361	"orf19.7361"	CD36_85740	1.04516	-1.68135	-2.7265	""
orf19.7360	"orf19.7360"	CD36_85730	0.902088	-0.512088	-1.41418	""
orf19.736	"SRB8"	CD36_44710	0.526404	-1.48273	-2.00913	"Ortholog of S. cerevisiae SRB8"
orf19.7359	"CRZ1"	CD36_85720	-0.0752571	-1.12111	-1.04585	"Putative C2H2 zinc-finger transcription factor; similar to S. cerevisiae calcineurin-regulated transcription factor Crz1p; mutant is fluconazole hypersensitive; likely to act downstream of calcineurin; not required for mouse virulence"
orf19.7358	"orf19.7358"	CD36_85710	0.881856	-4.89886	-5.78071	"S. cerevisiae ortholog SAM50 has protein channel activity and has role in protein import into mitochondrial outer membrane, protein complex assembly"
orf19.7357	"orf19.7357"	CD36_85700	-0.0781903	0.474185	0.552376	"S. cerevisiae ortholog CAB2 has role in coenzyme A biosynthetic process and localizes to cytoplasm, nucleus"
orf19.7356	"orf19.7356"	CD36_85690	-0.457033	-1.06854	-0.611509	""
orf19.7355	"SSN8"	CD36_85680	0.728872	0.613066	-0.115806	"Protein not essential for viability; similar to S. cerevisiae Ssn8p, which is a component of RNA polymerase II holoenzyme; mutants sensitive to hydrogen peroxide medium"
orf19.7354	"orf19.7354"	CD36_85670	0.219112	-2.834	-3.05311	"Predicted ORF in Assemblies 19, 20 and 21; caspofungin induced"
orf19.7353	"orf19.7353"	CD36_85660	1.94831	0.58784	-1.36047	"Ortholog of S. cerevisiae KIP3"
orf19.7350	"RCT1"	CD36_85650	0.336714	-0.234647	-0.571361	"Soluble protein in hyphae; fluconazole-induced; mRNA abundance is elevated in a cyr1 or ras1 null mutant and decreased mRNA abundance in an efg1 null mutant; regulated by Nrg1p, Tup1p, Tbf1p, Ssn6p"
orf19.7349	"CHS4"	CD36_85640	0.00169309	-1.33893	-1.34063	"Activator of Chs3p chitin synthase; required for wild-type wall chitin content, but not for hyphal growth; mutant resistant to Calcofluor white; prenylation and 2 transmembrane segments predicted; functional homolog of S. cerevisiae Chs4p"
orf19.7348	"orf19.7348"	NA	1.44371	NA	NA	""
orf19.7347	"orf19.7347"	CD36_85630	0.395332	-0.359841	-0.755173	"S. cerevisiae ortholog UBC6 has ubiquitin-protein ligase activity, has role in ER-associated protein catabolic process and localizes to endoplasmic reticulum membrane"
orf19.7345	"orf19.7345"	CD36_34760	0.985977	-0.825199	-1.81118	"S. cerevisiae ortholog YGR205W has ATP binding and localizes to cytoplasm, nucleus"
orf19.7344	"orf19.7344"	CD36_34750	-0.579586	0.358981	0.938567	"S. cerevisiae ortholog HDA3 has role in gene silencing by RNA, gene silencing involved in chronological cell aging, histone deacetylation, chromosome segregation, negative regulation of transcription from RNA polymerase II promoter"
orf19.7343	"orf19.7343"	CD36_34740	0.0902722	-3.56193	-3.6522	"S. cerevisiae ortholog PRP4 has role in nuclear mRNA splicing, via spliceosome and localizes to U4/U6 x U5 tri-snRNP complex"
orf19.7342	"AXL1"	CD36_34730	-0.438708	-2.58746	-2.14875	"Protein of unknown function, induced by alpha factor; transcription is upregulated in an RHE model of oral candidiasis and in clinical isolates from HIV+ patients with oral candidiasis"
orf19.7341.1	"orf19.7341.1"	NA	0.834284	NA	NA	""
orf19.7341	"orf19.7341"	CD36_34720	1.01126	-0.424803	-1.43606	"Predicted ORF in Assemblies 19, 20 and 21; ketoconazole-repressed"
orf19.7340	"orf19.7340"	NA	NaN	NA	NA	""
orf19.734	"GLK1"	CD36_32740	0.54651	-3.37398	-3.92049	"Putative glucokinase; transcription is regulated upon yeast-hyphal switch; transcriptionally regulated by Efg1p; fluconazole-induced; induced in core stress response; shows colony morphology-related gene regulation by Ssn6p"
orf19.7339	"BGL22"	CD36_34710	-0.861242	-3.66038	-2.79914	"Putative glucanase; induced during cell wall regeneration"
orf19.7337	"orf19.7337"	CD36_34700	0.224645	1.82412	1.59947	""
orf19.7336	"orf19.7336"	CD36_34690	Inf	Inf	5.08699	"Predicted membrane transporter, member of the drug:proton antiporter (14 spanner) (DHA2) family, major facilitator superfamily (MFS)"
orf19.7335	"PRE8"	CD36_34685	1.45645	2.42164	0.965198	"Protein described as alpha-2_sc subunit of proteasome; macrophage-induced protein; regulated by Gcn2p and Gcn4p; transcription is positively regulated by Tbf1p; protein detected by mass spec in stationary phase cultures"
orf19.7332	"ELF1"	CD36_34680	-0.634969	-1.14187	-0.506906	"Protein required for wild-type morphology, growth; Walker A and B (ATP/GTP binding) motifs, ABC transporter consensus; expressed in hyphal, pseudohyphal, and yeast form, upregulated in biofilm; S. pombe homolog is ABC ATPase of mRNA export"
orf19.7331	"FCY24"	CD36_34670	-0.721983	0.218956	0.940939	"Putative transporter; more similar to S. cerevisiae Tpn1p, which is a vitamin B6 transporter, than to purine-cytosine permeases; transcription is regulated by Nrg1p"
orf19.7330	"orf19.7330"	CD36_34667	NaN	Inf	Inf	"S. cerevisiae ortholog PET18 localizes to cytosol"
orf19.733	"orf19.733"	CD36_32750	0.369664	-3.33867	-3.70834	""
orf19.7329	"orf19.7329"	CD36_34665	0.966219	0.691194	-0.275024	"S. cerevisiae ortholog UBC7 has ubiquitin-protein ligase activity and has role in chromatin assembly or disassembly, ER-associated protein catabolic process, fungal-type cell wall organization"
orf19.7328	"orf19.7328"	CD36_34660	2.26088	1.74063	-0.520244	"Gene transcription regulated by Mig1p and Tup1p"
orf19.7327	"PHO88"	CD36_34655	1.6188	1.24913	-0.369672	"Protein with a role in phosphate transport; biofilm-regulated expression; amphotericin B repressed"
orf19.7326	"orf19.7326"	CD36_34650	1.01945	-1.12212	-2.14157	"S. cerevisiae ortholog RKM1 has protein-lysine N-methyltransferase activity, has role in peptidyl-lysine dimethylation and localizes to cytoplasm, nucleus"
orf19.7325	"SCO1"	CD36_34640	1.52791	-1.2658	-2.79371	"Putative copper transporter"
orf19.7324	"THI13"	CD36_34630	-0.268278	-1.31518	-1.0469	"Protein not essential for viability; similar to S. cerevisiae Thi13p, which is involved in synthesis of the thiamine precursor hydroxymethylpyrimidine; induced by nitric oxide in yhb1 mutant"
orf19.7323	"CBP1"	CD36_34620	0.336712	-0.749881	-1.08659	"Corticosteroid binding protein; transcription induced at late log-phase or upon adherence to polystyrene; not induced by corticosterone; contains a possible NAD/FAD binding region; regulated by Nrg1p, Tup1p"
orf19.7322	"orf19.7322"	CD36_34615	0.683458	1.0499	0.366436	"S. cerevisiae ortholog YPL225W localizes to ribosome, cytoplasm"
orf19.7321	"orf19.7321"	CD36_34610	0.735533	1.68269	0.947156	""
orf19.7320	"LIP7"	CD36_34600	0.885215	-0.0804541	-0.965669	"Probable lipase, part of a gene family whose members are differentially expressed during infection; lacks a signal sequence for secretion, unlike other family members; may have a role in nutrition or in creating an acidic microenvironment"
orf19.732	"orf19.732"	CD36_32760	2.15809	2.33468	0.176592	"Predicted ORF in Assemblies 19, 20 and 21; transcription is upregulated in both intermediate and mature biofilms"
orf19.7319	"SUC1"	CD36_34590	-0.116297	-1.25981	-1.14351	"Putative transcriptional regulator with N-terminal zinc finger; regulates alpha-glucosidase in C. albicans and S. cerevisiae; in S. cerevisiae, complements suc2 mutant sucrose utilization defect and mal13 mutant maltase defect"
orf19.7317	"UGA33"	CD36_34580	-0.285261	1.12156	1.40682	"Predicted zinc-finger protein of unknown function; has similarity to S. cerevisiae Uga3p, which is a transcription factor involved in the regulation of gamma-aminobutyrate metabolism genes"
orf19.7316	"orf19.7316"	CD36_34570	0.694249	0.147623	-0.546627	"Predicted ORF in Assemblies 19, 20 and 21; mutation confers hypersensitivity to 5-fluorocytosine (5-FC), 5-fluorouracil (5-FU), and tubercidin (7-deazaadenosine); induced by nitric oxide"
orf19.7314	"CDG1"	CD36_34565	-1.16455	-3.68917	-2.52462	"Protein described as similar to cysteine dioxygenases; expression is regulated upon white-opaque switching; transcription is upregulated in both intermediate and mature biofilms"
orf19.7313	"SSU1"	CD36_34560	-0.325122	-2.70564	-2.38051	"Protein similar to S. cerevisiae Ssu1p sulfite transport protein; transposon mutation affects filamentous growth; regulated by Gcn2p and Gcn4p; induced by nitric oxide"
orf19.7312	"ERG13"	CD36_34550	1.52543	0.623285	-0.902148	"Similar to S. cerevisiae ergosterol biosynthesis protein Erg13p; transposon mutation affects filamentous growth; repressed by amphotericin B, caspofungin; detected by mass spectometry in exponential and stationary phase cultures"
orf19.7311	"orf19.7311"	CD36_34545	-0.209707	-1.71821	-1.5085	""
orf19.7310	"orf19.7310"	CD36_34540	-0.321628	0.236621	0.55825	"Protein similar to S. cerevisiae Gin3p; transcription is upregulated in response to treatment with ciclopirox olamine; positively regulated by Sfu1p; Hog1p, fluconazole-downregulated"
orf19.731	"EMP46"	CD36_32800	2.00635	1.56273	-0.443619	"Protein similar to S. cerevisiae Emp46p; transcription is induced in response to alpha pheromone in SpiderM medium"
orf19.7308	"TUB1"	CD36_34530	1.83815	1.86854	0.030383	"Alpha-tubulin; gene has intron; complements cold-sensitivity of S. cerevisiae tub1 mutant; C. albicans has single alpha-tubulin gene, whereas S. cerevisiae has two (TUB1, TUB3); farnesol-upregulated in biofilm"
orf19.7307	"orf19.7307"	CD36_34525	0.986281	0.504508	-0.481773	"Putative oxidoreductase; similar to S. cerevisiae Yml125p; possible Kex2p substrate"
orf19.7306	"orf19.7306"	CD36_34520	0.697401	-3.38484	-4.08224	"Protein of aldo-keto reductase family; increased transcription associated with MDR1 overexpression, benomyl or long-term fluconazole treatment; overexpression does not affect drug or oxidative stress sensitivity"
orf19.7305	"orf19.7305"	CD36_34510	-0.0168103	0.223641	0.240451	""
orf19.7304	"orf19.7304"	CD36_34500	0.566082	-2.18258	-2.74866	"Putative protein of unknown function; expression is upregulated early upon infection of reconstituted human epithelium (RHE), while expression of the C. dubliniensis ortholog is not upregulated; not required for viability"
orf19.7303	"orf19.7303"	NA	2.27314	NA	NA	""
orf19.7301	"orf19.7301"	NA	2.33588	NA	NA	""
orf19.7300	"orf19.7300"	CD36_34495	0.38091	-3.00569	-3.3866	""
orf19.7300	"orf19.7300"	CD36_34490	0.38091	-4.23769	-4.6186	""
orf19.730	"orf19.730"	CD36_32810	0.343222	-1.39124	-1.73446	"S. cerevisiae ortholog RGD2 has Rho GTPase activator activity, has role in small GTPase mediated signal transduction and localizes to cytoplasm, cellular bud neck"
orf19.73	"orf19.73"	CD36_64950	0.242198	-3.08294	-3.32514	"S. cerevisiae ortholog TMA108 localizes to ribosome, cytoplasm"
orf19.7299.1	"orf19.7299.1"	NA	0.325127	NA	NA	""
orf19.7298	"CHS2"	CD36_34480	0.662266	-0.747662	-1.40993	"Chitin synthase; nonessential; required for wild-type chitin deposition in hyphae; transcription is regulated during dimorphic transition; Chs1p and Chs2p, but not Chs3p, are inhibited by the protoberberine HWY-289; fungal-specific"
orf19.7297	"orf19.7297"	CD36_34470	0.966334	-2.76926	-3.7356	"Predicted ORF in Assemblies 19, 20 and 21; Hog1p-induced; Gcn4p-regulated; protein level decreased in stationary phase cultures"
orf19.7296	"orf19.7296"	CD36_34460	-0.377567	-0.27328	0.104287	"Putative cation conductance protein; similar to stomatin mechanoreception protein; plasma-membrane localized; induced by Rgt1p"
orf19.7295	"orf19.7295"	CD36_34450	-0.0209635	-1.63827	-1.61731	""
orf19.7293	"MPS1"	CD36_34440	3.08685	0.966029	-2.12082	"Predicted ORF in Assemblies 19, 20 and 21; essential for growth; periodic mRNA expression, peak at cell-cycle S/G2 phase"
orf19.7292	"ARP2"	CD36_34430	1.68725	0.517375	-1.16988	"Putative component of the Arp2/3 complex; required for virulence, hyphal growth, and cell wall and cytoskeleton organization, but not for endocytosis; mutation confers hypersensitivity to cytochalasin D; regulated by Gcn2p and Gcn4p"
orf19.7291	"orf19.7291"	CD36_34420	1.05276	-3.23452	-4.28729	"S. cerevisiae ortholog GCD14 has tRNA (adenine-N1-)-methyltransferase activity, has role in tRNA methylation and localizes to nucleus, tRNA (m1A) methyltransferase complex"
orf19.7290	"orf19.7290"	NA	1.1148	NA	NA	"S. cerevisiae ortholog LSM1 has RNA cap binding, has role in deadenylation-dependent decapping of nuclear-transcribed mRNA and localizes to cytoplasmic mRNA processing body, mRNA cap binding complex"
orf19.729.1	"RGD3"	CD36_33170	0.0281403	-0.154904	-0.183044	"Putative Rho GTPase activating protein; fungal-specific (no human or murine homolog)"
orf19.729	"orf19.729"	CD36_33180	1.15261	1.26259	0.10998	"Protein similar to S. cerevisiae She3p; transposon mutation affects filamentous growth"
orf19.7288	"orf19.7288"	CD36_34410	0.230609	-4.01031	-4.24092	""
orf19.7286	"RPN7"	CD36_34400	0.826321	1.2492	0.422884	"Predicted ORF in Assemblies 19, 20 and 21; regulated by Gcn2p and Gcn4p; protein detected by mass spec in exponential and stationary phase cultures"
orf19.7285	"orf19.7285"	CD36_34390	0.158303	0.903998	0.745695	"Ortholog of S. cerevisiae PTI1"
orf19.7284	"ASR2"	NA	-1.46893	NA	NA	"Gene regulated by cAMP and by osmotic stress; greater mRNA abundance observed in a cyr1 or ras1 homozygous null mutant than in wild type; protein detected by mass spec in stationary phase cultures"
orf19.7283	"orf19.7283"	NA	-3.14352	NA	NA	""
orf19.7282	"PEX13"	CD36_34380	0.307252	-0.687042	-0.994294	"Protein required for peroxisomal protein import mediated by PTS1 and PTS2 targeting sequences; transcription is upregulated in an RHE model of oral candidiasis"
orf19.7281	"PDK2"	CD36_34370	0.435654	-0.736661	-1.17231	"Predicted ORF in Assemblies 19, 20 and 21; mutation confers hypersensitivity to amphotericin B"
orf19.7280	"orf19.7280"	NA	1.14825	NA	NA	""
orf19.728	"TSC11"	CD36_33190	0.626822	0.571505	-0.0553168	"Protein similar to S. cerevisiae Tsc11p which is involved in sphingolipid biosynthesis; transposon mutation affects filamentous growth"
orf19.7279.1	"orf19.7279.1"	NA	1.00898	NA	NA	""
orf19.7279	"orf19.7279"	CD36_34360	1.12941	-0.618668	-1.74808	"Ortholog of S. cerevisiae NIT2"
orf19.7278	"orf19.7278"	NA	NaN	NA	NA	"Similar to a region of the Tca2 (pCal) retrotransposon, which is present in strain hOG1042 as 50 to 100 copies of a linear dsDNA"
orf19.7277	"orf19.7277"	NA	-0.850003	NA	NA	"Predicted ORF in retrotransposon Zorro2 with similarity to zinc finger-containing retroviral nucleocapsid proteins; un-merged from orf19.7275 in a revision of Assembly 21 based on comparative genome analysis and new sequence data"
orf19.7276.1	"TLO4"	NA	1.46375	NA	NA	"Member of a family of telomere-proximal genes of unknown function; transcription is upregulated in an RHE model of oral candidiasis"
orf19.7275	"FGR24"	CD36_72500	-0.392859	-7.65515	-7.26229	"Protein encoded in retrotransposon Zorro2 with similarity to retroviral endonuclease-reverse transcriptase proteins; lacks an ortholog in S. cerevisiae; transposon mutation affects filamentous growth"
orf19.7274	"orf19.7274"	NA	0.000691748	NA	NA	"Predicted ORF in retrotransposon Zorro2 with similarity to retroviral reverse transcriptase proteins"
orf19.7272	"orf19.7272"	NA	-0.78358	NA	NA	"Predicted ORF in Assemblies 19, 20 and 21; transcription detected in high-resolution tiling array experiments"
orf19.7271	"orf19.7271"	NA	-0.198534	NA	NA	"Predicted ORF in Assemblies 19, 20 and 21; transcription detected in high-resolution tiling array experiments"
orf19.7270	"orf19.7270"	NA	-0.502114	NA	NA	""
orf19.727	"orf19.727"	NA	0.692569	NA	NA	"Predicted ORF in Assemblies 19, 20 and 21; member of a family encoded by FGR6-related genes in the RB2 repeat sequence"
orf19.7269	"orf19.7269"	CD36_73500	1.08609	2.17318	1.08709	"S. cerevisiae ortholog PAA1 has aralkylamine N-acetyltransferase activity, diamine N-acetyltransferase activity, has role in chromatin organization and localizes to cytoplasm"
orf19.7267	"orf19.7267"	CD36_73510	0.419492	-0.546654	-0.966146	"S. cerevisiae ortholog SAM35 has role in mitochondrial outer membrane translocase complex assembly, protein import into mitochondrial outer membrane and localizes to mitochondrial sorting and assembly machinery complex"
orf19.7266	"orf19.7266"	NA	-0.269095	NA	NA	""
orf19.7265	"orf19.7265"	CD36_73520	0.0110181	0.109562	0.0985437	""
orf19.7264	"orf19.7264"	NA	0.707728	NA	NA	"S. cerevisiae ortholog RPN11 has ubiquitin-specific protease activity and has role in protein deubiquitination, peroxisome fission, mitochondrial fission, proteasomal ubiquitin-dependent protein catabolic process"
orf19.7263	"orf19.7263"	NA	0.774341	NA	NA	"S. cerevisiae ortholog YFR006W localizes to cytoplasm"
orf19.7261	"orf19.7261"	CD36_13390	0.828255	0.735382	-0.0928728	"S. cerevisiae ortholog GDI1 has Rab GDP-dissociation inhibitor activity, has role in vesicle-mediated transport and localizes to membrane fraction, soluble fraction"
orf19.7260	"orf19.7260"	CD36_13380	0.959451	-1.01779	-1.97724	""
orf19.726	"PPZ1"	CD36_31870	0.182293	-0.920066	-1.10236	"Putative protein phosphatase of the Type 1 family (serine/threonine-specific), similar to S. cerevisiae Ppz1p"
orf19.7258	"DDI1"	CD36_13370	0.770834	1.48783	0.716996	"Predicted ORF in Assemblies 19, 20 and 21; macrophage/pseudohyphal-repressed"
orf19.7257	"orf19.7257"	CD36_13360	0.639531	0.787991	0.14846	"S. cerevisiae ortholog MLH3 has role in reciprocal meiotic recombination, mismatch repair and localizes to MutLbeta complex"
orf19.7255	"RPC10"	CD36_13350	0.817555	0.295121	-0.522434	"Predicted ORF in Assemblies 19, 20 and 21; flucytosine induced"
orf19.7254	"orf19.7254"	CD36_13340	0.743673	-0.72223	-1.4659	""
orf19.7252	"orf19.7252"	NA	0.148249	NA	NA	""
orf19.7251	"WSC4"	CD36_13330	-0.176146	-1.98833	-1.81219	"Transcription is specific to white cell type"
orf19.7250	"orf19.7250"	CD36_13320	0.315996	1.31067	0.994673	"S. cerevisiae ortholog YPI1 has phosphoprotein phosphatase inhibitor activity, has role in protein dephosphorylation, glycogen metabolic process and localizes to nucleus"
orf19.725	"orf19.725"	CD36_31880	1.63368	3.96789	2.33421	""
orf19.7247	"RIM101"	CD36_13310	-0.528509	-0.712964	-0.184455	"Transcription factor involved in alkaline pH response; required for alkaline-induced hyphal growth; role in virulence in mouse systemic infection; activated by C-terminal proteolytic cleavage; mediates both positive and negative regulation"
orf19.7245	"orf19.7245"	CD36_13300	1.35326	1.27222	-0.0810356	"S. cerevisiae ortholog SLM3 has tRNA (5-methylaminomethyl-2-thiouridylate)-methyltransferase activity, has role in mitochondrial tRNA thio-modification and localizes to mitochondrion"
orf19.7244	"orf19.7244"	CD36_13290	1.35996	0.921871	-0.438094	"Predicted ORF in Assemblies 19, 20 and 21; induced by nitric oxide in yhb1 mutant"
orf19.7243	"orf19.7243"	CD36_13280	0.453242	0.599974	0.146733	"S. cerevisiae ortholog DCD1 has dCMP deaminase activity, has role in pyrimidine nucleotide biosynthetic process and localizes to cytoplasm"
orf19.7242	"NCR1"	CD36_13270	0.560632	0.376085	-0.184547	"Transcription is regulated by Nrg1p and Mig1p; increased expression in response to prostaglandins"
orf19.7239	"orf19.7239"	CD36_13260	0.772149	-1.88517	-2.65732	""
orf19.7238	"NPL3"	CD36_13250	-0.130965	-2.43621	-2.30524	"Putative RNA-binding protein, ortholog of S. cerevisiae Npl3p; nuclear export is facilitated by Hmt1p; transcription is upregulated in an RHE model of oral candidiasis"
orf19.7237	"orf19.7237"	CD36_13240	0.313624	-1.27931	-1.59293	"S. cerevisiae ortholog BNA7 has arylformamidase activity and has role in NAD biosynthetic process"
orf19.7236	"TIF35"	CD36_13230	0.451594	-2.73546	-3.18705	"Putative translation initiation factor; genes encoding ribosomal subunits, translation factors, and tRNA synthetases are downregulated upon phagocytosis by murine macrophage"
orf19.7235	"orf19.7235"	CD36_13220	0.249271	-3.13238	-3.38165	"Predicted ORF in Assemblies 19, 20 and 21; mutation confers hypersensitivity to amphotericin B"
orf19.7234	"orf19.7234"	CD36_13210	1.01075	-0.997037	-2.00778	"Predicted ORF in Assemblies 19, 20 and 21; possibly an essential gene, disruptants not obtained by UAU1 method"
orf19.7232	"IRR1"	CD36_13200	1.59545	-0.950767	-2.54622	"Predicted ORF in Assemblies 19, 20 and 21; cell-cycle regulated periodic mRNA expression"
orf19.7231	"FTR2"	CD36_13190	0.439375	-3.81276	-4.25213	"High-affinity iron permease; not required for mouse systemic virulence; regulated by iron level, ciclopirox olamine, amphotericin B, caspofungin; complements S. cerevisiae ftr1 iron transport defect; probably interacts with ferrous oxidase"
orf19.723	"BCR1"	CD36_31890	0.234011	-1.63442	-1.86843	"C2H2 zinc finger transcription factor required for wild-type biofilm formation; mutation affects filamentous growth; regulates cell-surface-associated genes; filament induced; Tup1p-, Tec1p-, Mnl1p-regulated; mRNA binds to She3p"
orf19.7229	"IML2"	CD36_13180	0.120223	-0.332601	-0.452824	"S. cerevisiae ortholog YKR018C localizes to cytoplasm, nucleus"
orf19.7228	"orf19.7228"	CD36_13170	0.873742	0.431259	-0.442482	"Putative protein of unknown function, transcription is positively regulated by Tbf1p; mRNA binds to She3p"
orf19.7227	"orf19.7227"	CD36_13160	-0.259202	-0.859874	-0.600672	"Putative protein of unknown function; homozygous transposon insertion causes decreased colony wrinkling but does not block true hyphal formation in liquid media; mutation confers hypersensitivity to toxic ergosterol analog"
orf19.7225	"orf19.7225"	CD36_13150	0.126223	-0.0388645	-0.165087	""
orf19.7224	"orf19.7224"	CD36_13140	0.789411	-2.36457	-3.15398	"Ortholog of S. cerevisiae YKR017C"
orf19.7223	"orf19.7223"	CD36_13130	0.780965	-2.10922	-2.89018	"S. cerevisiae ortholog RKM3 has protein-lysine N-methyltransferase activity, has role in peptidyl-lysine monomethylation and localizes to nucleus"
orf19.7222	"PAM16"	CD36_13120	0.7298	0.783094	0.0532948	"Protein described as similar to maltase; regulated by Gcn4p; repressed in response to amino acid starvation (3-aminotriazole treatment); transcription is upregulated in both intermediate and mature biofilms"
orf19.7221	"SET3"	CD36_13110	0.25591	1.09318	0.837267	"Putative NAD-dependent histone deacetylase; mutations affect filamentous growth; genetic evidence suggests that Set3p and Hos2p function together as a complex involved in regulation of white-opaque switching, morphogenesis, and virulence"
orf19.7219	"FTR1"	CD36_13100	1.75096	-2.54357	-4.29453	"High-affinity iron permease (ferric citrate, ferrioxamines E or B, transferrin); required for mouse virulence, low-iron growth; iron, amphotericin B, caspofungin, ciclopirox, Hog1p regulated; complements S. cerevisiae ftr1 iron transport"
orf19.7218	"RBE1"	CD36_13090	0.597234	-3.88781	-4.48504	"Putative cell wall protein; transcription is negatively regulated by Rim101p, Efg1p, Ssn6p; alkaline downregulated; predicted signal sequence, O-glycosylation; no GPI anchor predicted; ketoconazol upregulated"
orf19.7217	"RPL4B"	CD36_13080	0.828765	-1.21107	-2.03983	"Ribosomal protein 4B; genes encoding cytoplasmic ribosomal subunits, translation factors, and tRNA synthetases are downregulated upon phagocytosis by murine macrophage"
orf19.7216	"orf19.7216"	CD36_13070	1.0814	0.900738	-0.180658	"S. cerevisiae ortholog YPT52 has GTPase activity, has role in protein targeting to vacuole, endocytosis and localizes to late endosome"
orf19.7215.3	"orf19.7215.3"	NA	1.14026	NA	NA	"S. cerevisiae ortholog HSP10 has chaperone binding, unfolded protein binding, has role in protein refolding and localizes to mitochondrial matrix"
orf19.7215	"orf19.7215"	CD36_13050	-0.264644	-3.402	-3.13735	"Ortholog of S. cerevisiae UTP10"
orf19.7214	"orf19.7214"	CD36_13040	0.883894	0.0830498	-0.800844	"Similar to glucan 1,3-beta-glucosidase; regulated by Nrg1p, Tup1p and possibly by Tac1p; induced upon biofilm formation, nitric oxide and during cell wall regeneration; detected by mass spec in stationary phase; possibly an essential gene"
orf19.7213	"orf19.7213"	CD36_13030	0.980162	-1.72385	-2.70401	"Putative ATP-dependent RNA helicase; fungal-specific (no human or murine homolog)"
orf19.7212	"orf19.7212"	CD36_13020	-0.433947	-1.43747	-1.00353	"Phosphorylated protein of unknown function; homozygous transposon insertion causes decreased colony wrinkling under filamentous growth-inducing conditions, but does not block true hyphal formation in liquid media"
orf19.7210	"orf19.7210"	CD36_13010	0.971616	2.2973	1.32568	"S. cerevisiae ortholog YJR008W localizes to cytoplasm, nucleus"
orf19.721	"orf19.721"	CD36_31920	0.226141	-1.59708	-1.82322	"S. cerevisiae ortholog GRC3 has polynucleotide 5'-hydroxyl-kinase activity, has role in termination of RNA polymerase I transcription, rRNA processing and localizes to nucleolar chromatin"
orf19.7209	"orf19.7209"	CD36_13000	0.985977	2.4114	1.42542	"Predicted ORF in Assemblies 19, 20 and 21; induced by nitric oxide in yhb1 mutant"
orf19.7208	"CSK1"	CD36_12990	NaN	Inf	Inf	"Putative mitogen-activated protein (MAP) kinase with an unknown role; null mutant produces wrinkled colonies; similar to S. cerevisiae Smk1p, which is a protein kinase required for sporulation"
orf19.7207	"DOA4"	CD36_12980	0.634117	0.361743	-0.272373	"Protein not essential for viability; similar to S. cerevisiae Doa4p, which is ubiquitin hydrolase, involved in recycling ubiquitin from proteasome-bound ubiquitinated intermediates; oxidative stress-induced via Cap1p"
orf19.7206	"OCA6"	CD36_12970	0.45203	0.074364	-0.377666	"Putative protein phosphatase of the PTP family (tyrosine-specific), similar to S. cerevisiae Oca6p; mutant shows virulence defect"
orf19.7205	"DUR7"	CD36_12960	-0.150072	-0.543407	-0.393334	"Putative urea transporter; fungal-specific (no human or murine homolog)"
orf19.7204	"orf19.7204"	CD36_73440	0.913094	0.926574	0.013481	"S. cerevisiae ortholog YJR149W localizes to cytoplasm"
orf19.7203	"orf19.7203"	CD36_73450	1.44037	-1.28597	-2.72634	"S. cerevisiae ortholog MRP7 has structural constituent of ribosome and localizes to mitochondrial large ribosomal subunit"
orf19.7202	"orf19.7202"	CD36_73460	0.744232	-0.733874	-1.47811	"S. cerevisiae ortholog RER1 has role in retrograde vesicle-mediated transport, Golgi to ER, protein retention in ER lumen, ER to Golgi vesicle-mediated transport and localizes to ER to Golgi transport vesicle, COPI-coated vesicle"
orf19.7201	"SLA2"	CD36_73470	0.366812	-1.70249	-2.0693	"Actin binding protein with roles in growth control and morphogenesis; required for alkaline pH-induced hyphal formation; localized to actin patches"
orf19.7200	"orf19.7200"	CD36_73480	-0.157659	-1.8928	-1.73514	""
orf19.720	"GST3"	CD36_31940	0.733211	1.87072	1.13751	"Expression is regulated upon white-opaque switching; upregulated in the presence of human neutrophils; peroxide-induced; induced in response to alpha pheromone in SpiderM medium"
orf19.7199	"orf19.7199"	CD36_73490	-0.42402	-0.316736	0.107284	"S. cerevisiae ortholog YBR137W localizes to cytoplasm"
orf19.7198	"orf19.7198"	CD36_73530	0.211259	-0.0743557	-0.285614	"S. cerevisiae ortholog CAF40 has role in regulation of transcription from RNA polymerase II promoter and localizes to CCR4-NOT core complex"
orf19.7197	"orf19.7197"	CD36_73540	-0.11925	-4.04649	-3.92724	"Putative protein of unknown function; heterozygous null mutant exhibits resistance to parnafungin in the C. albicans fitness test"
orf19.7196	"orf19.7196"	CD36_73550	1.04091	0.992818	-0.0480884	"Protein described as a vacuolar protease; upregulated in the presence of human neutrophils"
orf19.7195	"RAD6"	CD36_73560	-0.510754	-1.04702	-0.536262	"Negative regulator of hyphal growth; required for wild-type UV resistance; acts in pathway with Efg1p ; functional homolog of S. cerevisiae Rad6p; transcription is UV-induced, slightly repressed during hyphal growth; gene has two introns"
orf19.7194	"orf19.7194"	CD36_73570	0.46675	-4.24181	-4.70855	"Protein not essential for viability; decreased transcription is observed upon fluphenazine treatment; induced upon adherence to polystyrene"
orf19.7193	"orf19.7193"	CD36_73580	0.366625	-0.396094	-0.76272	"S. cerevisiae ortholog SSH4 has role in protein targeting to vacuole involved in ubiquitin-dependent protein catabolic process via the multivesicular body sorting pathway and localizes to fungal-type vacuole"
orf19.7192	"orf19.7192"	NA	NaN	NA	NA	""
orf19.7190	"OGG1"	CD36_73590	1.28708	-0.0299453	-1.31702	"S. cerevisiae ortholog OGG1 has oxidized purine base lesion DNA N-glycosylase activity, has role in base-excision repair, AP site formation and localizes to mitochondrion"
orf19.719	"orf19.719"	CD36_31960	0.0145781	-1.66161	-1.67619	"S. cerevisiae ortholog HRD1 has ubiquitin-protein ligase activity and has role in ER-associated protein catabolic process, fungal-type cell wall organization"
orf19.7188	"RPP1B"	CD36_73600	0.446091	-3.47061	-3.9167	"Conserved acidic ribosomal protein, likely to be involved in regulation of translation elongation; interacts with Rpp2Ap; one of four similar C. albicans ribosomal proteins (Rpp1Ap, Rpp1Bp, Rpp2Ap, Rpp2Bp); transcription activated by Tbf1p"
orf19.7187	"MAM33"	CD36_73610	1.04703	-3.14962	-4.19665	"Predicted ORF in Assemblies 19, 20 and 21; regulated by Ssn6p; protein detected by mass spec in exponential and stationary phase cultures"
orf19.7186	"CLB4"	CD36_73620	0.921206	-0.566283	-1.48749	"B-type mitotic cyclin; nonessential; negative regulator of pseudohyphal growth; dispensible for mitotic exit, cytokinesis; increased CLB4 transcript detected in fkh2 mutant; farnesol-upregulated in biofilm; reduced total RNA in clb4 mutant"
orf19.7185	"orf19.7185"	CD36_73630	-0.266432	-1.57438	-1.30795	""
orf19.7184	"orf19.7184"	CD36_73640	0.955201	0.901792	-0.0534089	""
orf19.7183	"orf19.7183"	CD36_73650	0.933744	-2.09956	-3.03331	"S. cerevisiae ortholog EMC4 has role in protein folding in endoplasmic reticulum and localizes to endoplasmic reticulum"
orf19.7182	"orf19.7182"	CD36_73660	1.03799	-1.8866	-2.92459	"S. cerevisiae ortholog TAN1 has RNA binding, has role in tRNA modification and localizes to cytoplasm, nucleus"
orf19.7181	"orf19.7181"	CD36_73670	0.563286	-2.64063	-3.20392	""
orf19.718	"RRN11"	CD36_31980	0.986638	-2.21961	-3.20625	"Putative RNA polymerase I subunit; transcription is upregulated in both intermediate and mature biofilms"
orf19.7179	"orf19.7179"	CD36_73680	0.431081	-0.759299	-1.19038	""
orf19.7178	"PRE5"	CD36_73690	0.401889	0.821159	0.41927	"Alpha6 subunit of the 20S proteasome; regulated by Gcn4p; induced in response to amino acid starvation (3-aminotriazole treatment)"
orf19.7177	"KAP120"	CD36_73700	0.194936	-0.392492	-0.587429	"Predicted ORF in Assemblies 19, 20 and 21; mutation confers hypersensitivity to cytochalasin D"
orf19.7176	"NPT1"	CD36_73710	0.71722	0.435121	-0.2821	"Putative nicotinate phosphoribosyltransferase, involved in NAD salvage pathway; fungal-specific (no human or murine homolog)"
orf19.7175	"HLJ1"	CD36_73720	0.584512	-0.667806	-1.25232	"Protein repressed during the mating process"
orf19.7173	"orf19.7173"	CD36_73730	0.0996688	0.565587	0.465918	""
orf19.7170	"orf19.7170"	CD36_73740	NaN	NaN	NaN	""
orf19.717	"HSP60"	CD36_31990	0.865633	-2.07186	-2.9375	"Protein described as mitochondrial heat shock protein; soluble protein in hyphae; transcription is regulated by Nrg1p; transcriptionally regulated by iron; expression greater in high iron; heavy metal (cadmium) stress-induced"
orf19.7167	"orf19.7167"	CD36_73750	-Inf	-1.75221	Inf	""
orf19.7166	"orf19.7166"	CD36_73760	0.602071	-0.56897	-1.17104	"Predicted ORF in Assemblies 19, 20 and 21; increased transcription is observed in an azole-resistant strain that overexpresses MDR1; transcriptionally activated by Mnl1p under weak acid stress"
orf19.7165	"orf19.7165"	CD36_73770	0.355123	0.646317	0.291193	""
orf19.7164	"orf19.7164"	CD36_73780	1.29353	1.57446	0.280931	"S. cerevisiae ortholog YPL236C localizes to fungal-type vacuole membrane"
orf19.7163	"orf19.7163"	CD36_73790	1.78296	4.20495	2.42198	""
orf19.7161	"SUI3"	CD36_73800	0.0673182	-0.915841	-0.983159	"Putative translation initiation factor; genes encoding ribosomal subunits, translation factors, and tRNA synthetases are downregulated upon phagocytosis by murine macrophage"
orf19.7160	"orf19.7160"	CD36_73810	0.794002	-0.55817	-1.35217	"S. cerevisiae ortholog YAR1 has role in ribosomal small subunit biogenesis, cellular response to oxidative stress, response to osmotic stress and localizes to cytoplasm"
orf19.716	"orf19.716"	CD36_32000	1.43487	0.311705	-1.12316	"Predicted ORF in Assemblies 19, 20 and 21; regulated by Nrg1p, Tup1p; transcription is repressed in response to alpha pheromone in SpiderM medium"
orf19.7159	"orf19.7159"	CD36_73820	-0.0118556	-2.22102	-2.20917	"Ortholog of S. cerevisiae YMR185W"
orf19.7158	"orf19.7158"	CD36_73830	0.824728	2.61414	1.78941	"Protein of allantoate permease family; fungal-specific (no human or murine homolog)"
orf19.7157	"orf19.7157"	CD36_73840	0.482668	0.992262	0.509594	""
orf19.7156	"FAA2-3"	CD36_73850	1.00816	0.498906	-0.509251	"Predicted acyl CoA synthetase"
orf19.7154	"UTP18"	CD36_73860	0.65165	-3.45848	-4.11013	"Predicted ORF in Assemblies 19, 20 and 21; downregulated during core stress response; physically interacts with TAP-tagged Nop1p"
orf19.7153	"orf19.7153"	CD36_73870	0.71433	-1.05989	-1.77422	"Putative exportin, member of the Exportin-T family"
orf19.7152	"orf19.7152"	CD36_73880	2.34367	-1.02395	-3.36762	"Protein similar to Aspergillus CYSK O-acetylserine sulfhydrylase, suggesting that C. albicans uses an O-acetyl-serine (OAS) pathway of sulfur assimilation; upregulated in biofilm; protein level decreased in stationary phase cultures"
orf19.7151	"orf19.7151"	NA	-Inf	NA	NA	""
orf19.7150	"NRG1"	CD36_73890	-4.37162	-4.97788	-0.606257	"Transcriptional repressor; regulates hyphal genes, virulence genes, chlamydospore development, and genes involved in rescue and stress responses; effects both Tup1p-dependent (major) and -independent (minor) regulation"
orf19.715	"orf19.715"	CD36_32010	0.907839	-4.52652	-5.43436	""
orf19.7149	"orf19.7149"	CD36_73900	1.44131	-0.366652	-1.80796	""
orf19.7148	"TPO2"	CD36_73910	0.668027	1.47054	0.802516	"Putative polyamine transport protein; fungal-specific (no human or murine homolog)"
orf19.7144	"orf19.7144"	CD36_73920	0.512386	-0.612916	-1.1253	"S. cerevisiae ortholog HBS1 has role in nonfunctional rRNA decay, nuclear-transcribed mRNA catabolic process, no-go decay, translation and localizes to cytoplasm"
orf19.7141	"UFE1"	CD36_73930	0.627992	0.0976492	-0.530343	"Protein interacting with Sec20p, possibly involved in retrograde transport between the Golgi and the endoplasmic reticulum; functional homolog of S. cerevisiae Ufe1p, which is an ER t-SNARE that mediates the retrograde traffic"
orf19.7140	"orf19.7140"	CD36_73940	0.928065	2.64112	1.71305	"Putative protein of unknown function, transcription is upregulated in clinical isolates from HIV+ patients with oral candidiasis; protein detected by mass spec in stationary phase cultures"
orf19.714	"orf19.714"	CD36_32020	1.79024	3.00152	1.21128	"S. cerevisiae ortholog YPT6 has GTPase activity and has role in intracellular protein transport, retrograde transport, endosome to Golgi"
orf19.7139	"orf19.7139"	CD36_73950	0.180637	2.36736	2.18672	""
orf19.7136	"SPT6"	CD36_73960	-0.301474	-1.52654	-1.22507	"Protein similar to S. cerevisiae Spt6p transcription elongation factor; transposon mutation affects filamentous growth; transcription is upregulated in an RHE model of oral candidiasis and in clinical isolates from oral candidiasis"
orf19.7131	"orf19.7131"	CD36_73970	0.801517	0.163746	-0.637771	"Butyrobetaine dioxygenase, the fourth enzyme of the carnitine biosynthesis pathway"
orf19.7130	"orf19.7130"	CD36_73980	0.955604	-2.54834	-3.50395	""
orf19.713	"orf19.713"	CD36_32030	0.299247	-0.855131	-1.15438	"S. cerevisiae ortholog YMR074C has role in apoptosis and localizes to cytoplasm, nucleus"
orf19.7128	"SYS1"	CD36_73990	0.616636	-1.41372	-2.03036	"Predicted ORF in Assemblies 19, 20 and 21; transcription is regulated by Mig1p"
orf19.7127.1	"orf19.7127.1"	NA	2.47018	NA	NA	"Putative protein of unknown function, transcription is upregulated in an RHE model of oral candidiasis"
orf19.7127	"TLO16"	NA	0.292639	NA	NA	"Member of a family of telomere-proximal genes of unknown function; may be spliced in vivo"
orf19.7125	"orf19.7125"	CD36_70220	0.0370515	-0.111475	-0.148527	""
orf19.7124	"RVS161"	CD36_70230	-0.256825	-0.787009	-0.530184	"Protein required for endocytosis; contains a BAR domain, which is found in proteins involved in membrane curvature; null mutant exhibits defects in hyphal growth, virulence, cell wall integrity, and actin patch localization"
orf19.7123	"orf19.7123"	CD36_70240	0.387641	-0.544184	-0.931825	""
orf19.7121	"orf19.7121"	CD36_70250	0.419032	-2.54114	-2.96018	""
orf19.712	"KIP1"	CD36_32050	0.283904	0.443807	0.159903	"Non-essential kinesin from the bipolar (Kinesis-5) family; involved in formation of the mitotic spindle"
orf19.7119	"orf19.7119"	CD36_70260	-0.162755	-2.08688	-1.92412	"Ortholog of S. cerevisiae RAD3"
orf19.7118	"orf19.7118"	CD36_70270	0.421389	-0.355995	-0.777385	"S. cerevisiae ortholog ADK2 has nucleoside triphosphate adenylate kinase activity, adenylate kinase activity, has role in nucleotide metabolic process and localizes to mitochondrial inner membrane"
orf19.7116	"orf19.7116"	CD36_70280	0.0105249	-2.27682	-2.28735	"Putative protein of unknown function, transcription is upregulated in an RHE model of oral candidiasis"
orf19.7115	"SAC7"	CD36_70290	0.626414	-0.0573927	-0.683807	"Protein described as a GTPase activating protein (GAP) for RHO1; downregulated upon adherence to polystyrene; macrophage/pseudohyphal-repressed; transcription is upregulated in RHE model of oral candidiasis and in clinical oral candidiasis"
orf19.7114	"CSA1"	CD36_70300	0.828312	-2.26196	-3.09027	"Surface antigen on elongating hyphae and buds; no obvious hyphal defects in mutant; strain variation in number of repeat domains; upregulated in filaments; alkaline upregulated by Rim101p; ciclopirox induced; Efg1p- and Cph1p-regulated"
orf19.7112	"FRP2"	CD36_70310	0.0610065	-5.87842	-5.93943	"Protein described as ferric reductase; alkaline upregulated by Rim101p; fluconazole-downregulated; upregulated in the presence of human neutrophils; possibly adherence-induced"
orf19.7111.1	"SOD3"	CD36_70320	-0.525523	2.70988	3.23541	"Cytosolic manganese-containing superoxide dismutase, involved in protection against oxidative stress; transcription downregulated by treatment with ciclopirox olamine, induced during stationary phase when SOD1 expression is repressed"
orf19.7111	"orf19.7111"	CD36_70330	0.384648	2.63567	2.25102	"Predicted ORF in Assemblies 19, 20 and 21; possibly an essential gene, disruptants not obtained by UAU1 method"
orf19.7110	"orf19.7110"	CD36_70340	1.32607	2.2526	0.926534	"S. cerevisiae ortholog TAD1 has tRNA-specific adenosine-37 deaminase activity, has role in tRNA modification and localizes to nucleus"
orf19.711	"orf19.711"	NA	-0.716096	NA	NA	"Predicted ORF from Assembly 19; induced by nitric oxide; removed from Assembly 20; restored based on transcription data"
orf19.7109	"orf19.7109"	CD36_70350	0.937829	-1.15451	-2.09234	"Ortholog of S. cerevisiae YGL242C"
orf19.7108	"orf19.7108"	CD36_70360	0.482763	-0.846566	-1.32933	"Predicted ORF in Assemblies 19, 20 and 21; protein detected by mass spec in stationary phase cultures"
orf19.7107	"orf19.7107"	CD36_70370	0.672047	-2.08089	-2.75294	"S. cerevisiae ortholog ALB1 has role in ribosomal large subunit biogenesis and localizes to ribosome, cytoplasm, nucleus"
orf19.7106	"orf19.7106"	CD36_70380	0.480582	-0.232414	-0.712996	"S. cerevisiae ortholog VPS70 has role in protein targeting to vacuole"
orf19.7105	"FAR1"	CD36_70390	0.633676	5.31616	4.68249	"Protein involved in regulation of pheromone-mediated mating; repressed by A1p and Alpha2p in white-phase cells; null mutant shows no pheromone response in opaque cells; overexpression causes enhanced pheromone response and cell cycle arrest"
orf19.7104	"orf19.7104"	CD36_70400	0.939002	-0.626909	-1.56591	"Predicted ORF in Assemblies 19, 20 and 21; similar to mucins and to a Litomosoides microfilarial sheath protein"
orf19.7103	"orf19.7103"	CD36_70410	0.0926806	-1.63403	-1.72671	""
orf19.7102	"orf19.7102"	CD36_70430	0.039996	-2.80532	-2.84532	""
orf19.7101	"orf19.7101"	CD36_70420	-0.0136019	0.0635956	0.0771976	""
orf19.7100	"orf19.7100"	CD36_70440	1.92207	1.15199	-0.770076	"Predicted ORF in Assemblies 19, 20 and 21; possibly transcriptionally regulated upon hyphal formation"
orf19.71	"orf19.71"	CD36_03440	1.40115	0.860392	-0.540758	""
orf19.7098	"orf19.7098"	CD36_70450	1.36237	-0.158391	-1.52076	"Predicted ORF in Assemblies 19, 20 and 21; repressed by nitric oxide"
orf19.7097	"orf19.7097"	CD36_70460	0.0926879	0.484179	0.391491	"Putative protein of unknown function; heterozygous null mutant exhibits hypersensitivity to parnafungin and cordycepin in the C. albicans fitness test"
orf19.7096	"orf19.7096"	CD36_70470	-0.459727	-1.7527	-1.29297	"S. cerevisiae ortholog YLR001C localizes to fungal-type vacuole membrane, mitochondrion"
orf19.7095	"orf19.7095"	CD36_70480	-0.187003	-1.47801	-1.291	"Ortholog of S. cerevisiae YOR390W and YPL279C"
orf19.7094	"HGT12"	CD36_70490	1.84498	1.00537	-0.839604	"Glucose, fructose, mannose transporter; major facilitator superfamily; role in macrophage-induced hyphal growth; detected at germ tube plasma membrane by mass spectrometry; Snf3p-induced; 12 probable transmembrane segments"
orf19.7093	"HGT13"	CD36_70500	-0.851751	-1.86308	-1.01133	"Predicted sugar transporter, involved in glycerol utilization; member of the major facilitator superfamily; 12 transmembrane; gene has intron; oxidative stress-induced via Cap1p; expressed in rich medium, 2% glucose"
orf19.7092	"orf19.7092"	CD36_70510	0.22338	0.434993	0.211613	"S. cerevisiae ortholog YLR290C localizes to mitochondrion"
orf19.7091	"orf19.7091"	CD36_70520	2.01692	-1.35848	-3.3754	"Predicted ORF in Assemblies 19, 20 and 21; induced by nitric oxide"
orf19.709	"PUP2"	CD36_32290	0.932182	2.00206	1.06988	"Alpha5 subunit of the 20S proteasome; macrophage/pseudohyphal-repressed; regulated by Gcn2p and Gcn4p; protein detected by mass spec in exponential and stationary phase cultures"
orf19.7089	"PMR1"	CD36_70530	0.241399	-0.488916	-0.730316	"Putative secretory pathway P-type Ca2+/Mn2+-ATPase; required for protein glycosylation and cell wall maintenance; required for hyphal tip oscillation in semisolid substrate; putative ortholog of S. cerevisiae PMR1"
orf19.7088	"orf19.7088"	CD36_70540	0.4443	-2.98746	-3.43176	"S. cerevisiae ortholog SUA5 has single-stranded telomeric DNA binding, has role in tRNA modification, telomere maintenance and localizes to cytoplasm"
orf19.7086	"orf19.7086"	CD36_70550	0.0244427	-1.75037	-1.77481	"S. cerevisiae ortholog KAP114 has protein transporter activity, has role in transcription factor import into nucleus and localizes to cytoplasm, nucleus"
orf19.7085	"orf19.7085"	CD36_70560	-1.39553	-1.61919	-0.223656	"Predicted ORF in Assemblies 19, 20 and 21; induced in core stress response; induced by heavy metal (cadmium) stress via Hog1p; oxidative stress-induced via Cap1p; induced by Mnl1p under weak acid stress; macrophage-downregulated"
orf19.7084	"DFI1"	CD36_70570	0.0556268	-1.63371	-1.68934	"Cell-surface associated glycoprotein; promotes activation of Cek1p in a matrix-dependent manner; N-glycosylated"
orf19.7083	"DCC1"	CD36_70580	1.08685	0.674433	-0.412415	"Predicted ORF in Assemblies 19, 20 and 21; cell-cycle regulated periodic mRNA expression"
orf19.7082	"orf19.7082"	CD36_70590	0.658283	0.158813	-0.49947	"S. cerevisiae ortholog PET8 has S-adenosylmethionine transmembrane transporter activity, has role in S-adenosylmethionine transport and localizes to mitochondrion"
orf19.7081	"SPL1"	CD36_70600	0.472084	0.619329	0.147245	"Protein similar to S. cerevisiae Spl1p, which is involved in tRNA splicing; member of pyridoxal-phosphate-dependent aminotransferase protein family; predicted to be essential"
orf19.7080	"LEU2"	CD36_70610	0.404938	1.00729	0.602355	"Isopropyl malate dehydrogenase; enzyme of leucine biosynthesis; upregulated in the presence of human whole blood or polymorphonuclear (PMN) cells; protein level decreased in stationary phase cultures"
orf19.708	"orf19.708"	CD36_32280	0.914935	-3.11016	-4.02509	"S. cerevisiae ortholog SPC97 has structural constituent of cytoskeleton and localizes to inner plaque of spindle pole body, outer plaque of spindle pole body, gamma-tubulin small complex, spindle pole body"
orf19.7079	"orf19.7079"	CD36_70620	1.24136	-0.181702	-1.42306	""
orf19.7078	"orf19.7078"	CD36_65270	-0.0700231	2.60721	2.67723	"Ortholog of S. cerevisiae YCL012C"
orf19.7077	"orf19.7077"	CD36_70210	0.238004	0.0297647	-0.208239	"Putative ferric reductase; transcription is activated by Mac1p under copper starvation; Plc1p-regulated; transcription is negatively regulated by Rim101p"
orf19.7076	"orf19.7076"	CD36_70200	0.295341	-3.37835	-3.67369	"Predicted ORF in Assemblies 19, 20 and 21; protein level decreased in stationary phase cultures"
orf19.7074	"orf19.7074"	CD36_70190	0.34958	-0.0351732	-0.384753	"S. cerevisiae ortholog SGF29 has role in histone acetylation and localizes to SAGA complex"
orf19.7073	"orf19.7073"	CD36_70180	2.37064	0.373004	-1.99764	"Ortholog of S. cerevisiae YCL002C"
orf19.7072	"PEL1"	CD36_70170	1.30214	-0.86133	-2.16348	"Predicted enzyme of mitochondrial phospholipid biosynthesis; upregulated in biofilm"
orf19.7071	"FGR2"	CD36_70160	0.318174	6.79222	6.47405	"Protein similar to phosphate transporters; transposon mutation affects filamentous growth; expression is regulated upon white-opaque switching"
orf19.7070	"orf19.7070"	NA	NaN	NA	NA	""
orf19.707	"APG7"	CD36_32270	0.442525	1.07668	0.63415	"S. cerevisiae ortholog ATG7 has role in mitochondrion degradation, piecemeal microautophagy of nucleus, CVT pathway, macroautophagy, C-terminal protein lipidation, protein modification by small protein conjugation"
orf19.7069	"orf19.7069"	CD36_70150	0.954776	2.22134	1.26657	"S. cerevisiae ortholog TAE1 has N-terminal protein N-methyltransferase activity, has role in N-terminal peptidyl-proline dimethylation, translation and localizes to cytosol"
orf19.7068	"MAC1"	CD36_70140	0.977857	0.748653	-0.229203	"Transcriptional regulator of the CTR1 copper transporter; activates CTR1 transcription under low-copper conditions; ectopic expression causes copper-sensitive stimulation of filamentation in S. cerevisiae"
orf19.7067	"orf19.7067"	CD36_70130	-0.883105	-2.19856	-1.31545	"S. cerevisiae ortholog CTR9 has role in histone methylation, RNA elongation from RNA polymerase II promoter, chromosome segregation, RNA elongation from RNA polymerase I promoter"
orf19.7065	"PSF3"	CD36_70120	1.06852	-0.0804541	-1.14898	"Predicted ORF in Assemblies 19, 20 and 21; cell-cycle regulated periodic mRNA expression"
orf19.7064	"GLN4"	CD36_70110	0.736775	-0.305227	-1.042	"Putative tRNA-Gln synthetase; genes encoding ribosomal subunits, translation factors, and tRNA synthetases are downregulated upon phagocytosis by murine macrophage"
orf19.7063	"orf19.7063"	CD36_70100	0.404921	-0.912695	-1.31762	"S. cerevisiae ortholog THG1 has tRNA guanylyltransferase activity, has role in tRNA modification and localizes to cytoplasm, nucleus"
orf19.7062	"RPA135"	CD36_70090	0.109978	-2.98347	-3.09345	"Predicted ORF in Assemblies 19, 20 and 21; decreased expression in response to prostaglandins"
orf19.7061	"orf19.7061"	CD36_70080	1.41992	-0.623824	-2.04375	""
orf19.7060	"orf19.7060"	CD36_70070	-1.2181	-2.48264	-1.26455	""
orf19.706	"NMD3"	CD36_32260	0.372164	-2.46542	-2.83758	"Predicted ORF in Assemblies 19, 20 and 21; downregulated in core stress response; decreased expression in response to prostaglandins"
orf19.7059	"orf19.7059"	CD36_70060	0.967677	-0.133647	-1.10132	"S. cerevisiae ortholog SWT1 has endoribonuclease activity, has role in transcription, DNA-dependent, nuclear mRNA surveillance of mRNP export and localizes to cytoplasm, nucleus"
orf19.7058	"orf19.7058"	CD36_70050	1.17652	1.77855	0.602027	"S. cerevisiae ortholog RMD8 localizes to cytoplasm"
orf19.7057	"orf19.7057"	CD36_70040	0.452827	0.850396	0.397569	"Predicted ORF in Assemblies 19, 20 and 21; protein detected by mass spec in stationary phase cultures"
orf19.7056	"orf19.7056"	CD36_70030	4.50748	3.2781	-1.22938	"Putative protein of unknown function, transcription is upregulated in clinical isolates from HIV+ patients with oral candidiasis"
orf19.7055	"orf19.7055"	NA	Inf	NA	NA	""
orf19.7054	"orf19.7054"	NA	0.148249	NA	NA	""
orf19.7053	"GAC1"	CD36_70020	-0.193744	1.21658	1.41033	"Protein described as similar to regulatory subunit of serine/threonine phosphoprotein phosphatase 1; fluconazole-induced; caspofungin repressed; transcriptionally activated by Mnl1p under weak acid stress; regulated by Nrg1p, Tup1p"
orf19.7052	"orf19.7052"	NA	0.865849	NA	NA	"Predicted ORF in Assemblies 19, 20 and 21; possibly an essential gene, disruptants not obtained by UAU1 method"
orf19.7051	"orf19.7051"	CD36_70630	1.70205	0.729248	-0.972803	"Ortholog of S. cerevisiae YOR111W"
orf19.7050	"NOP15"	CD36_70640	1.11528	-2.2143	-3.32958	"Protein described as a nucleolar ribosome biogenesis factor; hyphal-induced expression"
orf19.705	"GCN5"	CD36_32250	0.443134	0.513925	0.0707915	"Predicted ORF in Assemblies 19, 20 and 21; mutation confers hypersensitivity to 5-fluorouracil (5-FU); possibly an essential gene, disruptants not obtained by UAU1 method"
orf19.7049	"CYB5"	CD36_70650	1.23459	0.566703	-0.667887	"Cytochrome b(5); not essential for viability; similar to S. cerevisiae Cyb5p; transcriptionally regulated by iron; expression greater in high iron; fluconazole-induced; shows colony morphology-related gene regulation by Ssn6p"
orf19.7048.1	"RPS28B"	NA	0.571303	NA	NA	"Putative ribosomal protein S28B"
orf19.7047	"RTF1"	CD36_70660	0.545214	2.04063	1.49542	"Protein induced during the mating process"
orf19.7046	"MET28"	CD36_70670	0.849388	1.65942	0.810029	"Protein induced during the mating process; possibly an essential gene, disruptants not obtained by UAU1 method"
orf19.7044	"orf19.7044"	CD36_70680	-0.233137	-1.4761	-1.24296	"S. cerevisiae ortholog RIM15 has protein kinase activity and has role in age-dependent response to oxidative stress involved in chronological cell aging, protein phosphorylation, regulation of meiosis"
orf19.7043.1	"ACB1"	CD36_70690	1.36398	1.77362	0.409647	"Protein described as similar to a region of acyl-coenzyme-A-binding protein; amphotericin B repressed; regulated by Nrg1p, Tup1p"
orf19.7043	"orf19.7043"	NA	0.510819	NA	NA	"S. cerevisiae ortholog YLR050C localizes to endoplasmic reticulum"
orf19.7042	"orf19.7042"	CD36_70710	0.503914	0.988464	0.484549	"Increased transcription is observed upon benomyl treatment or in an azole-resistant strain that overexpresses MDR1; induced by nitric oxide"
orf19.7041	"orf19.7041"	CD36_70720	0.835272	-0.0455931	-0.880866	"Putative protein of unknown function; heterozygous null mutant exhibits hypersensitivity to parnafungin and cordycepin in the C. albicans fitness test"
orf19.704	"SOL3"	CD36_32240	1.30151	0.552955	-0.74856	"Predicted ORF in Assemblies 19, 20 and 21; macrophage-downregulated protein abundance; protein detected by mass spec in exponential and stationary phase cultures"
orf19.7038	"orf19.7038"	CD36_70730	0.644903	0.593308	-0.0515951	"S. cerevisiae ortholog MVP1 has phosphatidylinositol-3-phosphate binding, has role in protein targeting to vacuole and localizes to cytoplasm"
orf19.7037	"YAE1"	CD36_70740	0.43199	-3.33614	-3.76813	"S. cerevisiae ortholog YAE1 localizes to cytoplasm, nucleus"
orf19.7036	"orf19.7036"	CD36_70750	0.506392	-2.04241	-2.5488	"S. cerevisiae ortholog WHI2 has phosphatase activator activity and has role in actin filament organization, regulation of growth, response to heat, response to salt stress, endocytosis"
orf19.7035	"RFC2"	CD36_70760	0.869533	-1.83443	-2.70397	"Predicted ORF in Assemblies 19, 20 and 21; periodic mRNA expression, peak at cell-cycle G1/S phase"
orf19.7034	"orf19.7034"	CD36_70770	0.102583	-2.77117	-2.87375	""
orf19.7033	"orf19.7033"	CD36_70780	-0.0233913	-1.53658	-1.51319	"Putative dual specificity protein phosphatase, similar to S. cerevisiae Pps1p"
orf19.7032	"orf19.7032"	CD36_70790	0.0660632	1.39956	1.3335	""
orf19.7030	"SSR1"	CD36_70800	1.05402	-1.5796	-2.63362	"Beta-glucan associated cell-wall protein with role in cell wall structure; S/T rich protein, GPI anchor; similar mRNA abundance in yeast-form and germ tube; detected at germ tube plasma membrane by mass spec; similar to S. cerevisiae Ssr1p"
orf19.703	"orf19.703"	CD36_32230	0.54628	-0.519603	-1.06588	"S. cerevisiae ortholog CPD1 has 2',3'-cyclic-nucleotide 3'-phosphodiesterase activity, has role in cyclic nucleotide metabolic process and localizes to clathrin-coated vesicle"
orf19.7029	"orf19.7029"	CD36_70810	0.137183	-0.23358	-0.370763	"Predicted ORF in Assemblies 19, 20 and 21; mutation confers hypersensitivity to toxic ergosterol analog"
orf19.7027	"orf19.7027"	CD36_70820	-1.19666	-2.9055	-1.70884	""
orf19.7025	"MCM1"	CD36_70830	1.13731	1.80625	0.668935	"Transcription factor; regulator of hyphal growth; may act with Wor1p; canonical and non-canonical binding sites; MADS domain DNA-binding motif; similar to S. cerevisiae Mcm1p; greater expression in white than opaque cells; intron in 5'-UTR"
orf19.7024	"orf19.7024"	NA	-0.436714	NA	NA	""
orf19.7023	"orf19.7023"	CD36_70840	-0.191203	-1.0181	-0.826895	"Predicted ORF in Assemblies 19, 20 and 21; oxidative stress-induced via Cap1p"
orf19.7022	"orf19.7022"	CD36_70850	-0.0332984	-3.21464	-3.18135	""
orf19.7021	"GPH1"	CD36_70860	0.965845	-1.42128	-2.38713	"Putative glycogen phosphorylase; gene regulated by Ssk1p, Mig1p, and Tup1p; fluconazole-induced; localizes to cell surface of hyphal cells, but not yeast-form cells; S. cerevisiae Gph1p is a stress-regulated protein of glycogen metabolism"
orf19.7020	"orf19.7020"	CD36_70870	0.820846	-1.72008	-2.54092	"Protein similar to S. cerevisiae Kex1p, which is a pheromone-processing peptidase; possible Kex2p substrate"
orf19.702	"orf19.702"	CD36_32210	0.0520914	-2.91663	-2.96872	"S. cerevisiae ortholog ECM32 has DNA helicase activity, has role in regulation of translational termination and localizes to polysome"
orf19.7019	"YML6"	CD36_70880	1.49132	-1.57477	-3.06609	"Protein described as a mitochondrial ribosomal protein; induced upon adherence to polystyrene"
orf19.7018	"RPS18"	CD36_70890	0.503746	-1.39011	-1.89385	"Predicted ribosomal protein; genes encoding cytoplasmic ribosomal subunits, translation factors, and tRNA synthetases are downregulated upon phagocytosis by murine macrophage; repressed by nitric oxide"
orf19.7017	"YOX1"	CD36_70900	3.29121	-Inf	-Inf	"Predicted ORF in Assemblies 19, 20 and 21; periodic mRNA expression, peak at cell-cycle G1/S phase"
orf19.7016	"PHM5"	CD36_70910	0.513209	2.5189	2.00569	"S. cerevisiae ortholog PPN1 has exopolyphosphatase activity, endopolyphosphatase activity, has role in polyphosphate catabolic process and localizes to vacuolar membrane, nucleus"
orf19.7015	"RPP0"	CD36_70930	1.11033	-1.30882	-2.41916	"Putative ribosomal protein; antigenic in mouse; biofilm induced; cytoplasmic ribosomal subunit, translation factor, and tRNA synthetase genes are downregulated upon phagocytosis by murine macrophage; induced by Tbf1p; overlaps orf19.7014"
orf19.7014	"orf19.7014"	NA	NaN	NA	NA	"ORF predicted by Annotation Working Group; transcription is positively regulated by Tbf1p; overlaps orf19.7015"
orf19.7013	"orf19.7013"	CD36_70940	1.24778	2.1791	0.931312	""
orf19.7012	"orf19.7012"	CD36_70950	0.613826	2.25936	1.64554	"S. cerevisiae ortholog MRPS16 has structural constituent of ribosome and localizes to mitochondrial small ribosomal subunit"
orf19.7011	"orf19.7011"	CD36_70960	0.465335	-2.30488	-2.77021	"S. cerevisiae ortholog RRP12 localizes to 90S preribosome, nucleus"
orf19.7010	"orf19.7010"	CD36_70970	0.758611	0.0673114	-0.691299	"S. cerevisiae ortholog YIL001W localizes to cytoplasm"
orf19.701	"CFL11"	CD36_32200	1.73321	2.75244	1.01922	"Predicted ORF in Assemblies 19, 20 and 21; similar to ferric reductase Fre10p; flucytosine repressed; possibly adherence-induced; possibly an essential gene, disruptants not obtained by UAU1 method"
orf19.7009	"orf19.7009"	CD36_70980	3.65075	2.67443	-0.976316	""
orf19.7007	"orf19.7007"	CD36_70990	-1.65911	-2.20906	-0.549958	""
orf19.7006	"orf19.7006"	CD36_71000	0.327946	0.292819	-0.0351274	""
orf19.7002	"orf19.7002"	NA	0.521961	NA	NA	""
orf19.7001	"YCK2"	CD36_85620	0.7488	-1.08185	-1.83065	"Plasma membrane protein similar to S. cerevisiae casein kinase I, Yck2p; null mutant has defect in damaging oral epithelial cells and in hyphal branching; transcription is activated in weak acid stress or on contact with host cells"
orf19.700	"SEO1"	CD36_32190	0.494176	0.222555	-0.271621	"Protein with similarity to permeases; transcription is negatively regulated by Sfu1p; flucytosine induced; transcriptionally activated by Mnl1p under weak acid stress"
orf19.6999	"orf19.6999"	CD36_85610	1.70624	3.47075	1.76451	""
orf19.6998	"GTT1"	CD36_85600	0.211443	-2.07485	-2.28629	"Protein described as glutathione S-transferase; downregulated upon adherence to polystyrene; regulated upon white-opaque switching; induced in the presence of human neutrophils; oxidative stress-induced via Cap1p; regulated by Gcn2p, Gcn4p"
orf19.6997	"orf19.6997"	CD36_85590	-0.479782	1.62137	2.10116	""
orf19.6996	"orf19.6996"	CD36_85580	-0.14088	-4.49475	-4.35387	""
orf19.6995	"orf19.6995"	CD36_85570	-0.751224	-3.72105	-2.96982	""
orf19.6994	"BAT22"	CD36_85560	0.511705	-0.236186	-0.747891	"Protein described as a branched chain amino acid aminotransferase; regulated by Gcn4p; induced in response to amino acid starvation (3-aminotriazole treatment), farnesol treatment"
orf19.6993	"GAP2"	CD36_85550	0.288988	-1.67042	-1.95941	"Protein similar to amino acid permeases; ketoconazole, flucytosine repressed; induced by histidine, and induction requires Ssy1p; regulated by Nrg1p, Tup1p; shows colony morphology-related gene regulation by Ssn6p"
orf19.6992	"orf19.6992"	CD36_85540	-0.632545	0.880729	1.51327	"Predicted membrane transporter, member of the drug:proton antiporter (12 spanner) (DHA1) family, major facilitator superfamily (MFS)"
orf19.6991	"PRE3"	CD36_85530	1.28184	1.93309	0.651244	"Protein described as beta-1 subunit of proteasome; macrophage-induced protein; regulated by Gcn2p and Gcn4p"
orf19.6990	"orf19.6990"	CD36_85520	-0.237175	-2.91088	-2.67371	"Putative peptidyl-prolyl cis-trans isomerase; predicted endoplasmic reticulum (ER) localization"
orf19.699	"orf19.699"	CD36_32180	-1.21033	-2.76332	-1.55299	""
orf19.6989	"orf19.6989"	CD36_85510	0.733211	-0.532017	-1.26523	""
orf19.6988	"OST1"	CD36_85500	1.70203	1.3885	-0.313527	"Putative oligosaccharyltransferase"
orf19.6987	"DNM1"	CD36_85490	0.663124	-0.0588382	-0.721962	"Putative protein of unknown function; transcription is upregulated in an RHE model of oral candidiasis; transcription is regulated by Nrg1p, Mig1p, and Tup1p"
orf19.6986	"orf19.6986"	CD36_85480	0.079862	-1.24739	-1.32725	""
orf19.6985	"TEA1"	CD36_85470	-0.00225057	-2.04972	-2.04747	"Putative transcription factor with zinc cluster DNA-binding motif; has similarity to S. cerevisiae Tea1p"
orf19.6984	"orf19.6984"	CD36_85460	0.399661	2.00261	1.60295	""
orf19.6983	"orf19.6983"	CD36_85440	0.928905	-0.718484	-1.64739	"Predicted ORF in Assemblies 19, 20 and 21; repressed by nitric oxide"
orf19.6982	"orf19.6982"	CD36_85430	0.157957	-2.16002	-2.31798	"S. cerevisiae ortholog AIM23 localizes to mitochondrion"
orf19.6981	"orf19.6981"	CD36_85420	-0.898545	-1.58352	-0.684973	"Ortholog of S. cerevisiae YKR051W"
orf19.6980	"orf19.6980"	CD36_85410	-0.0105946	-1.34135	-1.33076	"Ortholog of S. cerevisiae YDL025C"
orf19.698	"orf19.698"	CD36_32170	-1.11658	-2.96215	-1.84557	"S. cerevisiae ortholog ICE2 has role in endoplasmic reticulum inheritance and localizes to integral to endoplasmic reticulum membrane"
orf19.6979	"orf19.6979"	CD36_85390	-0.460999	-0.736414	-0.275415	"S. cerevisiae ortholog MAM3 has role in mitochondrion organization, cellular manganese ion homeostasis and localizes to fungal-type vacuole membrane"
orf19.6978	"orf19.6978"	NA	-1.55219	NA	NA	""
orf19.6977	"GPI1"	CD36_85370	0.312225	-4.24593	-4.55815	"Putative protein of GPI synthesis; expression is reduced in a fluconazole-resistant isolate"
orf19.6976	"orf19.6976"	CD36_85360	1.01999	-0.146286	-1.16628	"Predicted membrane transporter; member of the proton coupled folate transporter/heme carrier protein (PCFT/HCP) family, major facilitator superfamily (MFS); virulence-group-correlated expression"
orf19.6975	"YST1"	CD36_85350	0.116091	-2.41208	-2.52817	"Ribosome-associated protein; antigenic in mouse; complements S. cerevisiae yst1 yst2 mutant; similar to laminin-binding proteins, but does not bind laminin; possible S/T phosphorylation, N-glycosylation, myristoylation, Gcn4p-regulated"
orf19.6973	"orf19.6973"	CD36_85340	-0.349843	-1.62187	-1.27202	"Predicted ORF in Assemblies 19, 20 and 21; regulated by Gcn2p and Gcn4p"
orf19.6972	"SMI1B"	CD36_85330	1.29646	-2.5595	-3.85596	"Protein of unknown function; transcription is negatively regulated by Rim101p; possibly an essential gene, disruptants not obtained by UAU1 method"
orf19.6971	"DIE2"	CD36_85320	2.18067	-0.204679	-2.38535	"S. cerevisiae ortholog DIE2 has dolichyl-phosphate-glucose-glycolipid alpha-glucosyltransferase activity, has role in protein N-linked glycosylation and localizes to endoplasmic reticulum membrane"
orf19.6970	"orf19.6970"	CD36_85310	1.25605	0.535432	-0.72062	"Protein not essential for viability"
orf19.697	"orf19.697"	CD36_32160	0.230457	-0.669559	-0.900016	"S. cerevisiae ortholog YSC83 localizes to mitochondrial outer membrane"
orf19.6968	"orf19.6968"	CD36_85300	0.721467	-3.26963	-3.9911	"Predicted ORF in Assemblies 19, 20 and 21; Hog1p-downregulated"
orf19.6967	"USO6"	CD36_85290	0.161268	2.23136	2.07009	"Transcription is induced upon filamentous growth"
orf19.6966	"orf19.6966"	CD36_85280	1.07843	-0.218759	-1.29719	"S. cerevisiae ortholog CKI1 has choline kinase activity, ethanolamine kinase activity, has role in phosphatidylcholine biosynthetic process, phosphatidylethanolamine biosynthetic process and localizes to cytoplasm"
orf19.696	"STE2"	CD36_32150	Inf	Inf	1.18056	"Receptor for alpha factor mating pheromone, MFalpha; required for a-type cells to respond to alpha factor, for opaque a-form mating and white a-form response; possible Kex2p substrate; a-specific, alpha-factor induced, A1-Alpha2p repressed"
orf19.6958	"ECM18"	CD36_83620	2.30025	0.479123	-1.82113	"S. cerevisiae ortholog ECM18 has role in fungal-type cell wall organization and localizes to mitochondrion"
orf19.6957	"orf19.6957"	NA	1.14825	NA	NA	""
orf19.6956	"DAL9"	CD36_83640	1.64058	0.321883	-1.3187	"Putative allantoate permease; fungal-specific (no human or murine homolog)"
orf19.6955	"HBR3"	CD36_83650	0.163442	-3.312	-3.47544	"Essential, uncharacterized protein; regulated by hemoglobin; S. cerevisiae ortholog is essential"
orf19.6953	"IRS4"	CD36_83660	-0.280828	-1.67694	-1.39611	"Protein with roles in cell wall integrity, systemic (but not oral) murine infection, adherence, hyphal growth, and agar-embedded filamentous growth; antigenic in human infection; similar to S. cerevisiae Irs4p"
orf19.6952	"orf19.6952"	CD36_83670	0.143688	-2.59642	-2.7401	"S. cerevisiae ortholog HDA2 has role in gene silencing by RNA, gene silencing involved in chronological cell aging, histone deacetylation, negative regulation of transcription from RNA polymerase II promoter"
orf19.6951	"orf19.6951"	CD36_83680	0.420975	-0.0222395	-0.443214	"S. cerevisiae ortholog DPL1 has sphinganine-1-phosphate aldolase activity, has role in sphingolipid metabolic process, calcium-mediated signaling, cellular response to starvation and localizes to endoplasmic reticulum"
orf19.6950	"orf19.6950"	CD36_83690	1.14654	2.32351	1.17697	"S. cerevisiae ortholog YDR352W localizes to fungal-type vacuole membrane"
orf19.695	"RGS2"	CD36_32130	-0.923011	-4.53285	-3.60983	"Protein of RGS superfamily; not essential for viability"
orf19.6949	"orf19.6949"	NA	-2.21432	NA	NA	""
orf19.6948	"CCC1"	CD36_83700	-0.168788	-1.48619	-1.3174	"Putative manganese transporter, required for normal filamentous growth; mRNA binds to She3p and is localized to hyphal tips; repressed by nitric oxide and alkaline pH; shows colony morphology-related regulation by Ssn6p"
orf19.6947	"GTT11"	CD36_83710	0.281721	-0.592489	-0.874209	"Glutathione S-transferase, localized to ER; induced in exponentially growing cells, under oxidative stress; induced by nitric oxide"
orf19.6944	"PHB1"	CD36_83720	0.450204	-0.776355	-1.22656	"Putative prohibitin; identified in detergent-resistant membrane fraction (possible lipid raft component); predicted N-terminal acetylation"
orf19.6943	"orf19.6943"	NA	0.0595543	NA	NA	"Predicted ORF from Assembly 19; removed from Assembly 20; subsequently reinstated in Assembly 21 based on comparative genome analysis"
orf19.6942	"ORC3"	CD36_83740	-0.105508	-1.91806	-1.81256	"Protein similar to S. cerevisiae Orc3p, which is a component of the origin recognition complex involved in DNA replication; mutation confers hypersensitivity to toxic ergosterol analog; induced under hydroxyurea treatment"
orf19.6941	"orf19.6941"	CD36_83750	0.430778	0.664745	0.233966	""
orf19.6940	"orf19.6940"	CD36_83760	1.65792	4.00416	2.34624	""
orf19.6938	"MEU1"	CD36_83770	1.29727	-2.26637	-3.56365	"Predicted ORF in Assemblies 19, 20 and 21; protein level decreased in stationary phase cultures"
orf19.6937	"PTR2"	CD36_83780	-0.987896	-5.26187	-4.27397	"Putative oligopeptide transporter; regulated by Stp2p and Stp3p; transcriptionally induced upon phagocytosis by macrophage; downregulated by Rim101p at pH 8"
orf19.6936	"RAD53"	CD36_83790	0.917023	-2.88528	-3.80231	"Protein involved in regulation of DNA-damage-induced filamentous growth; putative component of cell cycle checkpoint; ortholog of S. cerevisiae Rad53p, protein kinase required for cell-cycle arrest in response to DNA damage"
orf19.6934	"orf19.6934"	CD36_83800	1.08887	-0.139833	-1.2287	""
orf19.6933	"orf19.6933"	CD36_83810	0.509043	-0.738437	-1.24748	"S. cerevisiae ortholog RRD2 has protein phosphatase type 2A regulator activity, peptidyl-prolyl cis-trans isomerase activity and has role in mitotic spindle organization in nucleus, response to osmotic stress"
orf19.6931	"orf19.6931"	CD36_83820	0.724598	0.484123	-0.240475	"Putative protein of unknown function; heterozygous null mutant exhibits hypersensitivity to parnafungin and cordycepin in the C. albicans fitness test"
orf19.6930	"SOL1"	CD36_83830	1.573	-0.669149	-2.24215	"Cell cycle regulator; partial functional homolog of S. cerevisiae Sic1p; protein degradation regulated by SCF(CDC4) pathway; CDK phosphorylation predicted"
orf19.693	"orf19.693"	CD36_32120	2.47018	2.02077	-0.449406	""
orf19.6929	"orf19.6929"	CD36_83840	1.60465	1.93155	0.326891	"S. cerevisiae ortholog YER134C localizes to cytoplasm, nucleus"
orf19.6928	"SAP9"	CD36_83850	-1.24096	-1.6357	-0.394736	"Secreted aspartyl proteinase; roles in adhesion, cell surface integrity; induced by antifungal drugs, stationary phase, or in white-phase cells; farnesol-downregulated in biofilm; autocatalytic processing; GPI-anchor; N-glycosylated"
orf19.6927	"PEP8"	CD36_83860	0.911716	-0.317096	-1.22881	"Protein similar to S. cerevisiae Pep8p, which is involved in retrograde transport; transposon mutation affects filamentous growth"
orf19.6926	"CSC25"	CD36_83870	0.0803564	-0.279589	-0.359945	"Guanyl-nucleotide exchange factor; activator of Ras/adenylyl cyclase pathway; functional homolog of S. cerevisiae Cdc25p; transposon mutation affects filamentous growth"
orf19.6925	"HTB1"	CD36_83880	2.15728	2.78824	0.630954	"Putative histone H2B; induced upon adherence to polystyrene; amphotericin B or caspofungin repressed; flucytosine or fluconazole induced; regulated by Efg1p; slow growth, increased white-to opaque switching in ectopic expression strains"
orf19.6924	"HTA1"	CD36_83890	1.83217	1.52698	-0.305196	"Putative histone H2A; reduced mRNA abundance detected in homozygous fkh2 null mutant; amphotericin B repressed; farnesol regulated; RNA abundance regulated by tyrosol and cell density"
orf19.6923.1	"orf19.6923.1"	NA	-0.0327877	NA	NA	""
orf19.6923	"orf19.6923"	CD36_83920	0.204174	-1.6211	-1.82527	""
orf19.6922	"orf19.6922"	NA	NaN	NA	NA	""
orf19.6921	"orf19.6921"	CD36_71230	-0.0761894	-0.703757	-0.627568	""
orf19.6920	"orf19.6920"	CD36_71220	2.63788	4.81806	2.18018	"Predicted ORF in Assemblies 19, 20 and 21; induced upon biofilm formation"
orf19.692	"orf19.692"	CD36_62150	0.209278	-0.509074	-0.718353	""
orf19.6919	"orf19.6919"	CD36_71210	1.73321	1.09331	-0.639898	""
orf19.6918	"orf19.6918"	CD36_71200	0.473862	-3.16026	-3.63413	""
orf19.6917	"orf19.6917"	CD36_71190	0.982911	-1.0108	-1.99371	"S. cerevisiae ortholog ZIM17 has role in protein import into mitochondrial matrix, protein folding, protein stabilization, response to unfolded protein and localizes to mitochondrial matrix"
orf19.6916	"orf19.6916"	CD36_71180	1.42908	-2.61261	-4.04168	"S. cerevisiae ortholog ATP11 has unfolded protein binding, has role in mitochondrial proton-transporting ATP synthase complex assembly and localizes to mitochondrion"
orf19.6915	"MRE11"	CD36_71170	-0.290434	0.596015	0.886449	"Protein described as DNA double-strand break repair factor; involved in response to oxidative stress and drug resistance"
orf19.6913	"GCN2"	CD36_71160	-0.0650324	-1.89938	-1.83435	"Translation initiation factor 2-alpha (eIF2alpha) kinase; has nonessential role in amino acid starvation response, in contrast to S. cerevisiae homolog; similar to S. cerevisiae Gcn2p"
orf19.6912	"orf19.6912"	CD36_71150	0.711707	1.36934	0.657632	"Putative ethanolamine kinase"
orf19.6911	"orf19.6911"	NA	NaN	NA	NA	""
orf19.6910	"PSF1"	CD36_71140	1.61292	1.63392	0.0210011	"S. cerevisiae ortholog PSF1 has role in DNA-dependent DNA replication, double-strand break repair via break-induced replication"
orf19.691	"GPD2"	CD36_62130	-1.76567	-3.37366	-1.60799	"Similar to glycerol 3-P dehydrogenases; regulated by Ssn6p, Nrg1p, Efg1p; induced upon osmotic and oxidative stress (via Hog1p), cell wall regeneration, macrophage/pseudohyphal growth, core stress response; possibly essential (UAU1 method)"
orf19.6909	"orf19.6909"	CD36_71130	0.00681053	-2.78591	-2.79272	""
orf19.6908	"orf19.6908"	CD36_71120	1.637	-1.26631	-2.90331	"Putative dihydrofolate synthetase involved in folic acid biosynthesis"
orf19.6907	"orf19.6907"	CD36_71110	0.957455	-5.78858	-6.74604	"S. cerevisiae ortholog YDL156W localizes to cytoplasm, nucleus"
orf19.6906	"ASC1"	CD36_71100	0.871854	-2.35834	-3.2302	"40S ribosomal subunit protein, similar to G-beta subunits; required for filamentous growth under glucose or nitrogen starvation; required for full virulence in mouse intravenous model; snoRNA snR24 is encoded within the ASC1 intron"
orf19.6905	"orf19.6905"	CD36_71090	1.98608	1.63899	-0.347082	"Ortholog of S. cerevisiae YNL011C"
orf19.6904	"GCN3"	CD36_71080	1.47751	-0.262048	-1.73956	"Protein described as a translation initiator; downregulated in the presence of human whole blood or polymorphonuclear (PMN) cells"
orf19.6903	"orf19.6903"	CD36_71070	1.42485	1.01834	-0.406515	"S. cerevisiae ortholog RPC37 has DNA-directed RNA polymerase activity, has role in tRNA transcription from RNA polymerase III promoter and localizes to DNA-directed RNA polymerase III complex"
orf19.6902	"DBP7"	CD36_71060	0.060435	-1.72789	-1.78832	"Predicted ORF in Assemblies 19, 20 and 21; transcription is upregulated in both intermediate and mature biofilms"
orf19.6901	"orf19.6901"	CD36_71050	1.74002	1.01126	-0.728761	"S. cerevisiae ortholog DCS1 has m7G(5')pppN diphosphatase activity and has role in deadenylation-dependent decapping of nuclear-transcribed mRNA, nuclear-transcribed mRNA catabolic process, deadenylation-independent decay"
orf19.6900	"orf19.6900"	CD36_71040	-0.0483792	-3.53056	-3.48218	"S. cerevisiae ortholog MDM12 has role in phospholipid transport, protein import into mitochondrial outer membrane and localizes to ERMES complex"
orf19.690	"PLB2"	CD36_62120	0.336182	-0.0463609	-0.382543	"Putative phospholipase B; conserved catalytic region; 6 putative N-glycosylation motifs; predicted secretion signal; no GPI anchor predicted; fungal-specific (no human or murine homolog)"
orf19.69.2	"orf19.69.2"	NA	-2.02168	NA	NA	""
orf19.69	"orf19.69"	CD36_11660	-1.56545	-4.25038	-2.68493	"Predicted ORF in Assemblies 19, 20 and 21; transcriptionally activated by Mnl1p under weak acid stress"
orf19.6899	"orf19.6899"	CD36_71030	-1.38586	-2.51503	-1.12917	"Predicted ORF in Assemblies 19, 20 and 21; mutation confers hypersensitivity to toxic ergosterol analog"
orf19.6898.1	"orf19.6898.1"	CD36_71020	0.953172	-0.21402	-1.16719	""
orf19.6898	"orf19.6898"	CD36_71010	0.730396	1.00567	0.275269	"Predicted ORF in Assemblies 19, 20 and 21; increased transcription is observed upon benomyl treatment or in an azole-resistant strain that overexpresses MDR1"
orf19.6897	"orf19.6897"	NA	NaN	NA	NA	""
orf19.6896	"orf19.6896"	NA	1.47018	NA	NA	"Predicted ORF in Assemblies 19, 20 and 21; member of a family encoded by FGR6-related genes in the RB2 repeat sequence"
orf19.6893	"orf19.6893"	CD36_20240	0.656902	-1.10171	-1.75861	"S. cerevisiae ortholog RUD3 has role in ER to Golgi vesicle-mediated transport"
orf19.6891	"RFC1"	CD36_20230	0.328387	-1.87995	-2.20834	"Protein likely to be essential for growth, based on an insertional mutagenesis strategy; similar to S. cerevisiae Rfc1, which is a subunit of DNA replication factor C"
orf19.689	"PLB1"	CD36_62110	1.42836	-0.302846	-1.7312	"Phospholipase B; required for wild-type host cell penetration and for wild-type virulence in mouse model of systemic infection; Hog1p-induced; predicted signal sequence, N-glycosylation, and possible Y phosphorylation site, not GPI anchored"
orf19.6889	"MKK2"	CD36_20220	0.851427	1.34464	0.493218	"Protein not essential for viability; similar to S. cerevisiae Mkk2p, which is a MAP kinase kinase involved in signal transduction; macrophage-downregulated gene; mutant is hypersensitive to caspofungin"
orf19.6888	"orf19.6888"	CD36_20210	0.459036	-1.57011	-2.02914	"Protein with Gal4p-like DNA-binding domain; gene transcription regulated by Mig1p and Tup1p"
orf19.6887	"orf19.6887"	NA	0.323456	NA	NA	"Predicted ORF from Assembly 19; repressed by nitric oxide; removed from Assembly 20; subsequently reinstated in Assembly 21 based on comparative genome analysis"
orf19.6886	"orf19.6886"	CD36_20190	0.399934	-1.6288	-2.02873	"S. cerevisiae ortholog NOP53 has rRNA binding, has role in maturation of LSU-rRNA from tricistronic rRNA transcript (SSU-rRNA, 5.8S rRNA, LSU-rRNA), ribosomal large subunit export from nucleus and localizes to nucleolus"
orf19.6885	"SPO7"	CD36_20180	1.19517	0.288889	-0.906281	"Protein similar to S. cerevisiae Spo7p; transcription is induced in response to alpha pheromone in SpiderM medium"
orf19.6884	"orf19.6884"	CD36_20170	1.36986	1.20367	-0.16618	"S. cerevisiae ortholog GWT1 has glucosaminyl-phosphotidylinositol O-acyltransferase activity, has role in GPI anchor biosynthetic process and localizes to nuclear membrane-endoplasmic reticulum network"
orf19.6883	"orf19.6883"	CD36_20160	1.02711	0.927392	-0.0997209	"S. cerevisiae ortholog KES1 has role in maintenance of cell polarity, post-Golgi vesicle-mediated transport, sterol transport, exocytosis, endocytosis"
orf19.6882.1	"orf19.6882.1"	CD36_20150	1.20275	0.949405	-0.253342	"S. cerevisiae ortholog RPL33A has structural constituent of ribosome, has role in translation and localizes to cytosolic large ribosomal subunit"
orf19.6882	"OSM1"	CD36_20140	-1.51665	-2.33576	-0.819116	"Putative flavoprotein subunit of fumarate reductase; soluble protein in hyphae; fungal-specific (no human or murine homolog); caspofungin repressed; protein detected by mass spec in stationary phase cultures"
orf19.6881	"YTH1"	CD36_20130	-0.5395	-0.235174	0.304326	"Protein described as an mRNA cleavage and polyadenylation specificity factor; transcription is regulated upon yeast-hyphal switch; decreased expression in hyphae compared to yeast-form cells; fluconazole or flucytosine induced"
orf19.6880	"orf19.6880"	CD36_20120	0.234192	-0.727055	-0.961246	"S. cerevisiae ortholog COG4 has role in retrograde transport, vesicle recycling within Golgi and localizes to Golgi transport complex"
orf19.688	"orf19.688"	CD36_62100	0.862882	-1.9737	-2.83658	"S. cerevisiae ortholog MRPS18 has structural constituent of ribosome and localizes to mitochondrial small ribosomal subunit"
orf19.6879	"orf19.6879"	CD36_20110	1.76798	0.0876526	-1.68032	""
orf19.6877	"PNG2"	CD36_20100	-0.307569	-1.70199	-1.39443	"Putative peptide:N-glycanase; gene contains highly variable numbers of 12-bp repeats; transcription is upregulated under treatment with caspofungin, ciclopirox olamine, ketoconazole or hypoxia; gene of core caspofungin response"
orf19.6875	"VPS35"	CD36_20090	0.0378013	-2.57208	-2.60988	"Putative role in vacuolar sorting; downregulated in biofilm; induced upon adherence to polystyrene"
orf19.6874	"orf19.6874"	CD36_20080	-0.143214	-2.15732	-2.01411	"Putative helix-loop-helix (HLH) transcription factor with a role in filamentous growth"
orf19.6873.1	"orf19.6873.1"	CD36_20070	-0.469503	-3.55619	-3.08668	"S. cerevisiae ortholog KTI11 has electron carrier activity, zinc ion binding, iron ion binding and has role in tRNA wobble uridine modification, peptidyl-diphthamide biosynthetic process from peptidyl-histidine"
orf19.6873	"RPS8A"	CD36_20060	0.953628	-1.38612	-2.33975	"Putative ribosomal protein; similar to S. cerevisiae Rps8Bp; gene is induced by ciclopirox olamine treatment; genes encoding cytoplasmic ribosomal subunits are downregulated upon phagocytosis by murine macrophage; intron in 5'-UTR"
orf19.6872	"orf19.6872"	CD36_20050	1.86079	1.61983	-0.240962	"S. cerevisiae ortholog YLR126C localizes to cytoplasm"
orf19.6871	"orf19.6871"	CD36_20040	0.793483	2.23802	1.44454	""
orf19.687.1	"RPL25"	CD36_62095	1.24481	-2.13016	-3.37497	"ORF Predicted by Annotation Working Group; shows colony morphology-related gene regulation by Ssn6p"
orf19.687	"orf19.687"	CD36_62090	1.90628	-1.0465	-2.95278	""
orf19.6869	"orf19.6869"	CD36_20030	0.266651	-2.77507	-3.04172	"S. cerevisiae ortholog AST2 localizes to cytoplasm"
orf19.6868	"orf19.6868"	CD36_20020	1.20423	1.02581	-0.178421	"Putative protein of unknown function; homozygous transposon insertion causes decreased colony wrinkling under filamentous growth-inducing conditions, but does not block true hyphal formation in liquid media"
orf19.6867	"orf19.6867"	CD36_20010	0.528508	1.85909	1.33058	"Predicted ORF in Assemblies 19, 20 and 21; transcription is repressed in response to alpha pheromone in SpiderM medium"
orf19.6866	"orf19.6866"	CD36_20000	0.684967	0.898073	0.213106	"Putative U1-70K component of the U1 snRNP, involved in splicing; ortholog of S. cerevisiae SNP1; downregulated upon adherence to polystyrene"
orf19.6864	"orf19.6864"	CD36_44910	Inf	Inf	0.319412	""
orf19.6863	"VPH1"	CD36_44900	0.482426	-0.66481	-1.14724	"Vacuolar H(+)-ATPase; transcription regulated by Nrg1p, Mig1p, and Tup1p"
orf19.6862	"orf19.6862"	CD36_44890	0.100586	-1.20312	-1.3037	"Predicted ORF in Assemblies 19, 20 and 21; mutation confers hypersensitivity to 5-fluorocytosine (5-FC), 5-fluorouracil (5-FU), and tubercidin (7-deazaadenosine)"
orf19.6861	"orf19.6861"	CD36_44880	-0.698067	-4.17281	-3.47474	""
orf19.6860	"orf19.6860"	CD36_44870	0.526761	1.22837	0.701607	"S. cerevisiae ortholog PIS1 has CDP-diacylglycerol-inositol 3-phosphatidyltransferase activity and has role in phosphatidylinositol biosynthetic process"
orf19.686	"orf19.686"	CD36_62070	0.495848	-1.88288	-2.37873	"Predicted ORF in Assemblies 19, 20 and 21; regulated by Nrg1p"
orf19.6859	"orf19.6859"	CD36_44860	Inf	Inf	4.26315	""
orf19.6858	"orf19.6858"	CD36_44850	1.07276	-0.108943	-1.18171	"S. cerevisiae ortholog EDC3 has role in deadenylation-independent decapping of nuclear-transcribed mRNA, cytoplasmic mRNA processing body assembly and localizes to cytoplasmic mRNA processing body"
orf19.6855	"orf19.6855"	CD36_04370	0.144077	-1.7138	-1.85788	""
orf19.6854	"ATP1"	CD36_04360	1.01883	-1.22651	-2.24535	"ATP synthase alpha subunit; antigenic in human/mouse; at hyphal surface, not yeast; soluble in hyphae; induced by ciclopirox olamine, ketoconazole or flucytosine; downregulated by Efg1p, caspofungin; possibly essential"
orf19.6853	"orf19.6853"	CD36_04350	1.62469	-0.153028	-1.77771	""
orf19.6852.1	"orf19.6852.1"	NA	2.01525	NA	NA	""
orf19.6852	"orf19.6852"	CD36_04330	0.404052	-0.568648	-0.9727	"Ortholog of S. cerevisiae RMD6"
orf19.6851	"CHL4"	CD36_04310	0.048182	0.58012	0.531938	"Protein described as having role in chromosome segregation; RNA abundance regulated by tyrosol and cell density"
orf19.6850	"orf19.6850"	CD36_04300	1.10166	1.53425	0.432595	"Putative transcription factor with C3HC4 zinc finger DNA-binding motif; not essential for viability"
orf19.685.1	"orf19.685.1"	NA	2.70185	NA	NA	""
orf19.685	"YHM1"	CD36_62060	1.04649	-0.381208	-1.4277	"Putative mitochondrial carrier protein; fungal-specific (no human or murine homolog)"
orf19.6849	"ELC1"	CD36_04290	0.764602	2.28334	1.51873	"Transcription is regulated by Nrg1p and Mig1p; regulated by Gcn2p and Gcn4p"
orf19.6848	"VPS16"	CD36_04280	0.328821	-0.906405	-1.23523	"Protein similar to S. cerevisiae Vps16p, which is involved in protein-vacuolar targeting; likely to be essential for growth, based on insertional mutagenesis; downregulated in biofilm or in azole-resistant strain that overexpresses MDR1"
orf19.6847	"orf19.6847"	CD36_04270	0.0920455	-2.34235	-2.43439	"Predicted ORF in Assemblies 19, 20 and 21; virulence-group-correlated expression"
orf19.6846	"PHO85"	CD36_04260	0.840263	0.0237043	-0.816559	"Functional homolog of S. cerevisiae Pho85p, which is a cyclin-dependent kinase that regulates processes including transcription of PHO genes involved in phosphate metabolism; gene has intron"
orf19.6845	"orf19.6845"	CD36_04250	0.364758	-2.97913	-3.34389	"Putative transcription factor with bZIP DNA-binding motif"
orf19.6844	"ICL1"	CD36_04240	-3.28969	-3.60869	-0.318997	"Isocitrate lyase; enzyme of glyoxylate cycle; required for wild-type virulence in murine systemic infection; no mammalian homolog; gene induced upon phagocytosis by macrophage; farnesol regulated; Pex5p-dependent peroxisomal localization"
orf19.6843	"orf19.6843"	CD36_04230	0.506517	1.06226	0.555743	""
orf19.6842	"TUS1"	CD36_04220	-0.441619	-2.52697	-2.08535	"Predicted ORF in Assemblies 19, 20 and 21; transcriptionally activated by Mnl1p under weak acid stress"
orf19.6840	"orf19.6840"	CD36_04210	-0.447055	-0.81742	-0.370364	"Predicted ORF in Assemblies 19, 20 and 21; transcription is induced in response to alpha pheromone in SpiderM medium; transcription detected in high-resolution tiling array experiments"
orf19.684	"orf19.684"	CD36_62050	0.351196	-1.73069	-2.08188	"Putative transcription factor with zinc finger DNA-binding motif; heterozygous null mutant exhibits hypersensitivity to parnafungin and cordycepin in the C. albicans fitness test"
orf19.6838	"orf19.6838"	CD36_04200	0.910947	-2.89015	-3.8011	"Putative protein of unknown function, transcription is upregulated in clinical isolates from HIV+ patients with oral candidiasis"
orf19.6837	"FMA1"	CD36_04180	1.2743	0.764054	-0.510249	""
orf19.6837	"FMA1"	CD36_04190	1.2743	-0.348515	-1.62282	""
orf19.6834.10	"TAR1"	NA	-1.41244	NA	NA	"Ortholog of S. cerevisiae Tar1p, encoded within the 25S rRNA gene on the opposite strand; transcription is positively regulated by Tbf1p"
orf19.6833.2	"orf19.6833.2"	NA	Inf	NA	NA	""
orf19.6832	"orf19.6832"	CD36_86680	0.23344	-1.77371	-2.00715	""
orf19.6831	"PRP5"	CD36_86690	0.185113	-1.54938	-1.73449	"Protein described as a pre-mRNA processing RNA-helicase; induced upon adherence to polystyrene"
orf19.6830	"orf19.6830"	CD36_86700	1.05095	-0.411895	-1.46285	"Putative enoyl-CoA hydratase"
orf19.6829	"orf19.6829"	CD36_86710	0.291403	-0.325079	-0.616482	"Predicted ORF in Assemblies 19, 20 and 21; possibly an essential gene, disruptants not obtained by UAU1 method"
orf19.6828.1	"orf19.6828.1"	CD36_86720	0.363689	2.07436	1.71067	"S. cerevisiae ortholog SSS1 has role in SRP-dependent cotranslational protein targeting to membrane, translocation, posttranslational protein targeting to membrane, translocation"
orf19.6828	"orf19.6828"	CD36_86730	0.322155	-2.90352	-3.22568	"S. cerevisiae ortholog RRP1 has role in rRNA processing and localizes to nucleolus, preribosome, large subunit precursor"
orf19.6827	"SLU7"	CD36_86740	-0.0505686	-2.78079	-2.73022	"Protein similar to S. cerevisiae Slu7p; transcription is induced in response to alpha pheromone in SpiderM medium"
orf19.6826	"SLF1"	CD36_86750	0.0480086	-1.51445	-1.56246	"Predicted ORF in Assemblies 19, 20 and 21; macrophage-induced gene"
orf19.6824	"orf19.6824"	CD36_86760	1.90314	-0.701185	-2.60432	"Predicted ORF in Assemblies 19, 20 and 21; appears to be C. albicans-specific; induced upon biofilm formation; transcription is repressed in response to alpha pheromone in SpiderM medium"
orf19.6822	"orf19.6822"	CD36_86770	0.971371	0.64505	-0.326321	"S. cerevisiae ortholog DCN1 has NEDD8 ligase activity, ubiquitin binding and has role in protein neddylation, positive regulation of ubiquitin-protein ligase activity"
orf19.6821	"orf19.6821"	CD36_86780	0.441445	-0.395969	-0.837414	"S. cerevisiae ortholog APC2 has role in anaphase-promoting complex-dependent proteasomal ubiquitin-dependent protein catabolic process, protein ubiquitination and localizes to anaphase-promoting complex"
orf19.6820	"orf19.6820"	CD36_86790	0.228107	-1.58381	-1.81192	""
orf19.6818	"orf19.6818"	CD36_86800	0.449277	-1.59475	-2.04402	"S. cerevisiae ortholog YLR419W localizes to mitochondrion"
orf19.6817	"FCR1"	CD36_86810	-0.92488	-3.1539	-2.22902	"Putative zinc cluster transcription factor; negative regulator of fluconazole, ketoconazole, brefeldin A resistance; transposon mutation affects filamentous growth; partially suppresses S. cerevisiae pdr1 pdr3 mutant fluconazole sensitivity"
orf19.6816	"orf19.6816"	CD36_86820	-0.503209	0.201946	0.705155	"S. cerevisiae ortholog YJR096W has aldehyde reductase activity, has role in arabinose catabolic process, D-xylose catabolic process, cellular response to oxidative stress and localizes to cytoplasm, nucleus"
orf19.6814	"TDH3"	CD36_86830	-0.471304	-1.4001	-0.9288	"Glyceraldehyde-3-phosphate dehydrogenase; enzyme of glycolysis; NAD-linked; binds fibronectin and laminin; at surface of yeast-form cells and hyphae; soluble in hyphae; antigenic during infection; farnesol-downregulated"
orf19.6813	"orf19.6813"	CD36_86840	2.88522	1.24147	-1.64374	""
orf19.6812	"PMT2"	CD36_86850	0.540566	-0.851142	-1.39171	"Protein mannosyltransferase (PMT) with roles in hyphal growth and drug sensitivity; member of the PMT family which includes Pmt1p, Pmt2p, Pmt4p, Pmt5p, and Pmt6p; induced during cell wall regeneration; essential"
orf19.6811	"orf19.6811"	CD36_86860	0.472688	-1.51245	-1.98514	"S. cerevisiae ortholog ISA2 has role in protein maturation, iron-sulfur cluster assembly, biotin biosynthetic process and localizes to mitochondrial intermembrane space"
orf19.6810	"orf19.6810"	CD36_86870	1.6004	1.09022	-0.510184	"S. cerevisiae ortholog TPD3 has protein serine/threonine phosphatase activity and has role in mitotic cell cycle spindle assembly checkpoint, regulation of translation"
orf19.681	"HAP43"	CD36_10520	1.04852	-0.133784	-1.1823	"CCAAT-binding factor (CBF)-dependent transcription factor required for iron-limitation response; similar to transcription factor AP-1; transcription is negatively regulated by Sfu1p; ciclopirox olamine induced"
orf19.6809	"orf19.6809"	CD36_86880	0.908188	-1.18459	-2.09278	"S. cerevisiae ortholog PMU1 localizes to cytoplasm, nucleus"
orf19.6807	"orf19.6807"	NA	0.306044	NA	NA	"Predicted ORF in retrotransposon Tca17 with similarity to parts of the Gag-Pol region of retrotransposons; clade-associated gene expression"
orf19.6805	"orf19.6805"	CD36_86890	0.109493	-0.6769	-0.786393	""
orf19.6804	"orf19.6804"	CD36_86900	0.875564	0.623749	-0.251816	"S. cerevisiae ortholog SRP68 has signal sequence binding, has role in protein targeting to ER and localizes to signal recognition particle, endoplasmic reticulum targeting"
orf19.6803	"HUT1"	CD36_86910	0.669646	-1.61406	-2.2837	"S. cerevisiae ortholog HUT1 has role in UDP-galactose transport, UDP-glucose transport"
orf19.6802	"orf19.6802"	CD36_86920	0.570591	0.762875	0.192284	"S. cerevisiae ortholog PFA3 has protein-cysteine S-palmitoleyltransferase activity, has role in vacuole fusion, non-autophagic, protein palmitoylation and localizes to fungal-type vacuole membrane"
orf19.6801	"RPD31"	CD36_86930	0.499814	-0.0461526	-0.545967	"Putative histone deacetylase; involved in regulation of white-opaque switching"
orf19.6800	"POS5"	CD36_86940	0.279572	-2.5793	-2.85888	"Protein likely to be essential for growth, based on an insertional mutagenesis strategy; similar to S. cerevisiae Pos5p, which is a mitochondrial NADH kinase involved in the oxidative stress response"
orf19.680	"orf19.680"	CD36_10530	0.415668	-2.14052	-2.55619	"Putative mitochondrial translocase complex subunit"
orf19.68.2	"orf19.68.2"	CD36_11670	0.166825	-2.26201	-2.42883	""
orf19.6798	"SSN6"	CD36_86950	-0.808246	-0.342584	0.465662	"Functional homolog of S. cerevisiae Cyc8p/Ssn6p; Ssn6p and Tup1p regulate distinct sets of genes; hyphal growth regulator; overexpression or mutation causes avirulence in mouse IV infection; TPR motifs; repressed during hyphal growth"
orf19.6797	"orf19.6797"	CD36_86960	0.0442512	-4.15674	-4.20099	""
orf19.6796	"orf19.6796"	CD36_86970	1.40381	0.0447582	-1.35905	"S. cerevisiae ortholog YSA1 has ADP-ribose diphosphatase activity, has role in ribose phosphate metabolic process and localizes to mitochondrion, nucleus"
orf19.6795	"orf19.6795"	CD36_86980	0.287652	-1.00645	-1.29411	"Ortholog of S. cerevisiae SUS1"
orf19.6794	"FESUR1"	CD36_86990	0.465694	-1.75377	-2.21946	"Protein described as ubiquinone reductase; transcriptionally induced by interaction with macrophage; alkaline downregulated; repressed by nitric oxide; clade-associated gene expression"
orf19.6793	"orf19.6793"	CD36_87000	0.576287	-0.0390131	-0.6153	""
orf19.6792	"RRD1"	CD36_87010	1.31817	2.12802	0.80985	"Predicted ORF in Assemblies 19, 20 and 21; caspofungin induced"
orf19.6791	"HHT1"	CD36_87020	-0.289598	-0.470537	-0.180939	"Putative histone H3; reduced mRNA abundance detected in homozygous fkh2 null mutant; farnesol regulated"
orf19.6790	"orf19.6790"	CD36_87030	-0.393889	-1.46856	-1.07467	"S. cerevisiae ortholog NGR1 has mRNA binding, has role in 3'-UTR-mediated mRNA destabilization, mitochondrion organization and localizes to perinuclear region of cytoplasm, stress granule, cytoplasmic mRNA processing body"
orf19.679	"FGR39"	CD36_10540	1.85226	-0.542797	-2.39506	"Protein lacking an ortholog in S. cerevisiae; transposon mutation affects filamentous growth"
orf19.6789	"orf19.6789"	CD36_87040	2.01439	-0.775029	-2.78942	""
orf19.6788	"orf19.6788"	CD36_87050	2.06955	4.47871	2.40916	""
orf19.6787	"orf19.6787"	CD36_87060	0.889613	2.50963	1.62002	"S. cerevisiae ortholog ERV14 has role in ascospore formation, axial cellular bud site selection, ER to Golgi vesicle-mediated transport and localizes to endoplasmic reticulum membrane, ER to Golgi transport vesicle"
orf19.6786	"orf19.6786"	CD36_87070	0.75689	-0.667713	-1.4246	""
orf19.6785	"RPS12"	CD36_87080	0.212341	-2.90177	-3.11411	"Protein described as acidic ribosomal protein S12; regulated by Gcn4p, activated by Tbf1p; repressed under amino acid starvation (3-aminotriazole treatment); protein abundance is affected by URA3 expression in the CAI-4 strain background"
orf19.6784	"PGA32"	CD36_87090	0.392144	-4.61702	-5.00916	"Putative GPI-anchored protein of unknown function; transcriptionally regulated by iron; expression greater in high iron"
orf19.6783	"orf19.6783"	CD36_87100	-0.128212	-3.29895	-3.17073	"Putative geranylgeranyltransferase regulatory component"
orf19.6782	"BMT1"	CD36_87110	0.612537	-0.0778101	-0.690347	"Putative beta-mannosyltransferase, required for addition of the first beta-mannose residue to the acid-stable fraction of cell wall phosphopeptidomannan; member of a 9-gene family"
orf19.6781	"orf19.6781"	CD36_87120	1.03706	-2.0446	-3.08166	"Putative transcription factor with zinc finger DNA-binding motif"
orf19.6780	"MET8"	CD36_87130	0.98148	3.33218	2.3507	"Predicted ORF in Assemblies 19, 20 and 21; regulated by Gcn2p and Gcn4p"
orf19.6779	"PRO2"	CD36_87140	0.498684	1.76693	1.26825	"Predicted ORF in Assemblies 19, 20 and 21; regulated by Gcn2p and Gcn4p"
orf19.6778	"orf19.6778"	CD36_87150	0.346816	-1.09471	-1.44152	"S. cerevisiae ortholog DRS2 has role in post-Golgi vesicle-mediated transport, ribosomal small subunit assembly, intracellular protein transport, endocytosis, phospholipid translocation"
orf19.6777	"orf19.6777"	NA	-0.699748	NA	NA	""
orf19.6776	"GCD2"	CD36_87160	0.708648	-1.27913	-1.98778	"Putative translation initiation factor; genes encoding ribosomal subunits, translation factors, and tRNA synthetases are downregulated upon phagocytosis by murine macrophage"
orf19.6773	"ECM29"	CD36_87170	0.628619	2.98679	2.35817	"Protein similar to S. cerevisiae Ecm29p; transposon mutation affects filamentous growth"
orf19.6771	"UBI4"	CD36_87180	-0.325117	-1.47306	-1.14794	"Ubiquitin precursor (polyubiquitin), contains three tandem repeats of the ubiquitin peptide that are processed to individual units; transcription is induced by stress; mRNA found in yeast-form and mycelial cells at similar abundance"
orf19.6770	"orf19.6770"	CD36_87190	-1.10471	-2.75247	-1.64776	""
orf19.677	"CHO1"	CD36_10550	0.929109	-1.95123	-2.88034	"Putative phosphatidylserine synthase; similar to S. cerevisiae Cho1p, which is involved in phosphatidylserine biosynthesis; transposon mutation affects filamentous growth; regulated by Nrg1p, Tup1p; no human or murine homolog"
orf19.6769	"orf19.6769"	CD36_87200	-0.0268051	-0.971172	-0.944367	"S. cerevisiae ortholog OCA5 localizes to cytoplasm"
orf19.6766	"orf19.6766"	CD36_87210	0.583817	-3.36576	-3.94958	"S. cerevisiae ortholog NOP13 localizes to preribosome, nucleolus"
orf19.6763	"SLK19"	CD36_87220	-0.0365702	-0.645264	-0.608693	"Alkaline-induced protein of plasma membrane; affects cell aggregation, cell wall; similar to S. cerevisiae Slk19p (a kinetochore protein with roles in mitosis, meiosis); required for wild-type virulence in mouse; macrophage-downregulated"
orf19.6760	"MDS3"	CD36_87230	-0.387153	-1.84671	-1.45956	"Component of the TOR signaling pathway, required for growth and hyphal formation at pH 9 and for full virulence in a mouse model of systemic infection; has a role in chlamydospore formation"
orf19.676	"orf19.676"	CD36_10560	0.80143	0.176996	-0.624434	"S. cerevisiae ortholog BIM1 has role in nuclear migration along microtubule, mitotic sister chromatid cohesion, negative regulation of microtubule depolymerization, microtubule depolymerization, microtubule nucleation"
orf19.6758	"orf19.6758"	CD36_87240	1.37214	1.14457	-0.227576	""
orf19.6757	"GCY1"	CD36_87250	0.938448	0.496392	-0.442056	"Predicted ORF in Assemblies 19, 20 and 21; mutation confers hypersensitivity to toxic ergosterol analog; farnesol-downregulated; protein detected by mass spec in stationary phase cultures"
orf19.6756	"orf19.6756"	CD36_87260	0.769088	1.55174	0.782654	""
orf19.6755	"orf19.6755"	CD36_87270	0.98093	1.91656	0.935632	"S. cerevisiae ortholog DLD1 has D-lactate dehydrogenase (cytochrome) activity, has role in cellular carbohydrate metabolic process, aerobic respiration and localizes to mitochondrial inner membrane"
orf19.6754	"orf19.6754"	CD36_87280	0.284953	-1.16486	-1.44982	""
orf19.6753	"orf19.6753"	CD36_87290	0.712784	1.50501	0.79223	"Predicted ORF in Assemblies 19, 20 and 21; possibly an essential gene, disruptants not obtained by UAU1 method"
orf19.6752	"orf19.6752"	CD36_87300	1.56901	-1.72226	-3.29128	"S. cerevisiae ortholog RSM10 has structural constituent of ribosome and localizes to mitochondrial small ribosomal subunit"
orf19.6751	"orf19.6751"	CD36_87310	1.23743	-3.96619	-5.20361	"S. cerevisiae ortholog TRM7 has tRNA methyltransferase activity, has role in tRNA methylation, translation and localizes to cytoplasm"
orf19.675.1	"orf19.675.1"	NA	2.51748	NA	NA	""
orf19.675	"orf19.675"	CD36_10570	0.0707702	1.258	1.18723	"Similar to cell wall proteins; induced in core stress response and core caspofungin response; iron-regulated; amphotericin B, ketoconazole, and hypoxia induced; regulated by Cyr1p, Ssn6p"
orf19.6749	"KRS1"	CD36_87320	0.702697	-1.48261	-2.18531	"Putative tRNA-Lys synthetase; genes encoding ribosomal subunits, translation factors, and tRNA synthetases are downregulated upon phagocytosis by murine macrophages; protein detected by mass spec in stationary phase cultures"
orf19.6748	"orf19.6748"	CD36_87330	0.436137	-1.18868	-1.62482	""
orf19.6747	"orf19.6747"	CD36_87340	0.334001	0.841203	0.507201	"S. cerevisiae ortholog DET1 has acid phosphatase activity, has role in intracellular sterol transport, dephosphorylation and localizes to cytoplasm, nucleus"
orf19.6745	"TPI1"	CD36_87350	0.170043	-0.0954176	-0.265461	"Triose-phosphate isomerase; antigenic in mouse or human; mutation affects filamentous growth; biofilm-induced; macrophage-downregulated protein; detected by mass spec in exponential and stationary phase cultures; possibly an essential gene"
orf19.6744	"orf19.6744"	CD36_87360	0.871434	-0.623791	-1.49523	"Ortholog of S. cerevisiae YMR262W"
orf19.6742	"orf19.6742"	CD36_87370	-0.427326	-3.13791	-2.71058	"S. cerevisiae ortholog FCP1 has phosphoprotein phosphatase activity, has role in protein dephosphorylation, transcription and localizes to nucleus"
orf19.6741	"orf19.6741"	CD36_87380	5.35065	8.82473	3.47409	"Predicted ORF in Assemblies 19, 20 and 21; regulated by Nrg1p, Tup1p"
orf19.6740	"orf19.6740"	CD36_87390	0.795051	-2.83864	-3.63369	"S. cerevisiae ortholog PRP19 has ubiquitin-protein ligase activity and has role in generation of catalytic spliceosome for first transesterification step"
orf19.674	"orf19.674"	CD36_10580	-0.454105	-3.9311	-3.477	""
orf19.6739	"orf19.6739"	CD36_87400	0.344293	1.49931	1.15502	"S. cerevisiae ortholog PGM3 has phosphoglucomutase activity and localizes to cytoplasm, nucleus"
orf19.6738	"VAN1"	CD36_87410	0.568635	-0.598691	-1.16733	"Member of Mnn9p family of mannosyltransferases; similar to S. cerevisiae Van1p; fungal-specific (no human or murine homolog)"
orf19.6737	"orf19.6737"	CD36_87420	2.12432	-0.7334	-2.85772	"Protein not essential for viability; greater mRNA abundance observed in a cyr1, ras1, or efg1 homozygous null mutant than in wild type"
orf19.6736	"orf19.6736"	CD36_87430	0.423973	-4.78406	-5.20803	"S. cerevisiae ortholog GEP3 localizes to mitochondrion"
orf19.6734	"TCC1"	CD36_87440	1.08156	0.0381266	-1.04343	"Protein involved in regulation of filamentous growth and virulence; interacts with Tup1p; acts in transcriptional regulation of hypha-specific genes; contains 4 tetratricopeptide repeat (TPR) motifs; flucytosine repressed; Tbp1p-activated"
orf19.6732	"orf19.6732"	CD36_87450	-0.331744	-3.78545	-3.45371	"Ortholog of S. cerevisiae YCR015C"
orf19.6731.1	"orf19.6731.1"	CD36_87460	0.423906	-0.157781	-0.581687	""
orf19.6731	"orf19.6731"	CD36_87470	0.412844	-1.03603	-1.44888	"Predicted ORF in Assemblies 19, 20 and 21; transcription is repressed in response to alpha pheromone in SpiderM medium"
orf19.6730	"orf19.6730"	CD36_87480	0.415589	0.881414	0.465825	"S. cerevisiae ortholog YCR016W localizes to nucleolus"
orf19.673	"orf19.673"	CD36_10590	-0.30979	-1.16847	-0.858676	""
orf19.6729	"TIP120"	CD36_87490	0.718717	-0.382794	-1.10151	"Protein similar to human and rat TBP-binding transcription regulatory protein; not essential for viability"
orf19.6727	"RIT1"	CD36_87500	-0.248891	-2.99781	-2.74892	"Putative initiator tRNA methionine ribosyltransferase; fungal-specific (no human or murine homolog)"
orf19.6726	"orf19.6726"	CD36_87510	-0.526656	-0.588119	-0.0614633	"S. cerevisiae ortholog SPT2 has role in chromatin organization, RNA elongation from RNA polymerase II promoter, negative regulation of transcription from RNA polymerase II promoter, global, RNA polyadenylation"
orf19.6724	"FUM12"	CD36_87520	0.927344	-1.52535	-2.45269	"Protein described as similar to fumarate hydratase, enzyme of citric acid cycle; fluconazole-downregulated; downregulated by Efg1p; transcriptionally regulated by iron; expression greater in high iron"
orf19.6723	"orf19.6723"	CD36_87530	0.70431	-2.58639	-3.2907	""
orf19.6722	"orf19.6722"	CD36_87540	0.201437	-2.32338	-2.52482	"Predicted ORF in Assemblies 19, 20 and 21; similar to S. cerevisiae Rad4p; down-regulation associated with azole resistance"
orf19.6720	"orf19.6720"	CD36_87550	-0.537767	0.175457	0.713224	"Predicted ORF in Assemblies 19, 20 and 21; similar to S. cerevisiae Ydr090cp; transposon mutation affects filamentous growth"
orf19.672	"orf19.672"	CD36_10600	0.0262584	-1.34417	-1.37043	""
orf19.6719	"orf19.6719"	CD36_87560	-0.627766	-0.441173	0.186593	"Putative protein of unknown function; homozygous transposon insertion causes decreased colony wrinkling under filamentous growth-inducing conditions, but does not block true hyphal formation in liquid media"
orf19.6718	"orf19.6718"	CD36_87570	1.03882	-0.0840927	-1.12291	""
orf19.6717	"orf19.6717"	CD36_87580	0.831407	-0.625218	-1.45663	"S. cerevisiae ortholog FSH1 localizes to cytoplasm, nucleus"
orf19.6716	"ABD1"	CD36_87590	0.0675357	-0.897206	-0.964741	"RNA (guanine-N7-)-methyltransferase, SAM-dependent; methylates mRNA 5' cap; binds phosphorylated RNA Pol II C-terminal domain peptide; does not bind mRNA TPase and mRNA GTase (Cet1p and Cgt1p); functional homolog of S. cerevisiae Abd1p"
orf19.6715	"orf19.6715"	NA	NaN	NA	NA	""
orf19.6713	"orf19.6713"	CD36_87600	0.787566	-1.01029	-1.79785	""
orf19.6712	"orf19.6712"	CD36_87610	0.62903	-0.504768	-1.1338	"S. cerevisiae ortholog SGM1 localizes to Golgi apparatus, COPI-coated vesicle"
orf19.6710	"UTP9"	CD36_87620	0.403566	-2.62809	-3.03166	"Predicted ORF in Assemblies 19, 20 and 21; decreased expression observed in an ssr1 homozygous null mutant; decreased expression in response to prostaglandins; physically interacts with TAP-tagged Nop1p"
orf19.671	"PSP1"	CD36_10610	0.11815	-1.43147	-1.54962	"Protein repressed during the mating process"
orf19.6709	"orf19.6709"	CD36_87630	0.817995	-1.32516	-2.14315	""
orf19.6707	"orf19.6707"	CD36_73160	0.666644	0.712617	0.0459728	"Predicted ORF in Assemblies 19, 20 and 21; transcription is repressed in response to alpha pheromone in SpiderM medium"
orf19.6706	"GYP7"	CD36_73150	-0.073602	1.48298	1.55658	"Predicted ORF in Assemblies 19, 20 and 21; similar to S. cerevisiae Gyp7p (GTPase-activating protein for Ypt1p); caspofungin-induced"
orf19.6705	"orf19.6705"	CD36_73140	1.3618	-1.66955	-3.03135	"Putative guanyl nucleotide exchange factor with Sec7 domain, required for normal filamentous growth; transcriptionally regulated upon yeast-hyphal switch; filament induced; regulated by Nrg1p, Tup1p, Mob2p; mRNA binds to She3p"
orf19.6704	"orf19.6704"	NA	-0.0533849	NA	NA	""
orf19.6703	"orf19.6703"	CD36_73260	0.108936	2.41321	2.30427	""
orf19.6702	"DED81"	CD36_73270	1.26957	0.398193	-0.871377	"Putative tRNA-Asn synthetase; genes encoding ribosomal subunits, translation factors, and tRNA synthetases are downregulated upon phagocytosis by murine macrophage"
orf19.6701	"orf19.6701"	CD36_73280	0.739938	-1.67346	-2.4134	"Predicted ORF in Assemblies 19, 20 and 21; protein detected by mass spec in stationary phase cultures"
orf19.670.2	"orf19.670.2"	NA	0.153715	NA	NA	"ORF Predicted by Annotation Working Group; hypoxia downregulated, ketoconazole induced"
orf19.670	"SMT3"	CD36_10630	0.754745	2.03379	1.27904	"SUMO, small ubiquitin-like protein; Smt3p-conjugated proteins localize to septation site and mother side of bud neck; C. albicans septins appear not to be Smt3p-modified, in contrast to S. cerevisiae septins; similar to S. cerevisiae Smt3p"
orf19.6699	"orf19.6699"	CD36_73290	0.946755	0.495509	-0.451246	"S. cerevisiae ortholog HIS2 has histidinol-phosphatase activity and has role in histidine biosynthetic process"
orf19.6698	"orf19.6698"	CD36_73300	0.79242	-2.04156	-2.83399	"S. cerevisiae ortholog SLM5 has asparagine-tRNA ligase activity, has role in mitochondrial asparaginyl-tRNA aminoacylation and localizes to mitochondrion"
orf19.6696	"TIM9"	CD36_73310	0.957818	-1.2273	-2.18511	"Predicted ORF in Assemblies 19, 20 and 21; transcription is upregulated in both intermediate and mature biofilms"
orf19.6694	"orf19.6694"	CD36_73320	-0.19792	-1.17734	-0.97942	""
orf19.6693	"orf19.6693"	CD36_73330	-0.873217	-2.06802	-1.19481	"S. cerevisiae ortholog YOL098C localizes to cytoplasm"
orf19.6692	"MNN7"	CD36_73340	0.506316	-1.04946	-1.55577	"Protein described as mannosyltransferase; identified in detergent-resistant membrane fraction (possible lipid raft component); predicted N-terminal acetylation and transmembrane helix"
orf19.6691	"orf19.6691"	CD36_73350	0.898524	-1.96829	-2.86681	"S. cerevisiae ortholog YHR032W has role in S-adenosylmethionine biosynthetic process"
orf19.6690	"orf19.6690"	CD36_63200	0.161976	-0.907128	-1.0691	""
orf19.6690	"orf19.6690"	CD36_73110	0.161976	-0.973498	-1.13547	""
orf19.669	"PRM1"	CD36_10640	0.187777	4.6986	4.51082	"Protein induced during the mating process"
orf19.6689	"ARG4"	CD36_73220	1.13162	-1.19998	-2.3316	"Argininosuccinate lyase, catalyzes the final step in the arginine biosynthesis pathway; alkaline downregulated"
orf19.6688	"orf19.6688"	CD36_73210	-0.235072	-0.988731	-0.753659	"Decreased transcription is observed upon benomyl treatment or in an azole-resistant strain that overexpresses MDR1"
orf19.6687	"orf19.6687"	CD36_73200	3.04637	5.71166	2.66529	""
orf19.6686	"ENP2"	CD36_73190	0.281683	-0.731336	-1.01302	"Predicted ORF in Assemblies 19, 20 and 21; essential; S. cerevisiae ortholog is essential; heterozygous mutation confers resistance to 5-fluorocytosine (5-FC), 5-fluorouracil (5-FU), and tubercidin (7-deazaadenosine)"
orf19.6685	"ISY1"	CD36_73180	0.188345	-2.64187	-2.83021	"Predicted ORF in Assemblies 19, 20 and 21; mutation confers resistance to 5-fluorocytosine (5-FC)"
orf19.6684	"PNC1"	CD36_73170	0.42331	1.21135	0.788045	"Putative nicotinamidase, involved in NAD salvage pathway; decreased transcription is observed in an azole-resistant strain that overexpresses MDR1"
orf19.6681	"orf19.6681"	CD36_53400	0.727049	-1.95677	-2.68382	""
orf19.6681	"orf19.6681"	CD36_53430	0.727049	-5.68877	-6.41582	""
orf19.6680	"FGR27"	CD36_53410	-0.0885953	-1.9026	-1.81401	"Putative transcription factor with zinc cluster DNA-binding motif; lacks an ortholog in S. cerevisiae; transposon mutation affects filamentous growth"
orf19.668	"orf19.668"	CD36_10650	1.60566	-1.874	-3.47966	""
orf19.6679	"orf19.6679"	CD36_53420	1.514	-0.280126	-1.79412	""
orf19.6678	"orf19.6678"	NA	2.97714	NA	NA	""
orf19.6676	"orf19.6676"	CD36_53390	1.88522	-Inf	-Inf	""
orf19.6674	"BTS1"	CD36_53370	1.198	2.00433	0.806324	"Decreased transcription is observed upon benomyl treatment"
orf19.6673	"HEX1"	CD36_53360	-0.253133	-2.22279	-1.96965	"Beta-N-acetylhexosaminidase/chitobiase, highly glycosylated enzyme that is secreted to the periplasm and culture medium; required for full virulence; may have role in carbon or nitrogen scavenging; possibly an essential gene (UAU1 method)"
orf19.6672	"MDJ1"	CD36_53350	0.542138	-3.27945	-3.82159	"S. cerevisiae ortholog MDJ1 has role in mitochondrial genome maintenance, misfolded or incompletely synthesized protein catabolic process, 'de novo' protein folding, protein refolding, response to heat"
orf19.6671	"LAP4"	CD36_53340	0.1895	-1.89456	-2.08406	"Protein similar to aminopeptidase I; mutation confers hypersensitivity to amphotericin B; transcriptionally regulated during macrophage response"
orf19.6670	"CAC2"	CD36_53330	0.815123	-2.78594	-3.60106	"Predicted ORF in Assemblies 19, 20 and 21; macrophage-induced gene"
orf19.667.1	"RPL37B"	NA	1.16086	NA	NA	"Ribosomal protein L37"
orf19.6668	"orf19.6668"	CD36_53320	1.27753	2.1032	0.825669	"S. cerevisiae ortholog CUE1 has ubiquitin binding and has role in ER-associated protein catabolic process, establishment of protein localization"
orf19.6667	"orf19.6667"	CD36_53310	1.37826	1.47365	0.0953929	"Ortholog of S. cerevisiae SAP30"
orf19.6665	"orf19.6665"	CD36_53300	0.339192	-1.77209	-2.11128	"S. cerevisiae ortholog NUP2 has role in protein targeting to membrane, nuclear-transcribed mRNA catabolic process, non-stop decay, chromatin silencing at telomere and localizes to nuclear chromatin, mitochondrion, nuclear pore"
orf19.6663	"RPS25B"	CD36_53290	1.15741	-0.209076	-1.36648	"Predicted ribosomal protein; macrophage/pseudohyphal-induced after 16 h; downregulated upon phagocytosis by murine macrophage; transcription is positively regulated by Tbf1p; intron in 5'-UTR"
orf19.6662	"orf19.6662"	CD36_53280	1.43204	2.86087	1.42883	"Putative protein of unknown function, transcription is upregulated in clinical isolates from HIV+ patients with oral candidiasis"
orf19.6661	"orf19.6661"	NA	Inf	NA	NA	"Predicted ORF from Assembly 19; removed from Assembly 20; subsequently reinstated in Assembly 21 based on comparative genome analysis"
orf19.6660	"orf19.6660"	CD36_53260	-1.6069	-2.36863	-0.761733	"Putative protein of unknown function; mRNA binds to She3p"
orf19.666	"orf19.666"	NA	-0.150368	NA	NA	""
orf19.6659	"GAP6"	CD36_53250	-3.47475	-3.89762	-0.422875	"Putative general amino acid permease; Plc1p-regulated; Gcn4p-regulated; fungal-specific (no human or murine homolog)"
orf19.6658	"orf19.6658"	NA	0.0420337	NA	NA	"Predicted ORF from Assembly 19; removed from Assembly 20; subsequently reinstated in Assembly 21 based on comparative genome analysis; protein detected by mass spec in stationary phase cultures"
orf19.6656	"DUR3"	CD36_53230	-0.300123	-1.67676	-1.37664	"Putative urea transporter; transcription is upregulated in clinical isolates from HIV+ patients with oral candidiasis; alkaline downregulated; amphotericin B induced; shows colony morphology-related gene regulation by Ssn6p"
orf19.6654	"orf19.6654"	CD36_53220	0.761487	-1.05523	-1.81672	"Predicted membrane transporter, member of the L-amino acid transporter-3 (LAT3) family, major facilitator superfamily (MFS)"
orf19.6653	"orf19.6653"	CD36_30960	0.309267	-0.988122	-1.29739	"S. cerevisiae ortholog MTG2 has ribosome binding, has role in translation and localizes to mitochondrial inner membrane, extrinsic to membrane"
orf19.6652	"DBP8"	CD36_30970	0.748072	-2.56351	-3.31159	"Protein similar to S. cerevisiae Dbp8p, an ATP-dependent helicase involved in rRNA processing; oxidative stress-repressed via Cap1p; flucytosine repressed; likely to be essential for growth, based on insertional mutagenesis"
orf19.6650	"orf19.6650"	CD36_30990	1.12844	2.12403	0.995588	""
orf19.665	"NEP1"	CD36_10670	1.10139	-2.22225	-3.32364	"Ortholog of S. cerevisiae EMG1"
orf19.6649	"BRF1"	CD36_31000	0.496035	0.121513	-0.374522	"Component of the general transcription factor for RNA polymerase III (TFIIIB); possibly an essential gene, disruptants not obtained by UAU1 method"
orf19.6648	"SDA1"	CD36_31020	0.0797056	-2.84056	-2.92026	"Predicted ORF in Assemblies 19, 20 and 21; transcription is upregulated in both intermediate and mature biofilms"
orf19.6645	"HMO1"	CD36_31040	-0.5192	-0.268954	0.250246	"Transcription factor that binds upstream of genes involved in hexose and ergosterol metabolism and in the cell cycle; activates pseudohyphal growth when expressed in S. cerevisiae; expression repressed in hyphae relative to yeast-form cells"
orf19.6644	"orf19.6644"	NA	-0.251358	NA	NA	"Predicted ORF in Assemblies 19, 20 and 21; transcription detected in high-resolution tiling array experiments"
orf19.6643	"MCT1"	CD36_31050	0.867181	-0.451369	-1.31855	"Putative malonyl-CoA acyl carrier protein acyltransferase"
orf19.6642	"orf19.6642"	CD36_31060	1.65127	-0.228839	-1.88011	"S. cerevisiae ortholog YIF1 has role in ER to Golgi vesicle-mediated transport and localizes to endoplasmic reticulum membrane, integral to Golgi membrane, ER to Golgi transport vesicle"
orf19.6641	"orf19.6641"	CD36_31080	0.965385	2.42022	1.45483	""
orf19.6641	"orf19.6641"	CD36_73120	0.965385	-0.282527	-1.24791	""
orf19.6640	"TPS1"	CD36_31110	1.18124	1.36732	0.18608	"Trehalose-6-phosphate synthase; role in hyphal growth and virulence in mouse systemic infection; upregulated in presence of human neutrophils; macrophage/pseudohyphal-repressed after 16h; detected by mass spec in stationary phase cultures"
orf19.664	"orf19.664"	CD36_10680	-2.43671	2.08359	4.52031	""
orf19.6639	"orf19.6639"	CD36_31120	0.134524	1.00496	0.870433	""
orf19.6638	"PTC4"	CD36_31140	-0.711521	0.603293	1.31482	"Type PP2C serine/threonine phosphatase; localized to mitochondria; mutation causes sensitivity to sodium, potassium and azole drugs; decreased expression in hyphae compared to yeast-form cells"
orf19.6637	"orf19.6637"	CD36_31150	0.278108	-0.237433	-0.515541	"Predicted ORF in Assemblies 19, 20 and 21; induced by hypoxia"
orf19.6636	"orf19.6636"	CD36_31160	0.5299	-1.31547	-1.84537	"Ortholog of S. cerevisiae YPR084W"
orf19.6635	"orf19.6635"	CD36_31170	-0.165642	0.404397	0.570039	""
orf19.6634	"VMA2"	CD36_31180	0.778253	-0.920739	-1.69899	"Vacuolar H(+)-ATPase; protein detected by mass spec in exponential and stationary phase cultures; plasma membrane localized; amphotericin B repressed, caspofungin repressed"
orf19.6632	"ACO2"	CD36_31190	0.479712	0.777793	0.298081	"Protein described as aconitate hydratase 2; regulated by Gcn4p; repressed in response to amino acid starvation (3-aminotriazole treatment); transcriptionally regulated by iron; expression greater in high iron"
orf19.6630	"orf19.6630"	CD36_31210	1.4604	2.54515	1.08475	"S. cerevisiae ortholog YLR104W has role in ER-associated protein catabolic process"
orf19.663	"GIN4"	CD36_10690	1.45861	-1.65204	-3.11065	"Autophosphorylated kinase; role in pseudohyphal-hyphal switch and cytokinesis; phosphorylates Cdc11p on S395 (regulatory); necessary for septin ring within germ tube but not for septin band at mother cell junction"
orf19.6629	"ISC1"	CD36_31220	0.955248	-0.577514	-1.53276	"Putative phospholipase C, possible neutral sphingomyelinase; not essential for viability"
orf19.6628	"orf19.6628"	CD36_31230	0.934653	0.577125	-0.357528	""
orf19.6627	"orf19.6627"	CD36_31240	1.27471	0.347325	-0.927385	"Predicted ORF in Assemblies 19, 20 and 21; possibly transcriptionally regulated upon hyphal formation"
orf19.6626	"orf19.6626"	CD36_31250	0.133778	0.102602	-0.031176	"Predicted ORF in Assemblies 19, 20 and 21; possibly transcriptionally regulated upon hyphal formation"
orf19.6625	"orf19.6625"	CD36_31260	0.289602	-0.494684	-0.784286	"S. cerevisiae ortholog VPS75 has histone binding, acetyltransferase activator activity and has role in nucleosome assembly, double-strand break repair via nonhomologous end joining, positive regulation of histone acetylation"
orf19.6624	"orf19.6624"	CD36_31270	1.25456	0.886668	-0.36789	""
orf19.6623	"orf19.6623"	CD36_31290	0.0356986	-1.83592	-1.87161	"S. cerevisiae ortholog ELF1 has RNA polymerase II transcription elongation factor activity, has role in chromatin organization, RNA elongation from RNA polymerase II promoter and localizes to nucleus"
orf19.6621	"MHP1"	CD36_31300	0.00457765	-0.430811	-0.435389	"Protein similar to S. cerevisiae Mhp1p, which is involved in microtubule stabilization; transposon mutation affects filamentous growth; possibly transcriptionally regulated upon hyphal formation; possibly an essential gene (by UAU1 method)"
orf19.6612	"orf19.6612"	CD36_34765	1.03125	0.51015	-0.5211	"S. cerevisiae ortholog YGR207C localizes to mitochondrion"
orf19.6610	"orf19.6610"	CD36_34770	-0.278104	-0.407717	-0.129613	""
orf19.661	"KRR1"	CD36_10710	0.23484	-2.0171	-2.25194	"Decreased transcription is observed upon benomyl treatment or in an azole-resistant strain that overexpresses MDR1; induced upon biofilm formation"
orf19.6608	"orf19.6608"	CD36_34780	2.89621	-0.947883	-3.84409	"Predicted ORF in Assemblies 19, 20 and 21; downregulation correlates with clinical development of fluconazole resistance"
orf19.6607	"orf19.6607"	CD36_34785	1.84664	-0.649133	-2.49577	""
orf19.6606	"orf19.6606"	NA	2.31119	NA	NA	""
orf19.6605	"orf19.6605"	CD36_34795	0.651693	2.15076	1.49906	"S. cerevisiae ortholog YOR292C localizes to fungal-type vacuole"
orf19.6604	"orf19.6604"	CD36_34800	1.92102	-2.47208	-4.3931	"Predicted ORF in Assemblies 19, 20 and 21; greater mRNA abundance observed in a cyr1 homozygous null mutant than in wild type; contains 5' UTR intron"
orf19.6602	"orf19.6602"	CD36_34805	1.28056	-0.607949	-1.8885	"S. cerevisiae ortholog COQ9 has role in aerobic respiration, ubiquinone biosynthetic process and localizes to mitochondrial inner membrane"
orf19.6601.1	"YKE2"	CD36_34807	2.66861	1.19199	-1.47662	"Possible cytoskeletal modulator; transcription induced upon yeast-to-hyphal switch; regulated by Nrg1p, Tup1p"
orf19.6601	"orf19.6601"	CD36_34810	-0.286186	-0.389852	-0.103666	""
orf19.6600	"orf19.6600"	CD36_34815	-0.743648	-3.55399	-2.81034	"S. cerevisiae ortholog UPS1 has role in cardiolipin metabolic process and localizes to extrinsic to mitochondrial inner membrane, mitochondrial intermembrane space"
orf19.660	"orf19.660"	CD36_10720	1.02432	-1.7282	-2.75252	"Putative protein of unknown function; mRNA binds to She3p"
orf19.6599.1	"orf19.6599.1"	CD36_34817	0.0466239	-0.856571	-0.903195	""
orf19.6598	"WAL1"	CD36_34820	0.110878	-2.46314	-2.57402	"Protein required for hyphal growth and for wild-type cell morphology, polarized budding, endocytosis, vacuole morphology; similar to Wiskott-Aldrich syndrome protein; localizes to cortical actin patches and hyphal tips"
orf19.6597	"orf19.6597"	CD36_34830	0.92748	-1.85452	-2.782	"S. cerevisiae ortholog YLR287C localizes to cytoplasm"
orf19.6596	"orf19.6596"	CD36_34840	1.63202	2.91415	1.28213	"Protein of unknown function; possibly transcriptionally regulated by Tac1p; transcriptionally activated by Mnl1p under weak acid stress; protein detected by mass spec in exponential and stationary phase cultures"
orf19.6595	"RTA4"	CD36_34850	1.77721	2.13824	0.361032	"Predicted ORF in Assemblies 19, 20 and 21; similar to S. cerevisiae Yor049cp, which is involved in fatty acid transport; transposon mutation affects filamentous growth; alkaline downregulated; caspofungin induced; possibly an essential gene"
orf19.6594	"PLB3"	CD36_34860	0.830252	1.07414	0.243883	"GPI-anchored cell surface phospholipase B; similar to S. cerevisiae Plb3p; fungal-specific (no human or murine homolog); transcription is positively regulated by Tbf1p; possibly an essential gene, disruptants not obtained by UAU1 method"
orf19.6592	"orf19.6592"	CD36_34870	0.388947	-2.60024	-2.98919	"Predicted membrane transporter, member of the aromatic acid:proton symporter (AAHS) family, major facilitator superfamily (MFS)"
orf19.6591	"orf19.6591"	CD36_34880	-0.114923	-2.6307	-2.51578	"S. cerevisiae ortholog PCD1 has pyrophosphatase activity and localizes to peroxisome"
orf19.6590	"VMA22"	CD36_34885	0.313587	-3.84014	-4.15373	""
orf19.6589	"orf19.6589"	CD36_34890	-0.51878	-2.84826	-2.32948	"Ortholog of S. cerevisiae SSF2 and SSF1"
orf19.6588	"NBP2"	CD36_71240	-0.803935	1.00876	1.8127	"Protein containing an SH3 domain, involved in vacuolar fusion in hyphae; mutants form multiple germ tubes"
orf19.6587	"orf19.6587"	CD36_71250	0.396552	-0.119897	-0.51645	"Protein similar to S. cerevisiae Ydr152wp; transposon mutation affects filamentous growth"
orf19.6586	"orf19.6586"	CD36_71260	1.17766	2.49235	1.3147	"Protein of unknown function; increased transcription observed upon benomyl treatment or in an azole-resistant strain that overexpresses MDR1; shows colony morphology-related gene regulation by Ssn6p; induced by nitric oxide"
orf19.6585	"orf19.6585"	CD36_71270	1.05055	-2.14917	-3.19972	"Ortholog of S. cerevisiae AIM1"
orf19.6584	"PRT1"	CD36_71280	0.0224187	-2.52353	-2.54595	"Putative translation initiation factor; mutation confers hypersensitivity to roridin A and verrucarin A; genes encoding ribosomal subunits, translation factors, and tRNA synthetases are downregulated upon phagocytosis by murine macrophage"
orf19.6583	"orf19.6583"	CD36_71290	1.15054	0.462688	-0.687849	"Predicted ORF in Assemblies 19, 20 and 21; transcription is induced in response to alpha pheromone in SpiderM medium"
orf19.6582	"PRE10"	CD36_71300	0.724477	1.28564	0.561164	"Alpha7 (C8) subunit of the 20S proteasome; multiple phosphorylated residues; transcription is induced upon filamentous growth"
orf19.6581	"orf19.6581"	CD36_71310	1.01432	1.93309	0.918771	"S. cerevisiae ortholog PFA4 has protein-cysteine S-palmitoleyltransferase activity, has role in protein palmitoylation and localizes to endoplasmic reticulum"
orf19.6580	"orf19.6580"	CD36_71330	0.79414	-0.49692	-1.29106	""
orf19.658	"GIN1"	CD36_10730	0.240456	-1.61946	-1.85992	"Protein involved in regulation of DNA-damage-induced filamentous growth; putative component of DNA replication checkpoint; ortholog of S. cerevisiae Mrc1p, an S-phase checkpoint protein"
orf19.6579	"orf19.6579"	CD36_71340	2.05514	1.95077	-0.104375	""
orf19.6578	"orf19.6578"	CD36_71350	1.96246	4.43183	2.46937	"Predicted membrane transporter, member of the vesicular neurotransmitter (VNT) family, major facilitator superfamily (MFS); downregulated in core caspofungin response"
orf19.6577	"FLU1"	CD36_71360	0.825285	-3.56021	-4.38549	"Multidrug efflux pump of the plasma membrane; MDR family member of the MFS (major facilitator superfamily) of transporters; preferred substrate may be mycophenolic acid; fungal-specific (no human or murine homolog)"
orf19.6575	"orf19.6575"	NA	NaN	NA	NA	""
orf19.6574	"ALK6"	CD36_71370	-0.669691	0.417573	1.08726	"Protein described as cytochrome P-450 of N-alkane-induced detoxification; macrophage-induced gene"
orf19.6573	"BEM2"	CD36_71380	-0.232544	-1.3648	-1.13225	"Putative Rho1p GTPase activating protein (GAP); serum-induced transcription"
orf19.6570	"NUP"	CD36_71390	1.06776	-0.398194	-1.46595	"Nucleoside permease; adenosine and guanosine are substrates, whereas cytidine, adenine, guanine, uridine, uracil are not; similar to a nucleoside permease of S. pombe; possibly processed by Kex2p"
orf19.657	"SAM2"	CD36_10740	0.194481	-1.9442	-2.13868	"S-adenosylmethionine synthetase, localizes to surface of hyphal cells, but not yeast-form cells; possible biofilm-induced expression (reports differ); alkaline upregulated; Hog1p-induced; farnesol-downregulated"
orf19.6569	"orf19.6569"	CD36_71400	2.84215	5.21633	2.37418	""
orf19.6568	"SMC6"	CD36_71410	0.327438	-0.827683	-1.15512	"Predicted ORF in Assemblies 19, 20 and 21; cell-cycle regulated periodic mRNA expression; S. cerevisiae ortholog is not cell-cycle regulated"
orf19.6566	"orf19.6566"	CD36_71420	0.885215	-1.49464	-2.37986	""
orf19.6565	"orf19.6565"	CD36_71430	1.78104	-1.0247	-2.80574	"S. cerevisiae ortholog OXA1 has ribosome binding, membrane insertase activity and has role in mitochondrial proton-transporting ATP synthase complex assembly, protein insertion into mitochondrial membrane from inner side"
orf19.6563.1	"orf19.6563.1"	NA	1.40101	NA	NA	"S. cerevisiae ortholog RRG10 has role in negative regulation of mitochondrial translation, mitochondrial respiratory chain complex IV assembly and localizes to mitochondrial inner membrane"
orf19.6563	"orf19.6563"	CD36_71450	1.21899	1.11648	-0.102508	"Predicted ORF in Assemblies 19, 20 and 21; transcription is induced in response to alpha pheromone in SpiderM medium"
orf19.6562	"RNH35"	CD36_71460	1.1382	-0.938312	-2.07651	"Predicted ORF in Assemblies 19, 20 and 21; flucytosine induced"
orf19.6561	"LAT1"	CD36_71470	0.784775	-0.044168	-0.828943	"Protein described as dihydrolipoamide acetyltransferase component (E2) of pyruvate dehydrogenase complex"
orf19.656	"DPP1"	NA	0.352788	NA	NA	"Putative diacylglycerol pyrophosphate phosphatase of diacylglycerol production for phospholipid biosynthesis; downregulation correlates with clinical development of fluconazole resistance"
orf19.6559	"orf19.6559"	CD36_71490	0.618266	1.2415	0.623234	"Predicted ORF in Assemblies 19, 20 and 21; protein level decreased in stationary phase cultures"
orf19.6558	"orf19.6558"	CD36_71500	1.15304	-0.755817	-1.90885	""
orf19.6557	"orf19.6557"	CD36_71510	0.767482	-0.434091	-1.20157	"Predicted ORF in Assemblies 19, 20 and 21; transcriptionally activated by Mnl1p under weak acid stress"
orf19.6556	"orf19.6556"	CD36_71520	1.73783	3.21148	1.47365	""
orf19.6555	"orf19.6555"	CD36_71530	0.710128	-2.33877	-3.04889	"S. cerevisiae ortholog HOT13 has role in protein import into mitochondrial intermembrane space and localizes to mitochondrial intermembrane space"
orf19.6554	"orf19.6554"	CD36_71540	0.666863	1.93604	1.26917	"Predicted ORF in Assemblies 19, 20 and 21; expression upregulated by ketoconazole, by hypoxia and during growth in the mouse cecum"
orf19.6553	"orf19.6553"	CD36_71550	1.29959	0.873726	-0.425861	"Membrane-localized protein"
orf19.6552	"orf19.6552"	CD36_71560	0.27989	0.854984	0.575094	"S. cerevisiae ortholog ERV2 has thiol oxidase activity, has role in protein thiol-disulfide exchange and localizes to microsome"
orf19.6551.1	"STE18"	CD36_71570	-0.436714	-0.0804541	0.35626	"Protein similar to S. cerevisiae Ste18p; expressed in opaque or white MTLa/MTLa or MTLalpha/MTLalpha, but not MTLa/MTLalpha cells; MTLa1p, MTLalpha2p bind promoter region"
orf19.6551	"orf19.6551"	CD36_71580	-0.528506	0.660459	1.18897	"S. cerevisiae ortholog GOS1 has SNAP receptor activity, has role in Golgi vesicle transport, vesicle fusion and localizes to Golgi medial cisterna, SNARE complex"
orf19.6550	"orf19.6550"	CD36_71590	-0.527622	-0.670367	-0.142745	"S. cerevisiae ortholog YOR228C localizes to mitochondrial outer membrane"
orf19.655	"PHO84"	CD36_10770	2.08923	-2.4483	-4.53754	"Protein similar to high-affinity phosphate transporters; expression is regulated upon white-opaque switching or biofilm formation; Hog1p, ciclopirox olamine or alkaline induced; caspofungin or stress repressed; upregulated in RHE model"
orf19.6548	"ISU1"	CD36_71600	0.11534	-0.844938	-0.960278	"Protein with similarity to NifU; possible role in iron-sulfur cluster biogenesis; transcriptionally regulated by iron; expression greater in low iron; transcription is upregulated in both intermediate and mature biofilms"
orf19.6547	"orf19.6547"	NA	Inf	NA	NA	""
orf19.6544	"LPI9"	CD36_71610	-0.300661	-1.64583	-1.34517	"S. cerevisiae ortholog GIP3 has protein phosphatase type 1 regulator activity, protein phosphatase 1 binding and has role in regulation of phosphoprotein phosphatase activity, chromosome segregation"
orf19.6541	"RPL5"	CD36_71620	0.852342	-2.04989	-2.90223	"Predicted ribosomal protein; genes encoding cytoplasmic ribosomal subunits, translation factors, and tRNA synthetases are downregulated upon phagocytosis by murine macrophage"
orf19.6540	"PFK2"	CD36_71630	-0.933247	-2.93492	-2.00167	"Beta subunit of phosphofructokinase (PFK), which is a heteromultimer of Pfk1p and Pfk2p; PFK is activated by fructose 2,6-bisphosphate or AMP, inhibited by ATP; downregulated upon phagocytosis or hyphal growth; fluconazole-induced"
orf19.654	"orf19.654"	CD36_30570	9.49642	17.9022	8.40577	""
orf19.654	"orf19.654"	CD36_30400	9.49642	17.7029	8.2065	""
orf19.6539	"orf19.6539"	CD36_71640	0.866679	-0.934603	-1.80128	"Predicted ORF in Assemblies 19, 20 and 21; heterozygous null mutant displays sensitivity to virgineone"
orf19.6538	"VMA11"	CD36_71650	1.45254	0.471257	-0.981282	"Predicted ortholog of S. cerevisiae Tfp3p, which is the c' subunit of the V0 subcomplex of the vacuolar ATPase; required for hemoglobin-iron utilization"
orf19.6537	"orf19.6537"	CD36_71660	1.07994	-1.11022	-2.19016	"S. cerevisiae ortholog NSL1 has role in chromosome segregation and localizes to nuclear MIS12/MIND type complex, spindle pole"
orf19.6536	"IQG1"	CD36_71670	2.54778	0.57267	-1.97511	"Component of actomyosin ring at bud neck; cell-cycle regulated serine phosphorylation at CDK sites regulates association with formins Bni1p and Bnr1p, Iqg1p degradation, and ring disassembly; mutation causes severe cytokinetic defects"
orf19.6534.2	"orf19.6534.2"	CD36_71680	0.682885	1.25957	0.576681	"S. cerevisiae ortholog CRN1 has role in actin filament organization, microtubule-based process, negative regulation of Arp2/3 complex-mediated actin nucleation, actin cortical patch localization"
orf19.6534	"orf19.6534"	NA	-0.321236	NA	NA	""
orf19.6533	"MSK1"	CD36_71690	0.88167	-2.55882	-3.44049	"Predicted ORF in Assemblies 19, 20 and 21; flucytosine repressed"
orf19.6532	"orf19.6532"	CD36_71700	1.28575	-1.40238	-2.68813	"S. cerevisiae ortholog FLX1 has FAD transmembrane transporter activity, has role in FAD transport and localizes to mitochondrion"
orf19.6531.1	"TOM71"	NA	0.400228	NA	NA	"ORF Predicted by Annotation Working Group; flucytosine induced"
orf19.6531	"NUC2"	CD36_71710	0.926826	-1.46479	-2.39161	"Protein described as NADH-ubiquinone oxidoreductase; identified in detergent-resistant membrane fraction (possible lipid raft component); alkaline downregulated"
orf19.6530	"orf19.6530"	CD36_71720	1.64633	0.273923	-1.37241	"Similar to bacterial DnaJ; transcriptionally regulated by iron; expression greater in low iron"
orf19.653	"orf19.653"	NA	NaN	NA	NA	""
orf19.6529	"CDC34"	CD36_71730	-0.694268	-0.595378	0.0988908	"Transcription is regulated by Nrg1p and Tup1p, and by Gcn2p and Gcn4p"
orf19.6528	"orf19.6528"	CD36_71740	0.66916	0.13514	-0.534019	""
orf19.6527	"orf19.6527"	CD36_71750	-0.253644	0.159529	0.413172	"Predicted ORF in Assemblies 19, 20 and 21; shows colony morphology-related gene regulation by Ssn6p; transcriptionally activated by Mnl1p under weak acid stress; possibly an essential gene, disruptants not obtained by UAU1 method"
orf19.6526	"orf19.6526"	CD36_71760	1.0153	-1.16429	-2.17958	"S. cerevisiae ortholog RBD2 localizes to COPI-coated vesicle, Golgi apparatus"
orf19.6525	"orf19.6525"	CD36_71770	0.325586	-1.46826	-1.79385	"Predicted ORF in Assemblies 19, 20 and 21; transcriptionally activated by Mnl1p under weak acid stress"
orf19.6524	"TOM40"	CD36_71780	0.836108	-1.57175	-2.40786	"Protein involved in mitochondrial protein import"
orf19.6522	"orf19.6522"	CD36_71800	-0.147207	-0.372494	-0.225287	"Putative allantoate permease; fungal-specific (no human or murine homolog); Gcn4p-regulated"
orf19.6520	"orf19.6520"	CD36_71810	-0.851751	5.33529	6.18704	"Putative allantoate permease; fungal-specific (no human or murine homolog)"
orf19.652	"orf19.652"	CD36_30560	0.410504	0.303978	-0.106526	"S. cerevisiae ortholog YEN1 has crossover junction endodeoxyribonuclease activity, has role in DNA repair and localizes to cytoplasm, nucleus"
orf19.6518	"orf19.6518"	CD36_71830	0.17792	0.271145	0.0932251	""
orf19.6517	"RAD14"	CD36_71840	0.205812	-2.02049	-2.2263	"Transcription is regulated upon yeast-hyphal switch; flucytosine repressed"
orf19.6515	"HSP90"	CD36_71850	0.476549	-1.77209	-2.24864	"Essential chaperone of Hsp90 family, activated by heat shock and stress; regulates several signal transduction pathways; localizes to surface of hyphae, but not yeast-form cells; mediates echinocandin resistance"
orf19.6514	"CUP9"	CD36_71860	0.138631	0.144482	0.00585088	"Protein of unknown function, upregulated in clinical isolates from HIV+ patients with oral candidiasis; transcription reduced upon yeast-hyphal switch; ketoconazole-induced; Plc1p-regulated; shows colony morphology-related Ssn6p regulation"
orf19.6512	"EXO70"	CD36_71870	-0.342099	-1.71864	-1.37655	"Predicted subunit of the exocyst complex, involved in exocytosis; localizes to a crescent on the surface of the hyphal tip; induced during planktonic growth"
orf19.6511	"LIG1"	CD36_71880	0.394273	-2.54757	-2.94184	"tRNA ligase; functional homolog of S. cerevisiae Trl1p; fungal-specific (no human or murine homolog)"
orf19.6510	"GRX1"	CD36_71890	2.09578	2.90241	0.80663	"Protein described as glutaredoxin; transcriptionally regulated by iron; expression greater in low iron"
orf19.651	"LYP1"	CD36_30550	-0.162838	-2.65847	-2.49563	"Predicted ORF in Assemblies 19, 20 and 21; amphotericin B induced; flucytosine repressed; possibly an essential gene, disruptants not obtained by UAU1 method"
orf19.6509	"orf19.6509"	CD36_71900	0.943558	1.95148	1.00793	""
orf19.6508	"orf19.6508"	CD36_71910	0.0307006	-1.8426	-1.8733	"S. cerevisiae ortholog LST7 has protein transporter activity, has role in Golgi to plasma membrane transport, intracellular protein transport and localizes to vesicle coat"
orf19.6507	"orf19.6507"	CD36_71920	1.38203	0.709494	-0.672532	"Predicted ORF in Assemblies 19, 20 and 21; protein detected by mass spec in stationary phase cultures"
orf19.6506	"orf19.6506"	CD36_71930	0.129179	-1.35037	-1.47955	"S. cerevisiae ortholog RCO1 has histone deacetylase activity, has role in regulation of DNA-dependent DNA replication initiation, RNA elongation from RNA polymerase II promoter, histone deacetylation and localizes to Rpd3S complex"
orf19.6503	"orf19.6503"	CD36_71940	1.70896	0.352505	-1.35646	""
orf19.6502	"orf19.6502"	CD36_71950	Inf	Inf	0.368823	"Short-chain dehydrogenase/reductase; upregulation correlates with clinical development of fluconazole resistance"
orf19.6501	"orf19.6501"	CD36_71960	1.2198	-3.37813	-4.59794	""
orf19.6500	"ECM42"	CD36_71970	0.517805	-0.883439	-1.40124	"Putative ornithine acetyltransferase; fungal-specific (no human or murine homolog); Gcn2p-, Gcn4p-regulated; clade-specific gene expression; possibly an essential gene, disruptants not obtained by UAU1 method"
orf19.6499	"orf19.6499"	CD36_71980	0.658593	-0.296298	-0.954892	""
orf19.6498	"orf19.6498"	CD36_71990	0.125546	0.735834	0.610288	"S. cerevisiae ortholog IWR1 has role in general transcription from RNA polymerase II promoter, gene-specific transcription from RNA polymerase II promoter, chromatin remodeling"
orf19.6496	"TRS33"	CD36_72000	0.88481	-0.489434	-1.37424	"Predicted ORF in Assemblies 19, 20 and 21; constitutive expression independent of MTL or white-opaque status"
orf19.6494	"WHI3"	CD36_72010	-0.28124	-0.770306	-0.489067	"Predicted ORF in Assemblies 19, 20 and 21; induced during infection of murine kidney, compared to growth in vitro; has murine homolog"
orf19.6493	"orf19.6493"	CD36_72020	Inf	Inf	5.79513	""
orf19.6492	"orf19.6492"	CD36_72030	-0.0455228	0.72148	0.767003	"S. cerevisiae ortholog FMP48 localizes to mitochondrion"
orf19.6491	"orf19.6491"	NA	-0.851751	NA	NA	""
orf19.649	"orf19.649"	CD36_30530	0.394039	-0.720493	-1.11453	""
orf19.6489	"FMP45"	CD36_72040	-1.68974	-0.546096	1.14364	"Protein induced during the mating process; mutation confers hypersensitivity to toxic ergosterol analog and to amphotericin B; alkaline downregulated; repressed by alpha pheromone in SpiderM medium; possibly essential gene (by UAU1 method)"
orf19.6488	"orf19.6488"	CD36_72050	-2.51472	-3.80535	-1.29063	""
orf19.6487	"orf19.6487"	CD36_72060	NaN	Inf	Inf	""
orf19.6486	"LDG3"	CD36_72070	Inf	Inf	2.35626	"Predicted ORF in Assemblies 19, 20 and 21; induced upon biofilm formation"
orf19.6484	"orf19.6484"	NA	NaN	NA	NA	""
orf19.6482	"orf19.6482"	CD36_72080	1.20714	1.52557	0.318427	"Predicted ORF in Assemblies 19, 20 and 21; induced by nitric oxide in yhb1 mutant"
orf19.6481	"YPS7"	CD36_72090	0.492778	0.657142	0.164364	"Putative aspartic-type endopeptidase with limited ability to degrade alpha pheromone; mutants show increased sensitivity to alpha pheromone"
orf19.6480	"orf19.6480"	CD36_72100	0.576486	-2.67033	-3.24682	"S. cerevisiae ortholog YMD8 has role in UDP-glucose transport and localizes to COPI-coated vesicle"
orf19.6479	"SEC1"	CD36_72110	0.235137	-3.36464	-3.59977	"S. cerevisiae ortholog SEC1 has SNARE binding, has role in vesicle docking involved in exocytosis, vesicle fusion and localizes to plasma membrane, cellular bud neck, cellular bud tip"
orf19.6478	"YCF1"	CD36_72120	-0.146726	-2.57417	-2.42744	"Putative glutathione S-conjugate transporter; MRP/CFTR-subfamily, ABC transporter family; human neutrophil-induced; oxidative stress-induced via Cap1p; possible association with multidrug resistance; possibly an essential gene (UAU1 method)"
orf19.6477	"orf19.6477"	CD36_72130	1.17737	-3.16084	-4.33821	"S. cerevisiae ortholog TRM82 has tRNA (guanine-N7-)-methyltransferase activity, has role in tRNA methylation and localizes to nucleus"
orf19.6476	"orf19.6476"	CD36_72140	-0.382151	-2.46047	-2.07832	"Predicted ORF in Assemblies 19, 20 and 21; filament induced"
orf19.6475	"orf19.6475"	CD36_72150	-0.851751	3.13795	3.9897	""
orf19.6474	"orf19.6474"	CD36_72160	0.0779141	-3.26985	-3.34776	"Membrane-localized protein"
orf19.6472	"CYP1"	CD36_72170	0.906214	0.175631	-0.730584	"Peptidyl-prolyl cis-trans isomerase (PPIase); activity is cyclosporin A sensitive; soluble protein in hyphae; biofilm induced, macrophage-induced protein; downregulated upon treatment of biofilm with farnesol"
orf19.6470	"AHP2"	CD36_72180	0.72181	-1.66931	-2.39112	"Predicted ORF in Assemblies 19, 20 and 21; macrophage-downregulated gene"
orf19.647.3	"orf19.647.3"	NA	-1.58872	NA	NA	""
orf19.6469	"orf19.6469"	CD36_71790	-0.739276	-1.5866	-0.847319	"Predicted ORF in retrotransposon Tca11 with similarity to the Gag-Pol region of retrotransposons, which encodes nucleocapsid-like protein, reverse transcriptase, protease, and integrase"
orf19.6465	"orf19.6465"	NA	0.394409	NA	NA	""
orf19.6464	"orf19.6464"	CD36_72190	0.803669	-1.86975	-2.67342	"Predicted ORF in Assemblies 19, 20 and 21; induced upon adherence to polystyrene; oxidative stress-induced via Cap1p"
orf19.6463	"orf19.6463"	CD36_72200	0.0424811	-1.95998	-2.00246	"Predicted ORF in Assemblies 19, 20 and 21; putative ortholog of S. cerevisiae Yjr072cp; possibly essential for growth (however, depletion mutant is viable)"
orf19.6462	"orf19.6462"	CD36_72210	0.672366	-0.326813	-0.999179	"S. cerevisiae ortholog AIM27 has role in protein folding in endoplasmic reticulum"
orf19.6461	"orf19.6461"	CD36_72220	1.28662	0.189736	-1.09689	"S. cerevisiae ortholog COX20 has unfolded protein binding, has role in mitochondrial respiratory chain complex IV assembly, protein processing, aerobic respiration and localizes to mitochondrial inner membrane"
orf19.6460	"orf19.6460"	CD36_72230	-0.163964	1.3265	1.49047	"S. cerevisiae ortholog PEX1 has ATPase activity, protein heterodimerization activity, has role in protein import into peroxisome matrix, receptor recycling and localizes to peroxisome, membrane fraction, soluble fraction"
orf19.646	"GLN1"	CD36_30510	1.10069	1.10274	0.00204619	"Protein described as similar to glutamate synthase; regulated by Tsa1p, Tsa1Bp under H2O2 stress conditions"
orf19.6459	"DPP3"	CD36_72240	1.28499	-1.00591	-2.2909	"Protein similar to S. cerevisiae pyrophosphate phosphatase Dpp1p; required for farnesol biosynthesis; downregulated in response to 17-beta-estradiol, ethynyl estradiol"
orf19.6458.1	"orf19.6458.1"	CD36_72250	0.042319	1.34218	1.29987	""
orf19.6458	"orf19.6458"	CD36_72260	-0.535176	-1.09233	-0.557152	""
orf19.6457	"orf19.6457"	CD36_72270	0.108721	-5.16778	-5.2765	"Ortholog of S. cerevisiae YBL086C"
orf19.6456	"orf19.6456"	CD36_72280	-0.45258	0.413393	0.865973	""
orf19.6455	"orf19.6455"	CD36_72290	0.796052	-0.276927	-1.07298	"Putative protein of unknown function, transcription is upregulated in clinical isolates from HIV+ patients with oral candidiasis"
orf19.6453	"orf19.6453"	CD36_72300	0.0851075	-3.56357	-3.64868	""
orf19.6452	"RBP1"	CD36_72310	1.24537	2.96138	1.71601	"Peptidyl-prolyl cis-trans isomerase; rapamycin-binding protein; homozygous null mutation confers rapamycin resistance; regulated by Gcn4p; macrophage-induced protein; repressed in response to 3-AT; functional homolog of S. cerevisiae Rbp1p"
orf19.6450	"orf19.6450"	NA	Inf	NA	NA	""
orf19.645.1	"VMA13"	CD36_30500	1.29907	-0.0745775	-1.37365	"Ortholog of S. cerevisiae VMA13"
orf19.6449	"orf19.6449"	CD36_34310	0.420328	-1.11249	-1.53282	""
orf19.6448	"orf19.6448"	CD36_34300	0.230711	-0.883338	-1.11405	""
orf19.6447	"ARF1"	CD36_34290	0.253208	0.77348	0.520272	"ADP-ribosylation factor, probable GTPase involved in intracellular transport; one of several C. albicans ADP-ribosylation factors; N-myristoylprotein; substrate of Nmt1p"
orf19.6445	"ECI1"	CD36_34280	0.798048	-0.559057	-1.35711	"Protein similar to S. cerevisiae Eci1p, which is involved in fatty acid oxidation; transposon mutation affects filamentous growth; expression is regulated upon white-opaque switching"
orf19.6444	"orf19.6444"	CD36_34270	0.172508	-1.1696	-1.34211	"S. cerevisiae ortholog NPR3 has role in cellular response to amino acid starvation, regulation of TOR signaling cascade, meiosis"
orf19.6443	"orf19.6443"	CD36_34260	1.60802	0.569767	-1.03825	""
orf19.6442	"PRP8"	CD36_34250	-0.138849	-1.92743	-1.78858	"Protein similar to S. cerevisiae Prp8p; transcription is repressed in response to alpha pheromone in SpiderM medium"
orf19.6440	"orf19.6440"	CD36_34240	-0.36594	-0.0598802	0.30606	"S. cerevisiae ortholog ASI1 has ubiquitin-protein ligase activity, has role in ubiquitin-dependent protein catabolic process and localizes to endoplasmic reticulum membrane, nuclear inner membrane"
orf19.644	"HGT9"	CD36_30490	3.64132	0.542983	-3.09833	"Putative glucose transporter of the major facilitator superfamily; the C. albicans glucose transporter family comprises 20 members; 12 probable membrane-spanning segments; induced at low (0.2%, compared to 2%) glucose in rich media; intron"
orf19.6438	"orf19.6438"	CD36_34230	0.298132	-1.54975	-1.84789	"S. cerevisiae ortholog LCB1 has serine C-palmitoyltransferase activity, has role in sphingolipid biosynthetic process and localizes to SPOTS complex, microsome"
orf19.6437	"CDC23"	CD36_34220	0.490817	-1.33437	-1.82519	"Similar to anaphase-promoting complex component; possibly transcriptionally regulated by Tac1p"
orf19.6436	"orf19.6436"	CD36_34210	0.567078	-0.388518	-0.955596	""
orf19.6435	"orf19.6435"	CD36_34200	1.61224	-0.593573	-2.20582	"Mitochondrial membrane protein of unknown function"
orf19.6434	"orf19.6434"	CD36_34190	1.06298	2.35695	1.29397	"S. cerevisiae ortholog PEX19 has role in protein stabilization, protein import into peroxisome membrane, ER-dependent peroxisome organization, protein exit from endoplasmic reticulum"
orf19.6432	"orf19.6432"	CD36_34180	0.381246	-0.480946	-0.862191	"S. cerevisiae ortholog AFG2 has ATPase activity, has role in ribosomal large subunit biogenesis, response to drug and localizes to preribosome, large subunit precursor"
orf19.6431	"orf19.6431"	CD36_34170	0.152925	-2.47688	-2.6298	""
orf19.643	"orf19.643"	CD36_30480	-0.417269	-3.13834	-2.72107	""
orf19.6425	"orf19.6425"	CD36_34160	0.111197	-0.918278	-1.02948	"S. cerevisiae ortholog SKI2 has role in nuclear-transcribed mRNA catabolic process, 3'-5' exonucleolytic nonsense-mediated decay, nuclear-transcribed mRNA catabolic process, non-stop decay and localizes to Ski complex"
orf19.6424	"orf19.6424"	CD36_34150	0.538184	-0.387832	-0.926016	"S. cerevisiae ortholog UBC9 has SUMO ligase activity, has role in mitotic spindle elongation, protein sumoylation and localizes to condensed nuclear chromosome"
orf19.6423	"orf19.6423"	CD36_34140	1.18988	2.23707	1.0472	"S. cerevisiae ortholog FBP26 has fructose-2,6-bisphosphate 2-phosphatase activity and has role in glucose metabolic process"
orf19.6422	"SSY5"	CD36_34130	-0.243122	-0.666988	-0.423866	"S. cerevisiae ortholog SSY5 has serine-type endopeptidase activity, has role in response to amino acid stimulus, protein processing and localizes to extrinsic to plasma membrane"
orf19.6420	"PGA13"	CD36_34100	6.47096	6.9332	0.462243	"Putative GPI-anchored protein; described as similar to mucins; induced during cell wall regeneration, and during core caspofungin response; regulated by Tsa1p, Tsa1Bp in minimal media at 37 deg and by Cyr1p, Nrg1p, Tup1p, Rlm1p"
orf19.642	"orf19.642"	CD36_30470	0.399854	0.315901	-0.0839532	"S. cerevisiae ortholog SAP155 has protein serine/threonine phosphatase activity, has role in G1/S transition of mitotic cell cycle and localizes to cytoplasm"
orf19.6419.1	"orf19.6419.1"	NA	0.372497	NA	NA	"Predicted ORF in Assembly 20 and 21; gene has intron"
orf19.6418	"orf19.6418"	CD36_34090	0.491854	-2.77441	-3.26627	"S. cerevisiae ortholog YDL063C has role in ribosomal large subunit biogenesis and localizes to cytoplasm, nucleus"
orf19.6417	"TSR1"	CD36_34080	0.303269	-2.0372	-2.34047	"Putative component of 20S pre-rRNA processing unit; decreased expression in response to prostaglandins"
orf19.6416	"orf19.6416"	CD36_34060	0.555708	-0.952078	-1.50779	""
orf19.6415.1	"orf19.6415.1"	CD36_34070	0.920143	-2.13271	-3.05285	"S. cerevisiae ortholog RPS29A has structural constituent of ribosome and localizes to cytosolic small ribosomal subunit"
orf19.6414.3	"TPM2"	CD36_34050	1.23897	1.4058	0.166829	"Protein described as tropomyosin isoform 2; regulated by Gcn4p; repressed in response to amino acid starvation (3-aminotriazole treatment); macrophage-induced protein; protein level decreased in stationary phase cultures"
orf19.6414	"orf19.6414"	CD36_34040	1.01364	-1.86448	-2.87813	""
orf19.6413	"orf19.6413"	CD36_34030	-0.38039	-0.938662	-0.558272	""
orf19.6411	"orf19.6411"	CD36_34020	0.949366	0.885283	-0.0640831	"Predicted ORF in Assemblies 19, 20 and 21; similar to S. cerevisiae Ylr386wp; transposon mutation affects filamentous growth"
orf19.641	"orf19.641"	CD36_30460	0.855259	0.738782	-0.116477	"S. cerevisiae ortholog ERJ5 has role in protein folding and localizes to endoplasmic reticulum"
orf19.6408	"orf19.6408"	CD36_34010	0.594124	-0.552408	-1.14653	"Predicted ORF in Assemblies 19, 20 and 21; induced during planktonic growth"
orf19.6407	"orf19.6407"	CD36_34000	-0.0266744	-0.869456	-0.842781	"S. cerevisiae ortholog REH1 has role in ribosomal large subunit biogenesis and localizes to cytosolic large ribosomal subunit, cytoplasm, preribosome, large subunit precursor"
orf19.6406	"orf19.6406"	CD36_33990	0.600446	-2.67198	-3.27242	"S. cerevisiae ortholog SWS2 has role in regulation of sporulation resulting in formation of a cellular spore and localizes to cytoplasm"
orf19.6405	"orf19.6405"	CD36_33980	0.389257	-1.13302	-1.52228	"Predicted ORF in Assemblies 19, 20 and 21; decreased transcription is observed in an azole-resistant strain that overexpresses MDR1"
orf19.6404	"GSH2"	CD36_33970	0.686696	0.100459	-0.586237	"Protein described as glutathione synthase; transcriptionally regulated by iron; expression greater in high iron; heavy metal (cadmium) stress-induced"
orf19.6403.1	"RPP2A"	CD36_33950	0.402721	-1.53817	-1.94089	"Conserved acidic ribosomal protein, likely involved in regulation of translation elongation; interacts with Rpp1Bp; one of four similar ribosomal proteins (Rpp1Ap, Rpp1Bp, Rpp2Ap, Rpp2Bp); CUG start codon; upstream uORFs; Tbf1p-activated"
orf19.6403	"orf19.6403"	CD36_33940	0.882822	2.16918	1.28636	"S. cerevisiae ortholog SIL1 has adenyl-nucleotide exchange factor activity, has role in SRP-dependent cotranslational protein targeting to membrane, translocation and localizes to endoplasmic reticulum"
orf19.6402	"CYS3"	CD36_33930	-0.390995	1.07251	1.4635	"Predicted enzyme of sulfur amino acid biosynthesis; upregulated in biofilm; alkaline upregulated; amphotericin B induced; possibly adherence-induced; induced by heavy metal (cadmium) stress, oxidative stress (via Cap1p); Hog1p regulated"
orf19.6400	"orf19.6400"	CD36_33920	0.907241	1.46603	0.558793	"S. cerevisiae ortholog OPI10 has role in inositol metabolic process and localizes to cytoplasm, nucleus"
orf19.640	"orf19.640"	CD36_30450	0.311024	-0.414054	-0.725078	""
orf19.6399	"ATS1"	CD36_33910	0.0199403	-1.14365	-1.16359	"Induced upon adherence to polystyrene"
orf19.6398	"orf19.6398"	CD36_33900	1.20374	4.73597	3.53222	"Predicted ORF in Assemblies 19, 20 and 21; induced by nitric oxide"
orf19.6396	"orf19.6396"	CD36_33890	0.181218	0.649012	0.467794	"Putative patatin-like phospholipase; similar to S. cerevisiae Yml059p, which is predicted to be a membrane protein: antigenic during human oral infection"
orf19.6393	"orf19.6393"	CD36_33880	0.105837	-0.918113	-1.02395	"Predicted ORF in Assemblies 19, 20 and 21; possibly an essential gene, disruptants not obtained by UAU1 method"
orf19.6392	"orf19.6392"	CD36_33870	0.3941	0.61966	0.22556	""
orf19.6391	"orf19.6391"	CD36_33860	0.563286	-0.862753	-1.42604	"Increased transcription is observed in an azole-resistant strain that overexpresses MDR1"
orf19.6390	"orf19.6390"	NA	NaN	NA	NA	""
orf19.639.1	"orf19.639.1"	CD36_30440	0.854518	-0.283988	-1.1385	"S. cerevisiae ortholog MRPL44 has structural constituent of ribosome and localizes to mitochondrial large ribosomal subunit"
orf19.639	"orf19.639"	CD36_30430	1.21951	-0.729776	-1.94928	"Predicted ORF in Assemblies 19, 20 and 21; decreased transcription is observed upon fluphenazine treatment or in an azole-resistant strain that overexpresses CDR1 and CDR2"
orf19.6387	"HSP104"	CD36_33850	0.0138247	-0.709728	-0.723553	"Functional homolog of S. cerevisiae Hsp104p; has chaperone and prion propagation activity in S. cerevisiae; guanidine-insensitive; heat shock/stress induced; downregulated in biofilm upon treatment with farnesol; no human or murine homolog"
orf19.6385	"ACO1"	CD36_33840	0.807936	-0.451633	-1.25957	"Protein described as aconitase; Gcn4p-regulated; amino acid starvation (3-AT treatment), amphotericin B, phagocytosis, farnesol induced; fluconazole-downregulated; expression greater in high iron; antigenic in human or murine infection"
orf19.6382	"orf19.6382"	CD36_33830	0.063605	-2.32355	-2.38715	"Putative MRP/CFTR-subfamily ABC transporter; member of multidrug resistance-associated protein (MRP) subfamily of ABC family; similar to S. cerevisiae Bpt1p"
orf19.638	"FDH1"	CD36_30420	2.54003	0.487399	-2.05263	"Putative formate dehydrogenase, oxidizes formate to produce CO2; Mig1p regulated; induced during macrophage infection; fluconazole-downregulated; downregulated by Efg1p under yeast, not hyphal, growth conditions; predicted to be cytosolic"
orf19.6379	"orf19.6379"	CD36_33820	1.69341	2.30765	0.614241	""
orf19.6378	"TRM9"	CD36_33810	0.781798	-1.85002	-2.63182	"Protein repressed during the mating process"
orf19.6377	"orf19.6377"	CD36_33800	-0.240004	-0.44603	-0.206025	"S. cerevisiae ortholog PPM1 has protein C-terminal leucine carboxyl O-methyltransferase activity and has role in C-terminal protein methylation, cellular protein complex assembly"
orf19.6376	"PTC5"	CD36_33790	0.585824	0.218018	-0.367806	"Putative protein phosphatase of the Type 2C-related family (serine/threonine-specific), similar to S. cerevisiae Ptc5p; mutant shows virulence defect"
orf19.6375	"RPS20"	CD36_33780	0.723349	-2.01148	-2.73483	"Putative ribosomal protein; genes encoding cytoplasmic ribosomal subunits, translation factors, and tRNA synthetases are downregulated upon phagocytosis by murine macrophage; transcription is positively regulated by Tbf1p"
orf19.6374	"orf19.6374"	CD36_33770	0.246653	-1.46212	-1.70878	"S. cerevisiae ortholog ATP10 has unfolded protein binding, has role in mitochondrial proton-transporting ATP synthase complex assembly and localizes to integral to mitochondrial membrane, mitochondrial inner membrane"
orf19.6373	"orf19.6373"	CD36_33760	0.226611	-2.36682	-2.59343	""
orf19.6371	"orf19.6371"	CD36_33750	0.381368	-1.88915	-2.27052	""
orf19.637	"SDH2"	CD36_30410	1.00682	0.984458	-0.0223588	"Succinate dehydrogenase, Fe-S subunit; localizes to surface of yeast-form cells, but not hyphae; transcriptionally regulated by iron; expression greater in high iron; repressed by nitric oxide; induced during log phase (aerobic growth)"
orf19.6369	"RIO2"	CD36_33740	-0.566909	-3.21715	-2.65024	"Predicted ORF in Assemblies 19, 20 and 21; null mutants are hypersensitive to caspofungin"
orf19.6367	"SSB1"	CD36_33730	0.433663	-2.11204	-2.5457	"Putative HSP70 family heat shock protein; mRNA in yeast-form cells, germ tubes; at surface of yeast-form cells, not hyphae; soluble in hyphae; antigenic in human, mouse systemic infection; macrophage, GCN-induced; possibly an essential gene"
orf19.6366	"orf19.6366"	CD36_33720	0.394409	0.972337	0.577927	""
orf19.6365	"PTP1"	CD36_33710	0.213261	-0.662313	-0.875575	"S. cerevisiae ortholog PTP1 has protein tyrosine phosphatase activity, has role in protein dephosphorylation and localizes to mitochondrion"
orf19.6362	"SPA2"	CD36_11800	0.18357	-2.03554	-2.21911	"Protein involved in cell polarity, Spitzenkorper formation; required for mouse virulence; localizes to hyphal tip; has cell-cycle regulated localization in yeast-form cells; functional domains conserved with S. cerevisiae Spa2p"
orf19.6360	"orf19.6360"	CD36_11810	0.951072	-1.35891	-2.30999	"S. cerevisiae ortholog CWC15 has role in nuclear mRNA splicing, via spliceosome and localizes to U2-type spliceosomal complex"
orf19.6359	"orf19.6359"	CD36_11820	1.20009	0.819382	-0.380706	""
orf19.6358	"orf19.6358"	CD36_11830	1.53603	1.60462	0.0685858	"S. cerevisiae ortholog MMS2 has ubiquitin-protein ligase activity and has role in postreplication repair, free ubiquitin chain polymerization, protein polyubiquitination"
orf19.6357	"orf19.6357"	CD36_11840	0.974024	1.50899	0.534966	"S. cerevisiae ortholog MAD1 has role in mitotic cell cycle spindle assembly checkpoint, nucleocytoplasmic transport, mitotic cell cycle G2/M transition decatenation checkpoint and localizes to nuclear pore, kinetochore"
orf19.6356	"orf19.6356"	CD36_11850	0.042416	-1.68312	-1.72553	"S. cerevisiae ortholog PRP6 has role in nuclear mRNA splicing, via spliceosome and localizes to U4/U6 x U5 tri-snRNP complex"
orf19.6355	"orf19.6355"	CD36_11860	1.1902	-2.61028	-3.80048	"S. cerevisiae ortholog RRB1 has role in ribosome biogenesis and localizes to nucleolus"
orf19.6354	"orf19.6354"	CD36_11870	-0.173679	-0.205616	-0.0319364	""
orf19.6353	"orf19.6353"	NA	0.513246	NA	NA	""
orf19.6351	"orf19.6351"	CD36_11880	0.775405	1.07367	0.29826	""
orf19.6350	"orf19.6350"	CD36_11890	0.0900343	3.75286	3.66283	""
orf19.635	"orf19.635"	CD36_30390	Inf	Inf	1.48436	"Predicted ORF in Assemblies 19, 20 and 21; transcription is induced in response to alpha pheromone in SpiderM medium"
orf19.6349	"RVS162"	CD36_11910	-0.678989	2.39607	3.07506	"Protein containing a BAR domain, which is found in proteins involved in membrane curvature; null mutant does not display the endocytic, hyphal growth, virulence, or cell wall defects exhibited by mutants in related genes RVS161 and RVS167"
orf19.6348	"orf19.6348"	CD36_11920	0.489542	-1.94829	-2.43783	"Protein not essential for viability"
orf19.6347	"orf19.6347"	CD36_11930	0.568974	-2.78508	-3.35405	"S. cerevisiae ortholog CDC40 has role in G1/S transition of mitotic cell cycle, nuclear mRNA 3'-splice site recognition, generation of catalytic spliceosome for second transesterification step, nuclear mRNA branch site recognition"
orf19.6346	"orf19.6346"	CD36_11940	0.712981	-0.896069	-1.60905	"Predicted ORF in Assemblies 19, 20 and 21; decreased transcription is observed in an azole-resistant strain that overexpresses MDR1"
orf19.6345	"RPG1A"	CD36_11950	-0.154754	-0.872945	-0.718192	"Putative translation initiation factor; mutation confers hypersensitivity to roridin A and verrucarin A; genes encoding ribosomal subunits, translation factors, and tRNA synthetases are downregulated upon phagocytosis by murine macrophage"
orf19.6344	"RBK1"	NA	0.862144	NA	NA	"S. cerevisiae ortholog RBK1 localizes to cytoplasm, nucleus"
orf19.6343	"orf19.6343"	CD36_11970	-0.0122157	-3.01049	-2.99828	"Predicted ORF in Assemblies 19, 20 and 21; possibly an essential gene, disruptants not obtained by UAU1 method"
orf19.6342	"orf19.6342"	CD36_11980	1.50334	-2.37198	-3.87533	""
orf19.6341	"orf19.6341"	CD36_11990	0.626808	-2.18399	-2.8108	"S. cerevisiae ortholog RIB7 has 5-amino-6-(5-phosphoribosylamino)uracil reductase activity and has role in riboflavin biosynthetic process"
orf19.6340	"orf19.6340"	CD36_12000	0.8333	-1.51049	-2.34379	"S. cerevisiae ortholog RPB5 has DNA-directed RNA polymerase activity and has role in tRNA transcription from RNA polymerase III promoter, transcription from RNA polymerase II promoter, transcription from RNA polymerase I promoter"
orf19.634	"orf19.634"	CD36_30370	5.44837	5.92884	0.480464	""
orf19.6339	"NRG2"	NA	0.563286	NA	NA	"Protein similar to S. cerevisiae Nrg2p transcription factor, which regulates invasive growth in S. cerevisiae; transposon mutation affects filamentous growth"
orf19.6338	"orf19.6338"	NA	-0.936285	NA	NA	""
orf19.6337	"TLO13"	NA	0.143617	NA	NA	"Member of a family of telomere-proximal genes of unknown function; may be spliced in vivo; overlaps orf19.6337.1, which is a region annotated as blocked reading frame"
orf19.6336	"PGA25"	CD36_60170	-0.0349823	-1.4795	-1.44452	"Putative GPI-anchored protein of unknown function; fluconazole-downregulated"
orf19.633	"orf19.633"	CD36_30360	0.521652	0.588225	0.0665736	"Protein described as a putative methyltransferase; decreased expression in hyphae compared to yeast-form cells; expression regulated during planktonic growth"
orf19.6329	"orf19.6329"	CD36_60160	0.282033	-4.20515	-4.48719	"Predicted ORF in Assemblies 19, 20 and 21; opaque-specific transcription; fluconazole-downregulated; greater mRNA abundance in a cyr1 homozygous null mutant than in wild type"
orf19.6328	"orf19.6328"	CD36_60150	0.343522	0.827064	0.483542	"S. cerevisiae ortholog ACN9 has role in regulation of gluconeogenesis, carbon utilization and localizes to mitochondrial intermembrane space"
orf19.6327	"HET1"	CD36_60140	0.743357	-0.101511	-0.844868	"Putative sphingolipid transfer protein involved in localization of glucosylceramide, which is important for virulence"
orf19.6326	"orf19.6326"	CD36_60130	1.17907	-1.88702	-3.06609	""
orf19.6325.1	"orf19.6325.1"	NA	0.539039	NA	NA	"S. cerevisiae ortholog YNL211C localizes to mitochondrion"
orf19.6324	"VID27"	CD36_60120	0.196947	-0.906647	-1.10359	"Protein similar to S. cerevisiae Vid27p; transposon mutation affects filamentous growth; mutation confers hypersensitivity to toxic ergosterol analog; fungal-specific (no human or murine homolog)"
orf19.6323	"HPA2"	CD36_60110	2.02028	2.54977	0.529494	"S. cerevisiae ortholog HPA3 has D-amino-acid N-acetyltransferase activity, has role in D-amino acid metabolic process and localizes to cytoplasm, nucleus"
orf19.6322	"ARD"	CD36_60100	1.85858	1.48668	-0.371901	"D-arabitol dehydrogenase, NAD-dependent (ArDH); enzyme of D-arabitol and D-arabinose catabolism; D-arabitol is a marker for active infection in humans; has conserved YXXXK motif of short-chain alcohol-polyol-sugar dehydrogenases"
orf19.6321	"PGA48"	NA	-0.1807	NA	NA	"Putative GPI-anchored protein of unknown function; similar to S. cerevisiae Spi1p, which is induced at stationary phase; transcriptionally regulated by iron; expression greater in high iron"
orf19.6319	"orf19.6319"	CD36_60090	-0.132039	-0.255504	-0.123465	"S. cerevisiae ortholog UBP3 has ubiquitin-specific protease activity and has role in protein deubiquitination, regulation of ER to Golgi vesicle-mediated transport, ribophagy"
orf19.6318	"orf19.6318"	CD36_30100	1.38346	-0.556892	-1.94036	"S. cerevisiae ortholog YJR085C localizes to mitochondrion"
orf19.6317	"ADE6"	CD36_30110	0.187871	-1.01021	-1.19808	"Enzyme of adenine biosynthesis; not induced during GCN response, in contrast to the S. cerevisiae ortholog; protein detected by mass spec in stationary phase cultures"
orf19.6316.4	"orf19.6316.4"	CD36_30120	0.971371	0.53787	-0.433501	"S. cerevisiae ortholog YLR363W-A localizes to nucleus"
orf19.6316	"orf19.6316"	CD36_30130	0.279907	1.55266	1.27275	"Predicted membrane transporter, member of the L-amino acid transporter-3 (LAT3) family, major facilitator superfamily (MFS)"
orf19.6315	"orf19.6315"	CD36_30140	6.4881	8.2862	1.7981	""
orf19.6314	"RPB8"	CD36_30150	0.685546	-2.0303	-2.71585	"Protein described as a subunit of RNA polymerases I, II, and III; regulated by Gcn4p; repressed in response to amino acid starvation (3-aminotriazole treatment); heterozygous null mutant exhibits resistance to parnafungin"
orf19.6313.2	"MVB12"	CD36_30160	0.267085	-0.533445	-0.80053	"Putative ESCRT-I complex subunit with a role in multivesicular body (MVB) trafficking; mutant displays growth defect on alkaline medium"
orf19.6313	"MNT4"	CD36_30170	-0.97149	-3.20656	-2.23507	"Transcriptionally regulated by iron; expression greater in low iron; similar to mannosyltransferases"
orf19.6312	"RPS3"	CD36_30190	0.846162	-1.29365	-2.13981	"Putative ribosomal protein; Hog1p-induced; genes encoding cytoplasmic ribosomal subunits, translation factors, and tRNA synthetases are downregulated upon phagocytosis by murine macrophage"
orf19.6311	"orf19.6311"	CD36_30200	-0.620345	-0.933909	-0.313564	""
orf19.6310	"orf19.6310"	CD36_30210	0.433406	0.295255	-0.138151	""
orf19.6309	"MSS11"	CD36_30220	-0.287219	0.848755	1.13597	"Transcriptional activator, binds to Flo8p via a LisH motif to cooperatively activate transcription of hyphal-specific genes; required for hyphal growth"
orf19.6308	"orf19.6308"	NA	0.620317	NA	NA	""
orf19.6307	"orf19.6307"	CD36_30250	-1.39489	0.0915723	1.48647	""
orf19.6306	"orf19.6306"	CD36_30260	2.31843	3.50136	1.18294	"Trimethylaminobutyraldehyde dehydrogenase, the third enzyme of the carnitine biosynthesis pathway"
orf19.6305	"orf19.6305"	CD36_30270	1.73837	4.1432	2.40483	"Hydroxytrimethyllysine aldolase, the second enzyme in the carnitine biosynthesis pathway"
orf19.6304	"LYS5"	CD36_30280	-0.977282	-1.90481	-0.927534	"Phosphopantetheinyl transferase; enzyme of lysine biosynthesis; modifies, and thereby activates, Lys2p alpha-aminoadipate reductase; functional homolog of S. cerevisiae Lys5p"
orf19.6302	"PGA39"	CD36_30290	-Inf	2.83156	Inf	"Putative GPI-anchored protein of unknown function"
orf19.6298	"SPB4"	CD36_50760	-0.324128	-2.24742	-1.92329	"Predicted ORF in Assemblies 19, 20 and 21; flucytosine repressed"
orf19.6297	"orf19.6297"	CD36_50750	1.10742	-1.54947	-2.65689	"S. cerevisiae ortholog DEG1 has pseudouridine synthase activity, has role in tRNA pseudouridine synthesis and localizes to cytoplasm, nucleus"
orf19.6296	"VPS22"	CD36_50740	0.509887	-1.14435	-1.65423	"Putative ESCRT-II complex protein with a role in multivesicular body (MVB) trafficking"
orf19.6295	"MAS2"	CD36_51660	0.488884	-1.72107	-2.20996	"Predicted ORF in Assemblies 19, 20 and 21; protein level decreased in stationary phase cultures"
orf19.6294	"MYO1"	CD36_51650	1.55871	1.76545	0.206741	"Component of actomyosin ring at neck of newly-emerged bud"
orf19.6293	"EMP24"	CD36_33220	1.34434	1.1639	-0.180442	"COPII-coated vesicle component"
orf19.6291	"orf19.6291"	CD36_33230	0.166823	-1.57047	-1.73729	"S. cerevisiae ortholog FUN30 has role in chromatin silencing at silent mating-type cassette, chromatin silencing at rDNA, chromosome organization, chromatin silencing at telomere"
orf19.6288	"orf19.6288"	NA	1.14825	NA	NA	""
orf19.6287	"AAT21"	CD36_33240	1.00775	2.49663	1.48888	"Protein detected by mass spec in exponential and stationary phase cultures; Gcn4p-regulated"
orf19.6286.2	"RPS27"	CD36_33250	0.264614	-2.7929	-3.05751	"Putative ribosomal protein; genes encoding cytoplasmic ribosomal subunits, translation factors, and tRNA synthetases are downregulated upon phagocytosis by murine macrophage"
orf19.6286	"orf19.6286"	CD36_33260	-0.1146	-2.41828	-2.30368	"Ortholog of S. cerevisiae YER128W"
orf19.6285	"GLC7"	CD36_33270	0.510651	-0.18447	-0.695121	"Putative serine/threonine phosphatase; transcriptionally regulated by iron; expression greater in high iron; alternatively spliced intron in 5' UTR; possibly an essential gene, disruptants not obtained by UAU1 method"
orf19.6284	"orf19.6284"	CD36_33290	0.0896008	-2.66062	-2.75022	"S. cerevisiae ortholog SRP102 has signal recognition particle binding, GTP binding, has role in protein targeting to ER and localizes to integral to endoplasmic reticulum membrane"
orf19.6283	"orf19.6283"	CD36_33310	0.631818	-1.85031	-2.48212	""
orf19.6282	"orf19.6282"	CD36_33320	1.02272	3.80234	2.77962	""
orf19.6280	"orf19.6280"	NA	NaN	NA	NA	""
orf19.6277	"orf19.6277"	CD36_05920	1.21864	0.550629	-0.668009	""
orf19.6276	"orf19.6276"	CD36_05930	-0.140581	1.15374	1.29432	""
orf19.6275	"orf19.6275"	CD36_05940	0.98189	3.8427	2.86081	"S. cerevisiae ortholog YBR028C localizes to cytoplasm"
orf19.6274	"PBR1"	CD36_05950	Inf	NaN	-Inf	"Protein required for cohesion, adhesion, and biofilm formation; induced by alpha pheromone in white cells"
orf19.6273	"orf19.6273"	CD36_05960	0.536616	-3.06178	-3.5984	""
orf19.6272	"orf19.6272"	CD36_05970	0.763082	1.7123	0.949219	"Predicted ORF in Assemblies 19, 20 and 21; regulated by Gcn2p and Gcn4p"
orf19.6271	"orf19.6271"	CD36_05980	-0.340806	-2.30526	-1.96446	""
orf19.6269	"orf19.6269"	CD36_05990	-0.180875	-2.58344	-2.40257	""
orf19.6268	"orf19.6268"	CD36_06000	0.460001	0.427275	-0.0327261	"Predicted ORF in Assemblies 19, 20 and 21; decreased expression observed in an ssr1 homozygous null mutant"
orf19.6267	"orf19.6267"	CD36_06020	-0.0543269	2.36613	2.42046	"Protein not essential for viability"
orf19.6266	"orf19.6266"	CD36_06030	0.524723	-2.91955	-3.44428	""
orf19.6265.1	"RPS14B"	CD36_06040	-0.046295	-2.02023	-1.97394	"Putative ribosomal protein; genes encoding cytoplasmic ribosomal subunits, translation factors, and tRNA synthetases are downregulated upon phagocytosis by murine macrophage; transcription is positively regulated by Tbf1p"
orf19.6265	"RPS22A"	CD36_03380	0.688319	-2.65512	-3.34344	"Predicted ribosomal protein; genes encoding cytoplasmic ribosomal subunits, translation factors, and tRNA synthetases are downregulated upon phagocytosis by murine macrophage"
orf19.6265	"RPS22A"	CD36_06050	0.688319	-3.351	-4.03932	"Predicted ribosomal protein; genes encoding cytoplasmic ribosomal subunits, translation factors, and tRNA synthetases are downregulated upon phagocytosis by murine macrophage"
orf19.6264.4	"orf19.6264.4"	CD36_06060	0.110174	-2.04106	-2.15123	"Ortholog of S. cerevisiae RPL39"
orf19.6264.3	"orf19.6264.3"	CD36_06070	1.03398	0.844563	-0.189417	"S. cerevisiae ortholog YIP3 has role in ER to Golgi vesicle-mediated transport and localizes to ER to Golgi transport vesicle, endoplasmic reticulum, Golgi apparatus"
orf19.6264	"orf19.6264"	CD36_06080	1.32513	1.14485	-0.180279	""
orf19.6263	"orf19.6263"	CD36_06090	0.559725	-1.45732	-2.01705	"Predicted membrane transporter, member of the monocarboxylate porter (MCP) family, major facilitator superfamily (MFS)"
orf19.6261	"BPH1"	CD36_06100	-0.336282	-1.28254	-0.94626	"Protein not essential for viability; similar to S. cerevisiae Bph1p, which is a putative ortholog of human Chediak-Higashi syndrome protein and murine beige gene implicated in disease syndromes involving defective lysosomal trafficking"
orf19.6260	"orf19.6260"	CD36_06110	-0.0876749	-1.467	-1.37933	"S. cerevisiae ortholog UBP12 localizes to cytoplasm, nucleus"
orf19.6259	"orf19.6259"	CD36_06120	0.968178	0.426133	-0.542045	"Ortholog of S. cerevisiae RRP43"
orf19.6257	"GLT1"	CD36_06130	0.279429	-0.0885111	-0.36794	"Putative glutamate synthase; alkaline downregulated; transcription is downregulated in both intermediate and mature biofilms"
orf19.6255	"orf19.6255"	CD36_06150	0.119661	-2.8964	-3.01606	"S. cerevisiae ortholog YGR117C localizes to cytoplasm"
orf19.6254	"ANT1"	CD36_06160	0.583897	2.02762	1.44372	"S. cerevisiae ortholog ANT1 has adenine nucleotide transmembrane transporter activity, has role in peroxisome organization, ATP transport, fatty acid beta-oxidation and localizes to integral to peroxisomal membrane"
orf19.6253	"RPS23A"	CD36_06170	0.232377	-2.45281	-2.68519	"Putative ribosomal protein; genes encoding cytoplasmic ribosomal subunits, translation factors, and tRNA synthetases are downregulated upon phagocytosis by murine macrophage"
orf19.6252	"orf19.6252"	CD36_06180	0.470862	-0.912835	-1.3837	"S. cerevisiae ortholog SPN1 has RNA polymerase II transcription elongation factor activity, has role in RNA elongation from RNA polymerase II promoter and localizes to transcription elongation factor complex"
orf19.6250	"orf19.6250"	CD36_06190	-0.34025	-0.678974	-0.338725	""
orf19.6249	"HAK1"	CD36_06200	-0.769289	6.61057	7.37986	"Putative potassium transporter; similar to Schwanniomyces occidentalis Hak1p; amphotericin B induced; transcriptionally induced upon phagocytosis by macrophage"
orf19.6248	"orf19.6248"	CD36_06210	-4.52418	-1.37284	3.15134	""
orf19.6247	"orf19.6247"	CD36_06220	0.804159	-0.796619	-1.60078	"S. cerevisiae ortholog CTF4 has chromatin binding and has role in DNA-dependent DNA replication, mitotic sister chromatid cohesion, replicative cell aging, double-strand break repair via break-induced replication"
orf19.6246	"orf19.6246"	CD36_06230	0.156405	-2.49864	-2.65505	"S. cerevisiae ortholog NAT3 has peptide alpha-N-acetyltransferase activity, has role in N-terminal peptidyl-methionine acetylation, cytoskeleton organization, mitochondrion inheritance and localizes to NatB complex"
orf19.6245	"orf19.6245"	CD36_06240	-0.551999	-0.601659	-0.0496601	"Predicted ORF in Assemblies 19, 20 and 21; regulated by osmotic stress (via Hog1p) and oxidative stress (Hog1p- and Cap1p-independent); transcription is induced in response to alpha pheromone in SpiderM medium"
orf19.6244	"orf19.6244"	CD36_06250	0.491174	-0.782525	-1.2737	""
orf19.6243	"VPS34"	CD36_06260	-0.0292674	-1.80741	-1.77814	"Autophosphorylated class III phosphatidylinositol 3-kinase, required for normal vesicle transport, hyphal growth, fibroblast adherence, virulence in mouse systemic infection; growth-regulated; caspofungin and hydrogen peroxide sensitivity"
orf19.6242	"CYK3"	NA	4.9556	NA	NA	"Essential protein involved in cytokinesis; contains an SH3 domain"
orf19.6240	"orf19.6240"	CD36_06270	1.89384	-2.02728	-3.92112	"S. cerevisiae ortholog CYK3 has role in cytokinesis and localizes to cellular bud neck, cytoplasm"
orf19.6239	"orf19.6239"	CD36_06280	1.09392	0.553836	-0.540086	"Predicted ORF in Assemblies 19, 20 and 21; possibly an essential gene, disruptants not obtained by UAU1 method"
orf19.6238	"orf19.6238"	CD36_06290	0.897064	0.762577	-0.134488	""
orf19.6237	"RAC1"	CD36_06300	0.510658	0.561203	0.0505447	"G-protein of RAC subfamily; required for embedded filamentous growth, not for serum-induced hyphal growth; dynamic localization at plasma membrane and nucleus; similar to, but not interchangeable with, Cdc42p; lacks S. cerevisiae homolog"
orf19.6236	"orf19.6236"	CD36_06310	0.666151	-0.707694	-1.37384	"S. cerevisiae ortholog NOP6 has role in ribosomal small subunit biogenesis and localizes to nucleolus"
orf19.6235	"orf19.6235"	CD36_06320	0.818887	-0.371249	-1.19014	""
orf19.6234	"orf19.6234"	CD36_06330	1.07674	-1.54191	-2.61865	"Predicted ORF in Assemblies 19, 20 and 21; mutation confers hypersensitivity to 5-fluorocytosine (5-FC), 5-fluorouracil (5-FU), and tubercidin (7-deazaadenosine)"
orf19.6233	"orf19.6233"	CD36_06340	0.930032	-0.12791	-1.05794	"S. cerevisiae ortholog YNL181W localizes to endoplasmic reticulum, nuclear envelope"
orf19.6232	"NPR1"	CD36_06350	1.14628	-0.316138	-1.46242	"Predicted ORF in Assemblies 19, 20 and 21; induced in core stress response"
orf19.6231	"MRPL19"	CD36_06360	1.21796	-0.00395596	-1.22191	"Protein described as a ribosomal protein; induced upon adherence to polystyrene"
orf19.6230	"orf19.6230"	CD36_06370	1.21594	-3.81547	-5.03141	"Ortholog of S. cerevisiae RAI1"
orf19.6229	"CAT1"	CD36_06380	0.385872	-0.484354	-0.870226	"Catalase; role in resistance to oxidative stress, neutrophils, peroxide; role in murine systemic virulence; regulated by iron, ciclopirox olamine, fluconazole, growth, carbon source, pH, Rim101p, Ssn6p, Hog1p, farnesol, core stress response"
orf19.6227	"orf19.6227"	CD36_06390	0.481396	-0.237947	-0.719343	""
orf19.6225.1	"orf19.6225.1"	NA	0.0292516	NA	NA	"S. cerevisiae ortholog PET117 has role in mitochondrial respiratory chain complex IV assembly and localizes to mitochondrion"
orf19.6225	"PCL7"	CD36_06410	-0.164029	-0.526657	-0.362628	"Protein described as cyclin-like, possible Pho85p cyclin; hyphal downregulated; transcriptionally activated by Mnl1p under weak acid stress"
orf19.6224	"orf19.6224"	CD36_06420	0.97892	0.345073	-0.633847	""
orf19.6222.1	"orf19.6222.1"	NA	-0.410924	NA	NA	""
orf19.6222	"SPO22"	CD36_06430	-1.17368	1.76754	2.94122	"S. cerevisiae ortholog SPO22 has role in synaptonemal complex assembly and localizes to condensed nuclear chromosome"
orf19.6220.4	"orf19.6220.4"	NA	0.779641	NA	NA	"Ortholog of S. cerevisiae RPL34B"
orf19.6220.3	"MMD1"	NA	0.517888	NA	NA	"ORF Predicted by Annotation Working Group; macrophage-downregulated protein abundance"
orf19.6220	"orf19.6220"	CD36_06460	-0.0209903	-1.53386	-1.51287	"S. cerevisiae ortholog CAF130 has role in regulation of transcription from RNA polymerase II promoter and localizes to CCR4-NOT core complex"
orf19.6219	"orf19.6219"	CD36_06470	1.52676	1.96484	0.438084	""
orf19.6217	"PGA63"	CD36_06480	1.64887	0.733912	-0.914953	"S. cerevisiae ortholog SEC31 has structural molecule activity, has role in COPII-coated vesicle budding and localizes to COPII vesicle coat, mating projection tip"
orf19.6214	"ATC1"	CD36_06490	-0.589531	-0.564264	0.025267	"Cell wall acid trehalase; catalyzes hydrolysis of the disaccharide trehalose; similar to S. cerevisiae vacuolar acid trehalase (Ath1p)"
orf19.6213	"SUI2"	CD36_06510	0.519911	-0.139119	-0.65903	"Putative translation initiation factor; genes encoding ribosomal subunits, translation factors, and tRNA synthetases are downregulated upon phagocytosis by murine macrophage; protein detected by mass spec in stationary phase cultures"
orf19.6211	"orf19.6211"	CD36_06520	0.208912	-3.14378	-3.35269	""
orf19.6209	"orf19.6209"	CD36_06530	0.576459	-0.194393	-0.770852	"Predicted membrane transporter, member of the monocarboxylate porter (MCP) family, major facilitator superfamily (MFS); possibly an essential gene, disruptants not obtained by UAU1 method"
orf19.6208	"MEF2"	CD36_06540	0.438438	-2.28692	-2.72536	"Predicted ORF in Assemblies 19, 20 and 21; caspofungin induced"
orf19.6205	"orf19.6205"	CD36_06550	0.951448	-0.991609	-1.94306	""
orf19.6203	"PUT3"	CD36_06560	0.140052	-2.07049	-2.21054	"Predicted zinc-finger protein of unknown function; has similarity to S. cerevisiae Put3p, which is a transcription factor involved in the regulation of proline utilization genes"
orf19.6202	"RBT4"	CD36_06570	1.18142	0.289243	-0.892172	"Protein with similarity to plant pathogenesis-related proteins; required for virulence in mouse systemic and rabbit corneal infections; not required for filamentation; mRNA binds to She3p and is localized to hyphal tips"
orf19.6200	"orf19.6200"	CD36_06580	-Inf	1.87397	Inf	""
orf19.6199	"orf19.6199"	CD36_06590	-0.0335376	-1.11372	-1.08018	"S. cerevisiae ortholog HCS1 has ATP-dependent 5'-3' DNA helicase activity and localizes to DNA helicase A complex, alpha DNA polymerase:primase complex"
orf19.6198.1	"orf19.6198.1"	NA	0.265712	NA	NA	"Predicted ORF in Assemblies 19, 20 and 21; gene has intron; gene was predicted by Annotation Working Group (AWG), subsequently removed from Assembly 20 by the AWG, and later reinstated (see Locus History)"
orf19.6197	"orf19.6197"	CD36_06610	-0.297162	-0.447818	-0.150655	"Ortholog of S. cerevisiae DHH1"
orf19.6196	"orf19.6196"	CD36_06620	0.276256	-0.367484	-0.64374	""
orf19.6195	"orf19.6195"	CD36_06630	0.774866	-0.906043	-1.68091	""
orf19.6194	"orf19.6194"	CD36_06640	0.380695	2.02274	1.64205	"Protein not essential for viability"
orf19.6193	"TAF145"	CD36_06650	-0.857488	-1.68895	-0.831459	"Protein likely to be essential for growth, based on an insertional mutagenesis strategy; similar to S. cerevisiae Taf145p, which is a component of RNA polymerase II transcription factor TFIID; flucytosine repressed"
orf19.6192	"orf19.6192"	NA	0.532962	NA	NA	"Predicted ORF in Assemblies 19, 20 and 21; Plc1p-regulated; transcription detected in high-resolution tiling array experiments"
orf19.6191	"TLO8"	NA	Inf	NA	NA	"Member of a family of telomere-proximal genes of unknown function; may be spliced in vivo"
orf19.6190	"SRB1"	CD36_87780	1.23491	-0.0650446	-1.29996	"Essential GDP-mannose pyrophosphorylase; synthesizes GDP-mannose for protein glycosylation; functional homolog of S. cerevisiae Psa1p; at surface of yeast-form, not hyphal, cells; alkaline upregulated; induced on adherence to polystyrene"
orf19.6189	"orf19.6189"	CD36_87770	0.242225	0.597028	0.354803	"S. cerevisiae ortholog AIM18 localizes to mitochondrion"
orf19.6188	"orf19.6188"	NA	-2.43671	NA	NA	""
orf19.6187	"orf19.6187"	CD36_87760	-0.130433	-0.440032	-0.309599	"Predicted ORF in Assemblies 19, 20 and 21; overlaps orf19.6185 and orf19.6188"
orf19.6186	"orf19.6186"	CD36_87750	0.758682	-0.776611	-1.53529	"Predicted ORF in Assemblies 19, 20 and 21; overlaps orf19.6185"
orf19.6185	"orf19.6185"	NA	0.885215	NA	NA	"Protein not essential for viability; overlaps orf19.6186 and orf19.6187"
orf19.6184	"orf19.6184"	CD36_87730	2.53291	2.99779	0.464877	""
orf19.6183	"orf19.6183"	CD36_87740	0.924941	0.402093	-0.522848	"S. cerevisiae ortholog TIM8 has protein transporter activity, has role in protein import into mitochondrial inner membrane and localizes to mitochondrial intermembrane space protein transporter complex"
orf19.6182	"ZCF34"	CD36_87720	0.312265	-0.351449	-0.663714	"Putative transcription factor with zinc cluster DNA-binding motif; null mutant displays fluconazole sensitivity"
orf19.6181	"orf19.6181"	NA	NaN	NA	NA	""
orf19.6180	"orf19.6180"	CD36_87710	0.538764	-0.784041	-1.32281	"Protein similar to Pichia anomala YDL054c and S. cerevisiae Ydl054cp; transmembrane regions predicted"
orf19.6179	"orf19.6179"	NA	NaN	NA	NA	"ORF Predicted by Annotation Working Group; overlaps FBP1/orf19.6178"
orf19.6178	"FBP1"	CD36_87700	0.42132	0.838271	0.416951	"Fructose-1,6-bisphosphatase, key gluconeogenesis enzyme; involved in carbohydrate metabolism; regulated by Efg1p, Ssn6p; upregulated upon phagocytosis, effecting switch from glycolysis to gluconeogenesis in macrophage; overlaps orf19.6179"
orf19.6177	"orf19.6177"	CD36_87690	0.061418	-2.80085	-2.86227	""
orf19.6176	"SEC61"	CD36_87680	1.81128	2.67208	0.860797	"ER protein-translocation complex subunit; essential; similar to S. cerevisiae Sec61p; 10 transmembrane regions predicted; chimeric mutant partially functionally complements S. cerevisiae sec61 defects"
orf19.6175	"orf19.6175"	CD36_87670	0.761608	-1.34593	-2.10754	"Predicted ORF in Assemblies 19, 20 and 21; decreased expression in response to prostaglandins"
orf19.6173	"STD1"	CD36_87660	0.225728	1.16249	0.936765	"Protein described as transcription factor involved in control of glucose-regulated gene expression; repressed by Rgt1p"
orf19.6171	"orf19.6171"	CD36_87650	0.540224	-0.408366	-0.94859	""
orf19.6170	"orf19.6170"	CD36_87640	0.37669	1.50243	1.12574	"S. cerevisiae ortholog BIK1 has microtubule binding and has role in mitotic spindle elongation, karyogamy involved in conjugation with cellular fusion, nuclear migration involved in conjugation with cellular fusion"
orf19.6169	"orf19.6169"	CD36_80840	1.20154	3.94098	2.73945	"Predicted ORF in Assemblies 19, 20 and 21; induced by Rgt1p"
orf19.6168	"orf19.6168"	CD36_80830	0.122649	-2.41323	-2.53588	""
orf19.6167	"AYR1"	CD36_80820	1.40449	2.25684	0.852341	"Protein described as putative oxidoreductase; transcriptionally induced by interaction with macrophage"
orf19.6166	"orf19.6166"	CD36_80810	0.182867	-1.56732	-1.75019	""
orf19.6165	"KGD1"	CD36_80800	1.07988	-0.53939	-1.61927	"Protein described as 2-oxoglutarate dehydrogenase; regulated by Efg1p under yeast-form but not hyphal growth conditions; transcription is upregulated in an RHE model of oral candidiasis; detected by mass spec in stationary phase cultures"
orf19.6164	"orf19.6164"	NA	Inf	NA	NA	""
orf19.6163	"CSE4"	CD36_80790	2.33432	-1.60091	-3.93523	"Centromere-associated protein; essential; 4 Cse4p-containing nucleosomes, each containing 2 Cse4p molecules, bind to each centromere; similar to CENP-A (centromeric histone H3 variant) proteins; Cse4p and Mif2p colocalize at centromeres"
orf19.6160	"orf19.6160"	CD36_80780	0.563719	-1.66897	-2.23269	"S. cerevisiae ortholog YMR031C localizes to membrane raft, mitochondrion"
orf19.6156	"orf19.6156"	CD36_80770	0.753688	-1.9321	-2.68579	"Ortholog of S. cerevisiae AIM11"
orf19.6155	"orf19.6155"	CD36_80760	0.755732	-3.0173	-3.77303	"S. cerevisiae ortholog CDC9 has DNA ligase (ATP) activity and has role in base-excision repair, DNA recombination, mitotic cell cycle, lagging strand elongation, nucleotide-excision repair, DNA ligation"
orf19.6152	"orf19.6152"	CD36_32830	0.427618	-1.9362	-2.36382	""
orf19.6151	"ARC15"	CD36_32840	1.01599	0.246908	-0.769078	"Predicted ORF in Assemblies 19, 20 and 21; mutation confers hypersensitivity to cytochalasin D"
orf19.6148	"orf19.6148"	CD36_32850	2.33995	2.6468	0.306852	""
orf19.6147	"orf19.6147"	CD36_32860	-0.293353	-1.09884	-0.80549	""
orf19.6146	"CLG1"	CD36_32870	1.23172	2.7709	1.53919	"Transcription is regulated upon yeast-hyphal switch"
orf19.6143	"orf19.6143"	CD36_32890	-0.0110502	-1.64465	-1.6336	""
orf19.6142	"orf19.6142"	CD36_32900	2.47018	0.243857	-2.22632	""
orf19.6141	"HGT16"	CD36_32910	0.983897	-0.647549	-1.63144	"Putative glucose transporter of the major facilitator superfamily; the C. albicans glucose transporter family comprises 20 members; 12 probable membrane-spanning segments; gene has intron; expressed in rich medium with 2% glucose"
orf19.6140	"FRE30"	NA	0.680744	NA	NA	"Protein with similarity to ferric reductases; downregulated in response to amphotericin B, estradiol, or ciclopirox olamine, and upregulated by interaction with macrophage; un-merged from orf19.6139 in a revision of Assembly 21"
orf19.6139	"FRE7"	CD36_32920	0.0570137	1.34531	1.2883	"Protein similar to ferric reductase Fre10p; transcription is downregulated in response to treatment with ciclopirox olamine or 17-beta-estradiol; transcriptionally induced by alkaline conditions or interaction with macrophage"
orf19.6138	"orf19.6138"	CD36_32930	1.26373	7.30486	6.04113	"Predicted ORF in Assemblies 19, 20 and 21; similar to ferric reductase Fre10p; possibly an essential gene, disruptants not obtained by UAU1 method"
orf19.6137	"orf19.6137"	CD36_32940	0.83874	-0.226979	-1.06572	""
orf19.6136	"orf19.6136"	CD36_32950	1.0585	-2.01696	-3.07545	"Predicted ORF in Assemblies 19, 20 and 21; repressed by nitric oxide"
orf19.6135.1	"SMX4"	CD36_32960	0.196126	-0.50437	-0.700495	"Putative component of heteroheptameric complexes (Lsm1p, Lsm8p) involved in RNA processing and decay; flucytosine induced"
orf19.6135	"orf19.6135"	CD36_32970	0.742342	-2.07642	-2.81876	""
orf19.6134	"orf19.6134"	CD36_32980	0.264894	0.212972	-0.0519218	""
orf19.6133	"PIF1"	CD36_32990	-0.191718	-2.69401	-2.5023	"Decreased transcription is observed upon fluphenazine treatment"
orf19.6132	"orf19.6132"	CD36_33000	0.926874	-0.526359	-1.45323	""
orf19.6131	"KSR1"	CD36_33010	0.667623	0.455599	-0.212024	"3-ketosphinganine reductase, catalyzes the second step in phytosphingosine synthesis"
orf19.6129	"MRPL8"	CD36_33020	1.26835	-1.5651	-2.83345	"Predicted ribosomal protein of the mitochondrial 60S subunit"
orf19.6127	"LPD1"	CD36_33030	0.770474	0.0507039	-0.719771	"Putative dihydrolipoamide dehydrogenase; soluble protein in hyphae; antigenic during human oral infection and murine systemic infection; macrophage-induced protein"
orf19.6126	"KGD2"	CD36_33050	0.888405	1.56998	0.681572	"Protein described as dihydrolipoamide S-succinyltransferase; transcriptionally regulated by iron; expression greater in high iron"
orf19.6124	"ACE2"	CD36_33060	-0.714951	-1.82531	-1.11035	"Putative transcription factor involved in regulation of morphogenesis; required for wild-type cell separation, adherence, biofilm formation, and virulence in mouse; mutant is hyperfilamentous; similar to S. cerevisiae Ace2p and Swi5p"
orf19.6121	"MNL1"	CD36_33070	-0.108568	-0.596409	-0.48784	"Transcription factor that activates transcription of stress response genes via SLE (STRE-like) elements, required for adaptation to weak acid stress; activates a subset of the genes that are repressed by Nrg1p"
orf19.612	"orf19.612"	CD36_33550	1.1094	-0.545765	-1.65516	""
orf19.6119	"orf19.6119"	CD36_33080	1.69044	-0.0488618	-1.7393	""
orf19.6118	"orf19.6118"	CD36_33090	2.28911	1.30657	-0.982542	"Putative protein of unknown function, transcription is positively regulated by Tbf1p"
orf19.6117	"orf19.6117"	CD36_33100	1.05102	-3.23765	-4.28866	"Predicted ORF in Assemblies 19, 20 and 21; ketoconazole and hypoxia induced"
orf19.6116	"GLK4"	CD36_33110	0.310939	-2.53052	-2.84146	"Protein described as a glucokinase; decreased expression in hyphae compared to yeast-form cells"
orf19.6115	"orf19.6115"	NA	0.375659	NA	NA	""
orf19.6114	"orf19.6114"	NA	0.241715	NA	NA	"Predicted ORF in Assemblies 19, 20 and 21; transcription detected in high-resolution tiling array experiments"
orf19.6113	"orf19.6113"	NA	-2.0033	NA	NA	"Predicted ORF in Assemblies 19, 20 and 21; transcription detected in high-resolution tiling array experiments"
orf19.6112	"CTA2"	NA	0.279035	NA	NA	"Putative transcriptional activator, activates transcription in 1-hybrid assay in S. cerevisiae; downregulated by Efg1p; member of a family of telomere-proximal genes; transcription is positively regulated by Tbf1p"
orf19.6110	"orf19.6110"	NA	1.99625	NA	NA	""
orf19.6109	"TUP1"	NA	0.913854	NA	NA	"Transcriptional corepressor; represses filamentous growth, regulates phase switching, roles in germ tube induction, farnesol response; has C-terminal WD40 repeats; farnesol upregulated in biofilm; in repression pathways with Nrg1p, Rfg1p"
orf19.6105	"MVD"	NA	1.23204	NA	NA	"Mevalonate diphosphate decarboxylase; functional homolog of S. cerevisiae Erg19p; possible drug target; transcriptionally regulated by carbon source, yeast-hyphal switch, growth phase, antifungals; gene has intron"
orf19.6103	"orf19.6103"	CD36_00100	-0.1819	-0.853017	-0.671117	"S. cerevisiae ortholog SPO73 has role in ascospore wall assembly and localizes to cytosol"
orf19.6102	"orf19.6102"	CD36_00090	-0.0693505	0.107671	0.177022	"Putative protein of unknown function; null mutant is viable but slow-growing and displays abnormal colony morphology and invasive growth"
orf19.6100	"orf19.6100"	CD36_00110	0.441884	0.136176	-0.305708	"Protein not essential for viability; similar to S. cerevisiae Crd1p, which is cardiolipin synthase; transcription is upregulated in clinical isolates from HIV+ patients with oral candidiasis"
orf19.610	"EFG1"	CD36_33560	-0.450298	-0.806741	-0.356443	"Transcriptional repressor; required for white-phase cell type; hyphal growth, metabolism, cell-wall gene regulator; roles in adhesion, virulence; Cph1p and Efg1p have role in host cytokine response; bHLH; binds E-box; T206 phosphorylated"
orf19.6099	"CCT8"	CD36_00120	0.985692	-0.615284	-1.60098	"Essential protein similar to chaperonin complex subunit 8; involved in hyphal morphogenesis, particularly starvation-induced; production in S. cerevisiae inhibits Ras2p-mediated pathways (including pseudohyphal); CCT1 and TRP1 genes overlap"
orf19.6096	"TRP1"	CD36_00130	-0.348872	-2.20715	-1.85827	"Phosphoribosylanthranilate isomerase; enzyme of tryptophan biosynthesis; expected to be unifunctional, unlike trifunctional enzyme of some other fungi; complements E. coli trpC or S. cerevisiae trp1 mutant; CCT1 and TRP1 genes overlap"
orf19.6094	"orf19.6094"	CD36_00140	-0.0883085	-0.817605	-0.729297	"S. cerevisiae ortholog VPS53 has role in retrograde transport, endosome to Golgi, Golgi to vacuole transport and localizes to GARP complex"
orf19.6092	"KEL1"	CD36_00150	0.320364	-1.09598	-1.41634	"Protein containing a Kelch repeat domain, similar to S. cerevisiae Kel1p; not required for adherence to buccal epithelial cells or virulence in mouse systemic infection; null mutant colonies exhibit slightly decreased filamentation ratio"
orf19.6091	"RIM8"	CD36_00160	-1.15925	-4.30741	-3.14816	"Protein involved in the pH response pathway; required for activation of the transcription factor Rim101p and for alkaline pH-induced hyphal growth; shows colony morphology-related gene regulation by Ssn6p"
orf19.6090	"orf19.6090"	CD36_00170	0.0795731	-3.82377	-3.90335	"Predicted ORF in Assemblies 19, 20 and 21; repressed by nitric oxide"
orf19.609	"orf19.609"	NA	Inf	NA	NA	"Predicted ORF in Assemblies 19, 20 and 21; transcription is specific to white cell type"
orf19.6086	"LEU4"	CD36_00180	-0.284237	1.02663	1.31087	"Putative 2-isopropylmalalate synthase; regulated by Nrg1p, Mig1p, Tup1p, Gcn4p; upregulated in the presence of human whole blood or polymorphonuclear (PMN) cells; macrophage/pseudohyphal-repressed after 16h; fungal-specific"
orf19.6085	"RPL16A"	CD36_00190	0.489488	-1.23007	-1.71956	"Protein similar to S. cerevisiae ribosomal protein Rpl16Ap; transposon mutation affects filamentous growth; genes encoding cytoplasmic ribosomal subunits are downregulated upon phagocytosis by murine macrophage"
orf19.6084	"orf19.6084"	CD36_00200	1.07323	1.96443	0.891196	""
orf19.6083	"orf19.6083"	NA	1.61006	NA	NA	""
orf19.6082	"orf19.6082"	CD36_00210	0.482866	0.983385	0.500519	"S. cerevisiae ortholog GSF2 has unfolded protein binding, has role in protein folding, protein localization at cell surface and localizes to mitochondrial outer membrane, integral to endoplasmic reticulum membrane"
orf19.6081	"PHR2"	NA	0.643756	NA	NA	"Glycosidase; role in cell wall structure; may act on beta-1,3-glucan prior to beta-1,6-glucan linkage; role in vaginal but not systemic virulence (low pH, not neutral); low pH, high iron, fluconazole induced; Rim101p-downregulated at pH 8"
orf19.6080	"orf19.6080"	CD36_00240	0.281067	-1.71091	-1.99198	""
orf19.6079	"orf19.6079"	NA	-1.85175	NA	NA	"Predicted ORF in retrotransposon Tca8 with similarity to the Gag region encoding nucleocapsid-like protein; transcription is downregulated in response to ciclopirox olamine; filament induced; regulated by Rfg1p, Tup1p; overlaps orf19.6078.1"
orf19.6078.1	"RFC52"	NA	NaN	NA	NA	"ORF Predicted by Annotation Working Group; periodic mRNA expression, peak at cell-cycle G1/S phase; overlaps orf19.6079"
orf19.6078	"POL93"	NA	-1.95742	NA	NA	"Predicted ORF in retrotransposon Tca8 with similarity to the Pol region of retrotransposons encoding reverse transcriptase, protease and integrase; downregulated in response to ciclopirox olamine; induced upon biofilm formation"
orf19.6077	"orf19.6077"	CD36_00250	0.332519	-2.56898	-2.9015	"Predicted ORF in Assemblies 19, 20 and 21; shows colony morphology-related gene regulation by Ssn6p"
orf19.6076	"orf19.6076"	CD36_00260	0.62328	1.16393	0.540655	"S. cerevisiae ortholog VPS29 has protein transporter activity, has role in retrograde transport, endosome to Golgi and localizes to endosome, retromer complex, inner shell"
orf19.6075	"orf19.6075"	CD36_00270	1.22659	1.78462	0.558026	"Ortholog of S. cerevisiae CDC36"
orf19.6074	"HBR1"	CD36_00280	0.247563	-2.3615	-2.60906	"Essential protein involved in regulation of MTL gene expression; hemoglobin-regulated inhibitor of white-opaque switching, which may affect survival in host; activator of MTLalpha1 and MTLalpha2; transcription is activated by hemoglobin"
orf19.6073	"HMX1"	CD36_00290	3.03671	2.93447	-0.102245	"Heme oxygenase; acts in utilization of hemin iron; gene transcriptionally activated by heat, low iron, or hemin; negatively regulated by Efg1p; expression greater in low iron; upregulated by Rim101p at pH 8"
orf19.6072	"CDC13"	CD36_00300	0.133142	-0.819211	-0.952353	"Essential protein with similarity to S. cerevisiae Cdc13p, which is involved in telomere maintenance"
orf19.6071	"orf19.6071"	CD36_00310	0.410427	-0.547928	-0.958355	"S. cerevisiae ortholog MDM20 has peptide alpha-N-acetyltransferase activity, has role in N-terminal peptidyl-methionine acetylation, cytoskeleton organization, mitochondrion inheritance and localizes to NatB complex"
orf19.6070	"ENA2"	CD36_00320	-0.849114	-1.04667	-0.197553	"Putative sodium transporter; transcription upregulated in response to ciclopirox olamine; alkaline upregulated by Rim101p; repressed upon high-level peroxide stress; upregulated in oral candidiasis clinical isolates; possibly essential gene"
orf19.607	"orf19.607"	CD36_33570	-0.146025	-0.628704	-0.482679	"S. cerevisiae ortholog RAD26 has DNA-dependent ATPase activity, has role in transcription-coupled nucleotide-excision repair and localizes to cytoplasm, nucleus"
orf19.6068	"SVF1"	CD36_00330	0.795086	0.146087	-0.648999	"Predicted ORF in Assemblies 19, 20 and 21; fluconazole-induced; regulated by Gcn4p; repressed in response to amino acid starvation (3-aminotriazole treatment); fungal-specific (no human or murine homolog)"
orf19.6066	"orf19.6066"	CD36_00340	1.3282	-0.952096	-2.2803	"S. cerevisiae ortholog HFD1 localizes to endosome, lipid particle, integral to mitochondrial outer membrane"
orf19.6065	"orf19.6065"	CD36_00350	1.18539	-0.586486	-1.77188	"Gene transcription regulated by Mig1p and Tup1p; amphotericin B, caspofungin repressed; protein detected by mass spec in exponential and stationary phase cultures"
orf19.6064	"orf19.6064"	CD36_00360	0.894892	-0.00610675	-0.900999	"S. cerevisiae ortholog ATG18 has phosphoinositide binding and has role in vacuolar protein processing, CVT pathway, macroautophagy, peroxisome degradation, piecemeal microautophagy of nucleus, late endosome to vacuole transport"
orf19.6063	"UBP6"	CD36_00370	1.05636	2.40216	1.3458	"Predicted ORF in Assemblies 19, 20 and 21; oxidative stress-induced via Cap1p"
orf19.6062.3	"orf19.6062.3"	NA	1.29589	NA	NA	"S. cerevisiae ortholog AIM13 localizes to mitochondrion"
orf19.6062	"orf19.6062"	CD36_00390	0.677987	0.275374	-0.402613	"Membrane-localized protein"
orf19.6061	"orf19.6061"	CD36_00400	1.65599	0.538212	-1.11777	"S. cerevisiae ortholog FMP30 has role in N-acylethanolamine metabolic process, N-acylphosphatidylethanolamine metabolic process and localizes to mitochondrion"
orf19.6060	"GCN20"	CD36_00410	0.340364	-0.47655	-0.816914	"YEF3-subfamily ABC family protein, predicted not to be a transporter"
orf19.606	"orf19.606"	CD36_33580	0.453167	-0.551592	-1.00476	"Ortholog of S. cerevisiae YLR352W"
orf19.6059	"TTR1"	CD36_00420	0.313046	0.887675	0.574629	"Putative glutaredoxin; described as a glutathione reductase; upregulated in the presence of human neutrophils, and upon benomyl treatment; alkaline downregulated; regulated by Gcn2p and Gcn4p; required for virulence in mouse model"
orf19.6058	"GLO1"	CD36_00430	0.990596	0.865222	-0.125375	"Predicted ORF in Assemblies 19, 20 and 21; oxidative stress-induced via Cap1p"
orf19.6057	"orf19.6057"	CD36_00440	0.566314	-1.39031	-1.95662	"S. cerevisiae ortholog ECM31 has 3-methyl-2-oxobutanoate hydroxymethyltransferase activity, has role in pantothenate biosynthetic process and localizes to mitochondrion"
orf19.6056	"orf19.6056"	CD36_00450	1.19738	1.88101	0.683637	"S. cerevisiae ortholog YOR283W has phosphatase activity, has role in dephosphorylation and localizes to cytoplasm, nucleus"
orf19.6055	"orf19.6055"	CD36_00460	0.355844	-1.46827	-1.82411	""
orf19.6054	"orf19.6054"	CD36_00470	-0.0635694	-1.99183	-1.92826	"Predicted ORF in Assemblies 19, 20 and 21; decreased transcription is observed in an azole-resistant strain that overexpresses MDR1"
orf19.6053	"CIS2"	CD36_00480	0.355236	1.64006	1.28482	"Putative role in regulation of biogenesis of the cell wall; upregulated in biofilm; Gcn4p-regulated"
orf19.6052	"CNS1"	CD36_00490	0.673141	-2.3146	-2.98774	"Predicted ORF in Assemblies 19, 20 and 21; mutation confers hypersensitivity to radicicol"
orf19.605	"orf19.605"	NA	0.678764	NA	NA	""
orf19.6049	"orf19.6049"	CD36_00500	0.477557	-0.270737	-0.748293	""
orf19.6048	"orf19.6048"	CD36_00510	0.181368	0.627856	0.446488	""
orf19.6047	"TUF1"	CD36_00520	0.709252	-1.26175	-1.971	"Putative translation elongation factor; macrophage/pseudohyphal-induced; genes encoding ribosomal subunits, translation factors, and tRNA synthetases are downregulated upon phagocytosis by murine macrophage"
orf19.6046	"APC1"	CD36_00530	-0.0622248	-0.768445	-0.70622	"Predicted ORF in Assemblies 19, 20 and 21; essential for growth; periodic mRNA expression, peak at cell-cycle S/G2 phase"
orf19.6045	"orf19.6045"	CD36_00540	0.490826	-1.28178	-1.7726	"Putative phosphatidylserine decarboxylase involved in phosphatidylethanolamine biosynthesis"
orf19.6044	"MOB2"	CD36_00550	1.11598	-1.69633	-2.81231	"Mob1/phocein domain protein of RAM signaling network of cell wall integrity; role in cell separation, cortical actin polarization; required for hyphal growth; interacts with Cbk1p; mRNA binds to She3p"
orf19.6043	"orf19.6043"	CD36_00560	0.659851	-0.180887	-0.840738	""
orf19.6041	"RPO41"	CD36_00570	0.43494	-2.33347	-2.76841	"Predicted ORF in Assemblies 19, 20 and 21; downregulated during core stress response"
orf19.6040	"SNF7"	CD36_00580	0.278405	-0.165585	-0.44399	"Protein involved in echinocandin, azole sensitivity; role in proteolytic activation of Rim101p; separable roles in RIM101 pathway and in transport from MVB to vacuole; similar to S. cerevisiae Snf7p component of ESCRT III complex"
orf19.604	"orf19.604"	CD36_33600	0.336263	-1.32146	-1.65773	""
orf19.6039	"orf19.6039"	CD36_00590	1.11227	2.56624	1.45397	"S. cerevisiae ortholog SED5 has SNAP receptor activity and has role in vesicle fusion with Golgi apparatus, intra-Golgi vesicle-mediated transport, ER to Golgi vesicle-mediated transport"
orf19.6038	"UGA32"	CD36_00600	0.156408	-1.89133	-2.04774	"Predicted zinc-finger protein of unknown function; has similarity to S. cerevisiae Uga3p, which is a transcription factor involved in the regulation of gamma-aminobutyrate metabolism genes"
orf19.6037	"ASM3"	CD36_00610	0.134105	-3.71554	-3.84964	"Putative secreted acid sphingomyelin phosphodiesterase; induced upon biofilm formation; possible Kex2p substrate; increased transcription is observed in an azole-resistant strain that overexpresses MDR1"
orf19.6036	"RIC1"	CD36_00620	0.787659	-0.617204	-1.40486	"Protein not essential for viability; similar to S. cerevisiae Ric1p, which is a guanyl-nucleotide exchange factor"
orf19.6035	"orf19.6035"	CD36_00630	1.13837	2.24049	1.10212	"Predicted ORF in Assemblies 19, 20 and 21; repressed by nitric oxide"
orf19.6034	"TUB2"	NA	1.7983	NA	NA	"Beta-tubulin; functional homolog of ScTub2p; hyphal-induced; fluconazole-induced; gene has two introns; overproduction causes inviability in S. cerevisiae; slow growth, increased white-to opaque switching in ectopic expression strains"
orf19.6033	"CMP1"	CD36_00650	0.669718	-0.412751	-1.08247	"Catalytic subunit of calcineurin (Ca[2+]-calmodulin-regulated S/T protein phosphatase); required for wild-type virulence, resistance to high pH, Na(+), Li(+), Mn(2+), and fluconazole tolerance; micafungin is fungicidal to null mutant"
orf19.6032	"SPE1"	CD36_00660	0.406782	0.670126	0.263344	"Ornithine decarboxylase; enzyme of polyamine biosynthesis; not essential for viability; functionally complements polyamine auxotrophy of S. cerevisiae spe1 mutant; upregulated in biofilm; downregulated upon adherence to polystyrene"
orf19.6031	"VPS27"	CD36_00670	0.343945	0.382425	0.0384804	"Putative ESCRT-0 complex protein with a role in multivesicular body (MVB) trafficking"
orf19.6030	"orf19.6030"	NA	0.590138	NA	NA	"Predicted ORF in Assemblies 19, 20 and 21; transcription detected in high-resolution tiling array experiments"
orf19.603	"IMP4"	CD36_33610	0.549413	-2.57107	-3.12048	"Predicted ORF in Assemblies 19, 20 and 21; decreased expression in response to prostaglandins"
orf19.6029	"ROT1"	CD36_00680	0.163516	-0.848447	-1.01196	"Similar to S. cerevisiae Rot1p, which is involved in cell wall 1,6-beta-glucan biosynthesis; has predicted transmembrane region; possibly an essential gene, disruptants not obtained by UAU1 method"
orf19.6028	"HGC1"	CD36_00690	-0.671067	-0.750662	-0.079595	"Hypha-specific G1 cyclin-related protein involved in regulation of hyphal morphogenesis; Cdc28p-Hgc1p maintains Cdc11p S394 phosphorylation during hyphal growth; required for virulence in mouse model; regulated by Nrg1p, Tup1p, farnesol"
orf19.6027	"orf19.6027"	CD36_00740	0.370969	-1.2089	-1.57987	""
orf19.6026	"ERG2"	NA	0.762442	NA	NA	"C-8 sterol isomerase; enzyme of ergosterol biosynthesis pathway; converts fecosterol to episterol; mutant is hypersensitive to multiple drugs; ketoconazole-induced"
orf19.6025	"orf19.6025"	CD36_00760	0.189276	0.546731	0.357455	"S. cerevisiae ortholog ALG13 has N-acetylglucosaminyldiphosphodolichol N-acetylglucosaminyltransferase activity and has role in dolichol-linked oligosaccharide biosynthetic process"
orf19.6024	"orf19.6024"	CD36_00770	0.64782	0.951057	0.303237	""
orf19.6023	"orf19.6023"	CD36_00780	1.93724	0.0438564	-1.89339	""
orf19.6022	"orf19.6022"	CD36_00790	4.05514	5.44871	1.39357	"Predicted ORF in Assemblies 19, 20 and 21; downregulated during core stress response"
orf19.6021	"IHD2"	CD36_00800	2.12668	-2.1297	-4.25638	"Transcriptionally regulated by iron and by yeast-hyphal switching; expression greater in low iron"
orf19.6020	"orf19.6020"	CD36_00810	0.364795	-0.733481	-1.09828	"S. cerevisiae ortholog ATG3 has Atg8 ligase activity, has role in piecemeal microautophagy of nucleus, CVT pathway, C-terminal protein lipidation, mitochondrion degradation, autophagic vacuole assembly and localizes to cytosol"
orf19.6018	"LRO1"	CD36_00820	-0.457784	-1.61911	-1.16132	"S. cerevisiae ortholog LRO1 has phospholipid:diacylglycerol acyltransferase activity and has role in lipid storage, triglyceride biosynthetic process"
orf19.6017	"orf19.6017"	CD36_00830	-0.237976	-2.94611	-2.70814	""
orf19.6016	"orf19.6016"	CD36_00840	0.330087	0.237161	-0.0929263	"S. cerevisiae ortholog GEM1 has GTPase activity, has role in vesicle-mediated transport, mitochondrion inheritance and localizes to mitochondrial outer membrane"
orf19.6014	"RRS1"	CD36_00850	0.404992	-3.26077	-3.66576	"Predicted ORF in Assemblies 19, 20 and 21; mutation confers hypersensitivity to 5-fluorocytosine (5-FC), 5-fluorouracil (5-FU), and tubercidin (7-deazaadenosine)"
orf19.6013	"orf19.6013"	CD36_00860	1.39263	0.856867	-0.535767	"S. cerevisiae ortholog TRI1 localizes to cytoplasm, nucleolus"
orf19.6012	"orf19.6012"	CD36_00870	0.788798	1.53236	0.743564	"S. cerevisiae ortholog YOR296W localizes to cytoplasm"
orf19.6011	"SIN3"	CD36_00880	0.527012	-1.1193	-1.64631	"Protein similar to S. cerevisiae Sin3p (transcriptional corepressor involved in histone deacetylase recruitment); has paired amphipathic helix PAH1 domain; interacts with ScOpi1p, not CaOpi1p; transposon mutation affects filamentous growth"
orf19.6010.1	"RPB11"	NA	1.10781	NA	NA	"ORF Predicted by Annotation Working Group; flucytosine induced"
orf19.6010	"CDC5"	CD36_00900	2.68591	-0.749248	-3.43515	"Polo-like kinase; member of conserved Mcm1p regulon; depletion causes defects in spindle elongation and Cdc35p-dependent filamentation; virulence-group-correlated expression; likely an essential gene; disruptants not obtained by UAU1 method"
orf19.6009	"SET1"	CD36_00910	-0.115756	-0.635018	-0.519263	"Lysine histone methyltransferase; methylates K4 of histone H3; has a role in regulation of white-opaque switching, epithelial cell adhesion, agar-embedded filamentation, and virulence in mouse; unique N-terminus is immunogenic in human"
orf19.6008.4	"orf19.6008.4"	NA	1.23352	NA	NA	""
orf19.6008.3	"orf19.6008.3"	NA	0.551605	NA	NA	""
orf19.6008	"orf19.6008"	CD36_85270	0.590182	-3.18899	-3.77917	"Predicted ORF in Assemblies 19, 20 and 21; transcription is repressed in response to alpha pheromone in SpiderM medium"
orf19.6007	"orf19.6007"	CD36_85260	2.04378	1.07326	-0.970519	"Predicted ORF in Assemblies 19, 20 and 21; decreased expression in response to prostaglandins"
orf19.6005	"HGT5"	CD36_85250	0.118028	2.03986	1.92183	"Putative glucose transporter of the major facilitator superfamily; the C. albicans glucose transporter family comprises 20 members; 12 probable membrane-spanning segments, extended N terminus; expressed in rich medium with 2% glucose"
orf19.6003	"orf19.6003"	CD36_85240	1.50927	1.62642	0.117145	""
orf19.6002	"RPL8B"	CD36_85230	1.53414	-1.30285	-2.83698	"Predicted ribosomal protein; transcription is regulated upon yeast-hyphal switch; genes encoding cytoplasmic ribosomal subunits, translation factors, and tRNA synthetases are downregulated upon phagocytosis by murine macrophage"
orf19.6001	"SAP3"	CD36_85220	-1.45266	-2.33149	-0.878831	"Secreted aspartyl proteinase, acts in utilization of protein as nitrogen source; assessment of virulence role complicated by URA3 effects; regulated by growth phase; produced by opaque phase cells; alpha-pheromone repressed"
orf19.6000	"CDR1"	CD36_85210	-0.750873	-3.5379	-2.78702	"Multidrug transporter of ATP-binding cassette (ABC) superfamily; transports phospholipids in an in-to-out direction; transcription induced by beta-estradiol, progesterone, corticosteroid, or cholesterol"
orf19.600	"TRK1"	CD36_33620	-0.24441	-3.33475	-3.09034	"Potassium transporter; mediates K+ and Cl- influx; role in sensitivity to cationic antimicrobial peptides, not by direct uptake, possibly related to membrane permeability; fungal-specific (no human or murine homolog); contains 5' UTR intron"
orf19.5999	"DYN1"	CD36_85190	-0.235053	-1.13284	-0.897788	"Dynein heavy chain; dynein is a motor protein that moves toward the microtubule minus end; required for wild-type yeast-form cell separation, spindle positioning, nuclear migration, hyphal growth; transcription is regulated by Mig1p"
orf19.5996.1	"RPS19A"	CD36_85180	0.568591	-1.91883	-2.48742	"Putative ribosomal protein; protein level decreased in stationary phase cultures"
orf19.5995	"MCA1"	CD36_85170	1.06417	0.17337	-0.890802	"Putative cysteine protease with similarity to S. cerevisiae Mca1p; has a role in apoptotic cell death upon H2O2 treatment; fungal-specific (no human or murine homolog); farnesol-induced"
orf19.5994	"RHB1"	CD36_85160	1.4882	-0.642922	-2.13112	"Putative small G protein from the Ras superfamily involved in cell wall integrity and control of filamentous growth under nitrogen starvation"
orf19.5992	"WOR2"	CD36_85150	0.738789	-1.30741	-2.0462	"Transcriptional regulator of white-opaque switching; required for maintenance of opaque state"
orf19.5991	"orf19.5991"	CD36_85130	0.105764	-1.23368	-1.33944	"S. cerevisiae ortholog DBP10 has role in ribosomal large subunit assembly and localizes to nucleolus"
orf19.599	"orf19.599"	NA	-Inf	NA	NA	""
orf19.5989	"orf19.5989"	CD36_85120	0.418931	-0.210982	-0.629913	""
orf19.5987	"orf19.5987"	CD36_85110	0.30014	-1.69381	-1.99395	"S. cerevisiae ortholog TRM11 has tRNA (guanine-N2-)-methyltransferase activity, has role in tRNA methylation and localizes to cytoplasm"
orf19.5986	"THI4"	CD36_85100	-1.8012	-2.32085	-0.51965	"Protein repressed during the mating process; fungal-specific (no human or murine homolog); protein detected by mass spec in stationary phase cultures"
orf19.5985	"orf19.5985"	CD36_85090	0.498423	-0.37759	-0.876014	"S. cerevisiae ortholog PAC10 has tubulin binding, has role in tubulin complex assembly and localizes to prefoldin complex"
orf19.5984	"orf19.5984"	CD36_85080	0.140691	-1.26839	-1.40909	"Putative protein of unknown function; homozygous transposon insertion causes decreased colony wrinkling under filamentous growth-inducing conditions, but does not block true hyphal formation in liquid media"
orf19.5982	"RPL18"	CD36_85070	0.423847	-1.88861	-2.31245	"Predicted ribosomal protein; Plc1p-regulated, Tbf1p-activated; genes encoding cytoplasmic ribosomal subunits, translation factors, and tRNA synthetases are downregulated upon phagocytosis by murine macrophage"
orf19.5980	"orf19.5980"	CD36_85060	0.291444	-0.00649738	-0.297941	""
orf19.598	"orf19.598"	NA	NaN	NA	NA	""
orf19.5978	"orf19.5978"	CD36_85050	0.116188	2.0059	1.88972	""
orf19.5977	"CEM1"	CD36_85040	0.311882	-1.53427	-1.84615	"Protein likely to be essential for growth, based on an insertional mutagenesis strategy; similar to S. cerevisiae Cem1p, which is an acyl carrier protein involved in fatty acid biosynthesis"
orf19.5976	"orf19.5976"	CD36_85030	0.610921	1.92799	1.31706	"Predicted ORF in Assemblies 19, 20 and 21; decreased transcription is observed upon fluphenazine treatment, in azole-resistant strains that overexpress CDR1 and CDR2 or MDR1"
orf19.5975	"orf19.5975"	CD36_85020	-0.648311	-1.85723	-1.20892	"Putative transcription factor with zinc finger DNA-binding motif; fluconazole-downregulated; expression regulated during planktonic growth; increased expression observed in an ssr1 homozygous null mutant"
orf19.5974	"ATG9"	CD36_85010	0.220885	-3.35717	-3.57805	"Protein similar to S. cerevisiae Atg9p, required for an early step in autophagy; required for cytoplasm to vacuole trafficking of Lap41p"
orf19.5973	"PHB2"	CD36_85000	1.15839	-0.00245158	-1.16084	"Prohibitin 2; plasma membrane localized"
orf19.5971	"orf19.5971"	CD36_84990	0.322016	0.793768	0.471752	"Ortholog of S. cerevisiae MTC6"
orf19.5970	"orf19.5970"	CD36_84980	0.833047	1.2438	0.410752	"Protein described as a DNA repair helicase; transcriptionally induced by interaction with macrophage; fungal-specific (no human or murine homolog)"
orf19.597	"orf19.597"	CD36_33630	0.212271	-1.39274	-1.60501	"Predicted ORF in Assemblies 19, 20 and 21; Gcn4p-regulated"
orf19.5968	"RDI1"	CD36_84970	0.810751	-0.0839729	-0.894724	"Protein similar to S. cerevisiae Rdi1p, an inhibitor of Rho-GDP dissociation; transposon mutation affects filamentous growth; farnesol-, filament-induced; regulated by Nrg1p, Tup1p"
orf19.5967	"FGR44"	CD36_84960	0.64596	0.785884	0.139923	"Protein lacking an ortholog in S. cerevisiae; transposon mutation affects filamentous growth"
orf19.5966	"orf19.5966"	NA	NaN	NA	NA	""
orf19.5965	"orf19.5965"	CD36_84950	0.148886	-0.416381	-0.565266	"S. cerevisiae ortholog UFD2 has ubiquitin-ubiquitin ligase activity, has role in ubiquitin-dependent protein catabolic process, response to stress, protein ubiquitination and localizes to cytoplasm, nucleus"
orf19.5964.2	"RPL35"	CD36_84940	0.816062	-0.95296	-1.76902	"Protein described as a ribosomal protein; downregulation correlates with clinical development of fluconazole resistance; shows colony morphology-related gene regulation by Ssn6p"
orf19.5964	"ARF2"	CD36_84920	0.983396	0.448597	-0.534799	"Predicted ORF in Assemblies 19, 20 and 21; mutation confers hypersensitivity to Brefeldin A"
orf19.5963	"orf19.5963"	CD36_84910	0.227413	-0.672255	-0.899668	"S. cerevisiae ortholog NUS1 has role in protein glycosylation and localizes to endoplasmic reticulum, lipid particle, nuclear envelope"
orf19.5962	"HGT4"	CD36_84900	0.00748883	-1.26784	-1.27533	"Glucose and galactose sensor; fermentation, filamentation, virulence roles; in 20-member C. albicans glucose transporter family, extended C terminus; high-glucose repressed; induced in macrophage, repressed in biofilm"
orf19.5961	"orf19.5961"	CD36_84890	-0.020928	-2.49794	-2.47701	"S. cerevisiae ortholog NAS6 has role in proteolysis, proteasome regulatory particle assembly and localizes to proteasome regulatory particle, nucleus, cytosol"
orf19.5960	"NCE102"	CD36_84880	0.431456	-3.1029	-3.53435	"Protein involved in non classical protein export; localized to plasma membrane"
orf19.596.2	"orf19.596.2"	NA	0.269644	NA	NA	"S. cerevisiae ortholog DAD4 has role in mitotic spindle organization in nucleus, mitosis, regulation of microtubule polymerization or depolymerization and localizes to DASH complex, spindle"
orf19.596.1	"NOP10"	CD36_33650	0.399649	-2.37228	-2.77193	"ORF Predicted by Annotation Working Group; flucytosine induced"
orf19.5959	"NOP14"	CD36_84870	-0.26787	-2.55924	-2.29137	"Predicted ORF in Assemblies 19, 20 and 21; mutation confers resistance to 5-fluorocytosine (5-FC), 5-fluorouracil (5-FU), and tubercidin (7-deazaadenosine); heterozygous null mutant exhibits resistance to parnafungin"
orf19.5958	"CDR2"	CD36_84860	0.253742	3.45034	3.1966	"Multidrug transporter, ATP-binding cassette (ABC) superfamily; transports phospholipids, in-to-out direction; low mRNA level; overexpressed in azole-resistant isolates; expression confers multidrug resistance to S. cerevisiae pdr5 mutant"
orf19.5956	"PIN3"	CD36_84850	0.997318	0.69483	-0.302488	"Putative SH3-domain-containing protein"
orf19.5954	"orf19.5954"	CD36_84840	-2.02168	-4.25038	-2.2287	"S. cerevisiae ortholog AMA1 has enzyme activator activity, has role in meiosis I, ascospore wall assembly, protein catabolic process and localizes to anaphase-promoting complex"
orf19.5953	"orf19.5953"	CD36_84830	0.0707552	-3.59935	-3.6701	"Predicted ORF in Assemblies 19, 20 and 21; possibly an essential gene, disruptants not obtained by UAU1 method"
orf19.5952	"orf19.5952"	CD36_84810	0.0643477	-1.32603	-1.39038	"Predicted ORF in Assemblies 19, 20 and 21; induced by nitric oxide in yhb1 null mutant"
orf19.5949	"FAS2"	CD36_84800	0.388625	1.94111	1.55248	"Alpha subunit of fatty-acid synthase; required for virulence in mouse systemic infection and rat oropharyngeal infection models; regulated by Efg1p; fluconazole-induced; amphotericin B repressed"
orf19.5947	"SEC7"	CD36_84790	0.373673	-1.10129	-1.47497	"Predicted ORF in Assemblies 19, 20 and 21; mutation confers hypersensitivity to Brefeldin A; caspofungin repressed"
orf19.5943.1	"orf19.5943.1"	CD36_84780	0.650572	-0.853605	-1.50418	"Putative protein of unknown function, transcription is upregulated in an RHE model of oral candidiasis"
orf19.5943	"orf19.5943"	CD36_84760	0.52415	0.272036	-0.252114	"S. cerevisiae ortholog PEX28 has role in peroxisome organization and localizes to peroxisomal membrane"
orf19.5942	"orf19.5942"	CD36_84750	-0.127842	0.0763425	0.204184	"Protein described as a zinc finger protein similar to S. cerevisiae Itt1p; downregulated upon adherence to polystyrene"
orf19.5941	"orf19.5941"	CD36_84740	0.843958	0.621166	-0.222793	"S. cerevisiae ortholog ERV41 has role in ER to Golgi vesicle-mediated transport and localizes to integral to Golgi membrane, ER to Golgi transport vesicle, integral to endoplasmic reticulum membrane"
orf19.5940	"ZCF32"	CD36_84730	-0.20707	-2.85988	-2.65281	"Predicted zinc-finger protein of unknown function; possibly an essential gene, disruptants not obtained by UAU1 method"
orf19.5938	"SEN1"	CD36_84720	-0.00357426	-1.51025	-1.50668	"Predicted ORF in Assemblies 19, 20 and 21; decreased expression in response to prostaglandins"
orf19.5935	"orf19.5935"	CD36_84710	0.353924	0.417415	0.0634911	""
orf19.5934	"orf19.5934"	CD36_84700	0.537069	-2.0585	-2.59556	"S. cerevisiae ortholog TOP3 has DNA topoisomerase type I activity and has role in regulation of DNA recombination, mitotic sister chromatid cohesion, reciprocal meiotic recombination, telomere maintenance via telomerase"
orf19.5933	"orf19.5933"	CD36_84690	-1.77232	-1.63238	0.139942	"Predicted ORF in Assemblies 19, 20 and 21; increased transcription is observed upon benomyl treatment"
orf19.5932	"orf19.5932"	CD36_84680	-0.120553	-0.254992	-0.134439	"Ortholog of S. cerevisiae YLR241W"
orf19.5931	"orf19.5931"	CD36_84670	0.494425	-0.314178	-0.808603	"S. cerevisiae ortholog ARV1 has role in intracellular sterol transport, sphingolipid metabolic process and localizes to endoplasmic reticulum, Golgi apparatus"
orf19.5930	"orf19.5930"	CD36_84660	1.2324	0.299885	-0.932516	""
orf19.593	"FGR32"	CD36_33660	-0.180559	-1.42658	-1.24602	"Protein described as similar to S. cerevisiae Swa2p; induced upon adherence to polystyrene; transposon mutation affects filamentous growth"
orf19.5929	"orf19.5929"	CD36_84650	0.920958	-3.6336	-4.55456	"Putative protein of unknown function, transcription is positively regulated by Tbf1p"
orf19.5928	"RPP2B"	CD36_84640	0.123454	-1.73871	-1.86216	"Conserved acidic ribosomal protein, likely to be involved in regulation of translation elongation; interacts with Rpp1Ap; one of four similar C. albicans ribosomal proteins (Rpp1Ap, Rpp1Bp, Rpp2Ap, Rpp2Bp); macrophage/pseudohyphal-induced"
orf19.5927	"RPS15"	CD36_84630	0.674856	-2.1321	-2.80696	"Putative ribosomal protein; macrophage/pseudohyphal-induced after 16 h; genes encoding cytoplasmic ribosomal subunits, translation factors, and tRNA synthetases are downregulated upon phagocytosis by murine macrophage"
orf19.5926	"ARG11"	CD36_84620	0.800681	-3.45155	-4.25223	"Protein induced during the mating process"
orf19.5925	"orf19.5925"	CD36_84610	0.836305	0.269371	-0.566934	"Ortholog of S. cerevisiae AIM6"
orf19.5924	"ZCF31"	CD36_84590	-0.440475	-2.69327	-2.2528	"Predicted zinc-finger protein of unknown function; null mutant displays sensitivity to copper and SDS, and resistance to Calcofluor White"
orf19.5921	"orf19.5921"	CD36_84580	1.30605	-0.770715	-2.07676	""
orf19.5920	"orf19.5920"	CD36_84570	0.477871	3.42624	2.94837	""
orf19.592	"orf19.592"	CD36_33670	0.112089	0.518722	0.406633	"Ortholog of S. cerevisiae YNL092W"
orf19.5919	"MEA1"	CD36_84560	0.164279	-2.65738	-2.82166	"Protein similar to A. nidulans MesA, which is involved in localization of actin cables"
orf19.5918	"orf19.5918"	NA	1.08793	NA	NA	""
orf19.5917.3	"orf19.5917.3"	CD36_84550	0.417733	-0.590803	-1.00853	"S. cerevisiae ortholog YRA1 has RNA binding, has role in mRNA export from nucleus, transcription-coupled nucleotide-excision repair and localizes to transcription export complex"
orf19.5917	"STP3"	CD36_84540	0.758169	-0.92151	-1.67968	"Transcription factor; regulates SAP2, OPT1 expression and thereby protein catabolism for nitrogen source; activated via amino-acid-induced proteolytic processing; macrophage/pseudohyphal-repressed"
orf19.5915	"orf19.5915"	CD36_84530	-0.896145	1.96791	2.86405	"Putative urea transporter"
orf19.5912	"MAK21"	CD36_84520	-0.675152	-1.57701	-0.901859	"Predicted ORF in Assemblies 19, 20 and 21; mutation confers hypersensitivity to tubercidin (7-deazaadenosine)"
orf19.5911	"CMK1"	CD36_84510	-1.12404	-1.73214	-0.608092	"Expression is regulated upon white-opaque switching; biochemically purified Ca2+/CaM-dependent kinase is soluble, cytosolic, monomeric, and serine-autophosphorylated"
orf19.5910	"orf19.5910"	CD36_84500	-0.348216	-1.95823	-1.61001	"Predicted ORF in Assemblies 19, 20 and 21; induced upon low-level peroxide stress"
orf19.5908	"TEC1"	CD36_84480	1.5309	-1.01118	-2.54208	"TEA/ATTS transcription factor involved in pheromone response pathway in white cells, regulation of hypha-specific genes, wild-type biofilm formation; regulates BCR1; transcription regulated by Cph2p in some conditions; alkaline upregulated"
orf19.5906	"ADE2"	CD36_84460	0.474615	-1.24345	-1.71807	"Phosphoribosylaminoimadazole carboxylase; enzyme of adenine biosynthesis; required for wild-type growth and virulence in immunosuppressed mouse systemic infection; not induced during GCN response, in contrast to S. cerevisiae ortholog"
orf19.5905	"orf19.5905"	CD36_84450	1.34363	1.37898	0.0353462	"Predicted ORF in Assemblies 19, 20 and 21; induced upon biofilm formation"
orf19.5904	"RPL19A"	CD36_84440	0.309793	-2.00148	-2.31127	"Ribosomal protein L19; genes encoding cytoplasmic ribosomal subunits, translation factors, and tRNA synthetases are downregulated upon phagocytosis by murine macrophage"
orf19.5903	"RAX1"	CD36_84430	1.27478	-0.749438	-2.02422	"Protein described as having a possible role in bud site selection; hyphal-induced expression"
orf19.5902	"RAS2"	CD36_84420	-0.736274	1.01901	1.75528	"Protein similar to S. cerevisiae Ras2p, which activates adenylate cyclase and is involved in pseudohyphal growth of S. cerevisiae; transposon mutation affects filamentous growth"
orf19.5901	"PKC1"	CD36_84410	0.365263	-0.859896	-1.22516	"Protein kinase C; functional homolog of S. cerevisiae Pkc1p; mutant has abnormal yeast-form cell morphology and increased cell lysis; activated by phosphatidylserine; target of antifungal, cercosporamide; R400P mutant is activated"
orf19.590	"orf19.590"	CD36_33690	1.16349	0.614405	-0.549082	"Predicted ORF in Assemblies 19, 20 and 21; decreased expression observed in an ssr1 homozygous null mutant; protein detected by mass spec in exponential and stationary phase cultures"
orf19.59	"REI1"	CD36_04780	0.516239	-2.72033	-3.23657	"Predicted ORF in Assemblies 19, 20 and 21; decreased expression in response to prostaglandins"
orf19.5897	"orf19.5897"	CD36_84400	0.736268	-0.397904	-1.13417	"S. cerevisiae ortholog YBL104C localizes to cytoplasm"
orf19.5896	"orf19.5896"	CD36_84390	NaN	NaN	NaN	"Predicted ORF in Assemblies 19, 20 and 21; transcription is induced in response to alpha pheromone in SpiderM medium"
orf19.5894	"orf19.5894"	CD36_84380	-0.382266	-Inf	-Inf	"Ortholog of S. cerevisiae YEL023C"
orf19.5893	"RIP1"	CD36_84370	0.635227	-1.94803	-2.58326	"Putative ubiquinol cytochrome c-reductase; transcriptionally regulated by iron; expression greater in high iron; alkaline downregulated; repressed by nitric oxide"
orf19.5892	"orf19.5892"	CD36_84360	0.750549	1.20207	0.451521	"Ortholog of S. cerevisiae HUL4"
orf19.5890	"orf19.5890"	CD36_84350	0.0921703	-2.5618	-2.65397	""
orf19.589	"VPS21"	CD36_33700	-0.0735826	-0.413636	-0.340054	"Late endosomal Rab small monomeric GTPase involved in transport of endocytosed proteins to the vacuole; involved in filamentous growth and virulence"
orf19.5887	"NUP85"	CD36_84340	0.687296	-1.16455	-1.85185	"S. cerevisiae ortholog NUP85 has role in mRNA export from nucleus, nuclear envelope organization and localizes to Nup107-160 complex"
orf19.5886	"CUP5"	CD36_84330	1.32808	-0.295414	-1.62349	"Predicted ORF in Assemblies 19, 20 and 21; caspofungin repressed"
orf19.5885	"orf19.5885"	CD36_84320	0.724709	-1.55921	-2.28392	"Predicted ORF in Assemblies 19, 20 and 21; flucytosine induced"
orf19.5884	"orf19.5884"	CD36_84310	0.812564	-1.73107	-2.54363	"Predicted ORF in Assemblies 19, 20 and 21; decreased transcription is observed upon benomyl treatment or in an azole-resistant strain that overexpresses MDR1"
orf19.5880	"orf19.5880"	CD36_84300	0.711571	-0.810278	-1.52185	"S. cerevisiae ortholog GEF1 has voltage-gated chloride channel activity and has role in cellular copper ion homeostasis, cellular iron ion homeostasis"
orf19.588	"orf19.588"	CD36_51430	1.29509	2.82644	1.53135	"S. cerevisiae ortholog MIC14 has role in aerobic respiration and localizes to mitochondrial intermembrane space, nucleus"
orf19.5879	"orf19.5879"	CD36_84290	0.62218	0.334583	-0.287597	""
orf19.5877	"ATF1"	CD36_84280	0.521565	-0.628164	-1.14973	"Putative alcohol acetyltransferase; caspofungin repressed; expression depends on Tac1p"
orf19.5876	"orf19.5876"	CD36_84270	0.509808	1.9065	1.3967	"Predicted ORF in Assemblies 19, 20 and 21; greater mRNA abundance observed in a cyr1 homozygous null mutant than in wild type; transcription is induced in response to alpha pheromone in SpiderM medium"
orf19.5875	"VAM3"	CD36_84260	0.289526	-0.733804	-1.02333	"Predicted target membrane receptor (t-SNARE) involved in vacuolar transport, endocytosis, and secretion; required for biofilm formation and virulence"
orf19.5874	"orf19.5874"	CD36_84250	NaN	NaN	NaN	""
orf19.5873	"POL1"	CD36_84240	1.20252	-1.98851	-3.19103	"Protein described as DNA directed DNA polymerase alpha; RNA abundance regulated by cell cycle, tyrosol and cell density"
orf19.5871	"orf19.5871"	CD36_84230	-0.164518	-1.83628	-1.67176	"S. cerevisiae ortholog SNF5 has role in double-strand break repair, nucleosome mobilization, ATP-dependent chromatin remodeling, positive regulation of transcription, DNA-dependent and localizes to SWI/SNF complex"
orf19.5870	"CTP1"	CD36_84210	0.687041	0.86897	0.181929	"Putative citrate transport protein; flucytosine induced; amphotericin B repressed, caspofungin repressed"
orf19.587	"orf19.587"	CD36_51440	0.893609	-0.185804	-1.07941	"S. cerevisiae ortholog TEX1 localizes to transcription export complex"
orf19.5869	"orf19.5869"	CD36_84200	0.883195	1.22184	0.338643	"S. cerevisiae ortholog BSD2 has role in ubiquitin-dependent protein catabolic process, metal ion transport, protein targeting to vacuole and localizes to endoplasmic reticulum, fungal-type vacuole membrane"
orf19.5867	"WSC1"	CD36_84190	-0.786741	-2.3973	-1.61056	"Protein described as a cell wall component; increased mRNA abundance observed in cyr1 homozygous null mutant (yeast-form or hyphal cells)"
orf19.5866	"orf19.5866"	NA	-Inf	NA	NA	"Protein not essential for viability"
orf19.5865	"orf19.5865"	CD36_84180	0.631634	-0.500016	-1.13165	"S. cerevisiae ortholog PRP2 has RNA-dependent ATPase activity, has role in generation of catalytic spliceosome for first transesterification step and localizes to U2-type catalytic step 1 spliceosome"
orf19.5864	"URK1"	CD36_84170	0.738501	-1.91455	-2.65305	"Protein described as similar to uridine kinase; transcription is downregulated in response to treatment with ciclopirox olamine"
orf19.5863	"orf19.5863"	CD36_84160	-1.3288	-0.934065	0.394734	""
orf19.5862	"orf19.5862"	CD36_84150	1.98744	2.22913	0.241691	"Protein described as related to arginases; downregulated upon adherence to polystyrene; regulated by Gcn2p and Gcn4p"
orf19.5861.1	"orf19.5861.1"	NA	1.61773	NA	NA	""
orf19.5861	"KRE9"	CD36_84120	0.0503879	-0.46838	-0.518768	"Protein of beta-1,6-glucan biosynthesis; required for serum-induced hyphal growth; required for efficient utilization of galactose and for growth on glucose; similar to S. cerevisiae Kre9p and Knh1p; O-glycosylated by Pmt1p"
orf19.5860	"orf19.5860"	NA	-0.931921	NA	NA	"Predicted ORF from Assembly 19; removed from Assembly 20; subsequently reinstated in Assembly 21 based on comparative genome analysis"
orf19.586	"ERV46"	CD36_51450	1.32497	-0.187879	-1.51285	"Transcription is induced upon filamentous growth"
orf19.5859	"DAL8"	CD36_84100	1.08755	2.47366	1.38611	"Putative allantoate permease; fungal-specific (no human or murine homolog)"
orf19.5858	"EGD2"	CD36_84080	0.685264	-3.16877	-3.85403	"Putative nascent polypeptide associated complex protein alpha subunit; soluble protein in hyphae; macrophage/pseudohyphal-induced; protein level decreased in stationary phase cultures"
orf19.5857	"orf19.5857"	CD36_84070	-0.810919	-2.43987	-1.62895	""
orf19.5856	"orf19.5856"	CD36_84060	1.05166	1.2275	0.175842	"Membrane-localized protein"
orf19.5855	"MBP1"	CD36_84050	-0.225262	-2.65443	-2.42917	"Predicted ORF in Assemblies 19, 20 and 21; non-periodic mRNA expression; predicted, conserved MBF binding sites upstream of G1/S-regulated genes"
orf19.5854.1	"orf19.5854.1"	NA	-0.00702929	NA	NA	"Ortholog of S. cerevisiae YKR104W"
orf19.5854	"SBP1"	CD36_84020	-0.0406829	0.7222	0.762883	"Similar to RNA binding proteins; downregulated upon adherence to polystyrene; protein detected by mass spec in exponential and stationary phase cultures"
orf19.5852	"orf19.5852"	CD36_30840	-0.185361	-0.449688	-0.264327	""
orf19.5851	"STE13"	CD36_30850	0.157458	-1.75269	-1.91014	"Protein similar to S. cerevisiae Ste13p, which is a pheromone-processing dipeptidyl aminopeptidase; possible Kex2p substrate; transposon mutation affects filamentous growth; induced by low nitrogen, germ tube formation"
orf19.5850	"NOC2"	CD36_30860	-0.359542	-2.73364	-2.3741	"Protein similar to S. cerevisiae Noc2p; transposon mutation affects filamentous growth; mutation confers hypersensitivity to 5-fluorouracil (5-FU), tubercidin (7-deazaadenosine); downregulated during core stress response"
orf19.585	"orf19.585"	CD36_51460	1.40174	-1.83128	-3.23302	"S. cerevisiae ortholog MRPL17 has structural constituent of ribosome and localizes to mitochondrial large ribosomal subunit"
orf19.5849	"CWT1"	CD36_30880	-0.098129	-2.3522	-2.25407	"Putative transcription factor; mutant has cell wall defects; transcription increased at stationary phase; has predicted PAS domain and Zn(II) Cys(6)-type DNA-binding region; similar to S. cerevisiae Rds2p"
orf19.5848	"orf19.5848"	CD36_30890	1.00315	-0.725225	-1.72837	""
orf19.5847	"orf19.5847"	CD36_30900	0.175121	-0.983834	-1.15895	"S. cerevisiae ortholog RET1 has DNA-directed RNA polymerase activity, has role in tRNA transcription from RNA polymerase III promoter and localizes to DNA-directed RNA polymerase III complex"
orf19.5846	"orf19.5846"	CD36_30910	0.737711	-1.87053	-2.60824	"Predicted ORF in Assemblies 19, 20 and 21; possibly an essential gene, disruptants not obtained by UAU1 method"
orf19.5845	"RNR3"	CD36_30920	-0.228916	-3.93485	-3.70594	"Protein described as large subunit of ribonucleotide reductase; transcriptionally regulated by iron; expression greater in low iron"
orf19.5844	"orf19.5844"	CD36_30930	0.411283	-Inf	-Inf	"S. cerevisiae ortholog MEI5 has role in meiotic DNA recombinase assembly, reciprocal meiotic recombination and localizes to condensed nuclear chromosome"
orf19.5843	"orf19.5843"	CD36_30940	2.25423	0.574252	-1.67998	"Predicted ORF in Assemblies 19, 20 and 21; Plc1p-regulated; greater mRNA abundance observed in a cyr1 homozygous null mutant than in wild type"
orf19.5842	"orf19.5842"	NA	-Inf	NA	NA	""
orf19.5841	"orf19.5841"	NA	0.587843	NA	NA	""
orf19.5840	"orf19.5840"	CD36_17700	1.77169	3.70629	1.9346	""
orf19.584	"orf19.584"	CD36_51470	-Inf	-0.495492	Inf	""
orf19.5839	"PDR17"	CD36_17690	1.459	-2.41375	-3.87275	"Predicted ORF in Assemblies 19, 20 and 21; role in sensitivity to fluconazole, specifically; fungal-specific (no human or murine homolog)"
orf19.5838	"orf19.5838"	CD36_17680	1.01957	-2.18826	-3.20782	"S. cerevisiae ortholog SER2 has phosphoserine phosphatase activity, has role in L-serine biosynthetic process and localizes to cytoplasm, nucleus"
orf19.5837	"orf19.5837"	CD36_17670	0.490675	1.2055	0.714827	"S. cerevisiae ortholog ABZ2 has 4-amino-4-deoxychorismate lyase activity, has role in folic acid biosynthetic process and localizes to cytoplasm"
orf19.5835	"orf19.5835"	CD36_17660	0.862535	-1.46496	-2.32749	"S. cerevisiae ortholog RRP7 has role in ribosomal small subunit assembly, rRNA processing and localizes to UTP-C complex, CURI complex"
orf19.5834	"orf19.5834"	CD36_17650	0.309487	-0.845076	-1.15456	"S. cerevisiae ortholog SXM1 has protein transporter activity, has role in mRNA export from nucleus and localizes to cytoplasm, nucleus"
orf19.5833	"orf19.5833"	CD36_17640	0.4715	0.859166	0.387665	"S. cerevisiae ortholog UFD1 has role in protein transport and localizes to Cdc48p-Npl4p-Ufd1p AAA ATPase complex"
orf19.5832	"HPT1"	CD36_17630	0.524956	-0.502101	-1.02706	"Protein abundance is affected by URA3 expression in the CAI-4 strain background; protein level decreased in stationary phase cultures"
orf19.5831	"orf19.5831"	CD36_17620	-0.765336	-1.67586	-0.910521	""
orf19.5830	"orf19.5830"	CD36_17610	0.159137	0.306321	0.147184	"Protein similar to S. cerevisiae Hsp70p; predicted Kex2p substrate; possibly an essential gene, disruptants not obtained by UAU1 method"
orf19.583	"orf19.583"	CD36_51480	-1.10446	-0.912415	0.192049	"Putative indoleamine 2,3-dioxygenase (IDO); IDO is the rate-limiting enzyme of tryptophan catabolism via kynurenine pathway; enzyme inhibition by 1-methyl-D,L-tryptophan causes increased hyphal growth; expressed in yeast cells and hyphae"
orf19.5828	"orf19.5828"	CD36_17600	0.333608	-1.59412	-1.92773	""
orf19.5827	"BUB2"	CD36_17590	1.74771	-2.83945	-4.58716	"S. cerevisiae ortholog BUB2 has role in mitotic cell cycle spindle orientation checkpoint and localizes to spindle pole body"
orf19.5826	"orf19.5826"	CD36_17580	1.16568	0.431809	-0.733874	""
orf19.5825.1	"orf19.5825.1"	CD36_17570	0.529107	-1.1142	-1.64331	"S. cerevisiae ortholog YOS1 has role in ER to Golgi vesicle-mediated transport and localizes to endoplasmic reticulum membrane, integral to Golgi membrane, ER to Golgi transport vesicle"
orf19.5825	"orf19.5825"	CD36_17560	0.0940932	-1.81742	-1.91151	"Predicted ORF in Assemblies 19, 20 and 21; possibly an essential gene, disruptants not obtained by UAU1 method"
orf19.5824	"orf19.5824"	CD36_17550	1.15159	-0.854397	-2.00598	""
orf19.5823	"SGT2"	CD36_17540	0.664488	0.79139	0.126901	"Protein abundance is affected by URA3 expression in the CAI-4 strain background; transcription is regulated by Mig1p"
orf19.5821	"orf19.5821"	CD36_17530	0.293197	0.5899	0.296703	"Ortholog of S. cerevisiae YML002W"
orf19.5820	"UGA6"	CD36_17520	1.09468	-6.61443	-7.70911	"Predicted ORF in Assemblies 19, 20 and 21; decreased transcription is observed upon benomyl treatment or in an azole-resistant strain that overexpresses MDR1"
orf19.5818	"SUR2"	CD36_17510	-1.61914	-2.70227	-1.08313	"Protein described as similar to ceramide hydroxylase; predicted enzyme of sphingolipid biosynthesis; upregulated in biofilm; regulated by Tsa1p, Tsa1Bp under H2O2 stress conditions"
orf19.5817	"orf19.5817"	CD36_17500	0.801138	0.401028	-0.40011	"S. cerevisiae ortholog BET3 has Rab guanyl-nucleotide exchange factor activity, has role in ER to Golgi vesicle-mediated transport and localizes to cis-Golgi network membrane, TRAPP complex"
orf19.5816	"EBP7"	CD36_17490	1.04088	0.0785552	-0.962324	"Predicted ORF in Assemblies 19, 20 and 21; mutation confers hypersensitivity to toxic ergosterol analog; oxidative stress-induced via Cap1p"
orf19.5815	"SCT2"	CD36_17480	-0.13841	1.41979	1.5582	"Putative glycerol-3-phosphate acyltransferase; fungal-specific (no human or murine homolog)"
orf19.5814	"orf19.5814"	CD36_17470	2.14825	1.27588	-0.872365	""
orf19.5813	"orf19.5813"	CD36_17460	-0.40197	0.987809	1.38978	"Predicted ORF in Assemblies 19, 20 and 21; expression upregulated during growth in the mouse cecum"
orf19.5812	"orf19.5812"	CD36_17450	0.114833	0.121445	0.00661215	"S. cerevisiae ortholog YOR051C has role in translational termination and localizes to nucleus"
orf19.5811	"MET1"	CD36_17440	0.186046	-2.57374	-2.75979	"Putative uroporphyrin-3 C-methyltransferase; enzyme of methionine biosynthesis; upregulated in the presence of human whole blood or polymorphonuclear (PMN) cells; Hog1p-induced; fungal-specific (no human or murine homolog)"
orf19.5811	"MET1"	CD36_17440	0.186046	-2.57374	-2.75979	"Putative uroporphyrin-3 C-methyltransferase; enzyme of methionine biosynthesis; upregulated in the presence of human whole blood or polymorphonuclear (PMN) cells; Hog1p-induced; fungal-specific (no human or murine homolog)"
orf19.581	"orf19.581"	CD36_51490	0.0297428	-1.7819	-1.81164	"Putative protein of unknown function, transcription is upregulated in an RHE model of oral candidiasis"
orf19.5809	"orf19.5809"	CD36_17720	0.511685	3.61608	3.1044	"Putative arylformamidase, enzyme of the NAD biosynthesis pathway; Gcn4p-regulated"
orf19.5809	"orf19.5809"	CD36_17430	0.511685	0.761029	0.249344	"Putative arylformamidase, enzyme of the NAD biosynthesis pathway; Gcn4p-regulated"
orf19.5808	"orf19.5808"	CD36_17730	1.9667	-0.27868	-2.24538	"S. cerevisiae ortholog YBR271W localizes to cytoplasm"
orf19.5806	"ALD5"	CD36_17740	0.576283	2.0277	1.45142	"Protein described as an aldehyde dehydrogenase; decreased expression in fluconazole-resistant isolate, or in hyphae; biofilm induced;fluconazole-downregulated; protein abundance is affected by URA3 expression in the CAI-4 strain background"
orf19.5805	"DLD1"	CD36_17750	0.871649	-1.4359	-2.30755	"Putative D-lactate dehydrogenase; transcription is specific to white cell type; shows colony morphology-related gene regulation by Ssn6p; transcription is upregulated in both intermediate and mature biofilms"
orf19.5804	"HYU1"	CD36_17760	0.575199	-1.17272	-1.74792	"Protein described as hydantoin utilization protein A; induced upon adherence to polystyrene; regulated by Gcn2p and Gcn4p"
orf19.5802	"orf19.5802"	CD36_17770	0.331822	-2.90565	-3.23747	"S. cerevisiae ortholog TSR3 has role in maturation of SSU-rRNA and localizes to cytoplasm, nucleus"
orf19.5801	"RNR21"	CD36_17780	1.15623	-3.39201	-4.54824	"Protein described as similar to ribonucleoside-diphosphate reductase; regulated by tyrosol and cell density; transcription is upregulated in response to treatment with ciclopirox olamine; fluconazole or flucytosine induced"
orf19.580	"orf19.580"	CD36_51500	0.334966	-4.38504	-4.72	"Protein not essential for viability"
orf19.58	"RRP6"	CD36_04770	0.325603	-1.8629	-2.1885	"Predicted ORF in Assemblies 19, 20 and 21; mutation confers hypersensitivity to 5-fluorocytosine (5-FC), 5-fluorouracil (5-FU), and tubercidin (7-deazaadenosine)"
orf19.5799	"orf19.5799"	CD36_17790	0.586862	0.345907	-0.240955	""
orf19.5798	"LIG4"	CD36_17800	0.244565	0.113649	-0.130915	"DNA ligase; mRNA detected in yeast-form and pseudohyphal cells, induced upon hyphal induction; suppresses S. cerevisiae ime1-1 mutant IME2 transcription defect; required for wild-type filamentous growth and wild-type pathogenesis"
orf19.5797	"PLC2"	CD36_17810	0.979649	-1.51256	-2.49221	"Phosphatidylinositol (PtdIns)-specific phospholipase C (PI-PLC); predicted type 2 membrane protein; role in, and regulated by, filamentation, Nrg1p and Tup1p; no mouse systemic virulence role; orf19.5797 and orf19.1586 are almost identical"
orf19.5796	"SHE9"	CD36_17820	0.378063	-0.161913	-0.539976	"Protein with similarity to S. cerevisiae She9p, which inhibits growth when overproduced; gene has possible growth-regulation element; fungal-specific (no human or murine homolog)"
orf19.5793	"PR26"	CD36_17830	0.698398	0.670935	-0.0274632	"Protein with similarity to proteasomal 26S regulatory subunit of S. cerevisiae, H. sapiens, Methanobacterium thermoautotrophicum (Archaebacterium)"
orf19.5792	"SMP3"	CD36_17840	1.12479	0.697291	-0.427499	"Mannosyltransferase of glycosylphosphatidylinositol (GPI) biosynthesis; catalyzes mannosylation of Man3-GPI precursor; essential for viability; 8-9 transmembrane regions predicted; has HQEXRF motif; functional homolog of S. cerevisiae Smp3p"
orf19.5791	"IDH2"	CD36_17850	0.955337	0.0221376	-0.9332	"Protein described as isocitrate dehydrogenase subunit; transcription is upregulated in response to treatment with ciclopirox olamine; transcriptionally regulated by iron; expression greater in high iron"
orf19.579	"FOL1"	CD36_51690	0.622587	-0.837163	-1.45975	"Putative dihydroneopterin aldolase (dihydro-6-hydroxymethylpterin pyrophosphokinase); fungal-specific (no human or murine homolog)"
orf19.5789	"ADE8"	CD36_17860	1.18335	0.187976	-0.995369	"Putative phosphoribosylglycinamide formyl-transferase, enzyme of amino acid biosynthesis pathway; upregulated in biofilm; S. cerevisiae ortholog is Gcn4p regulated; protein detected by mass spectometry in stationary phase cultures"
orf19.5788	"EFT2"	CD36_17870	0.65472	-1.36735	-2.02207	"Elongation Factor 2 (eEF2); GTPase; essential; highly expressed; target of sordarin antifungals; antigenic in human, mouse; lacks site for regulatory phosphorylation by eEF2 kinase; GCN-regulated; complements S. cerevisiae eft1 eft2 mutant"
orf19.5785	"orf19.5785"	CD36_17880	-0.939882	-4.98734	-4.04746	"Predicted ORF in Assemblies 19, 20 and 21; greater mRNA abundance observed in a cyr1 or ras1 homozygous null mutant than in wild type; induced by nitric oxide"
orf19.5784	"orf19.5784"	CD36_17890	0.466664	4.63995	4.17328	""
orf19.5783	"orf19.5783"	CD36_17900	0.83874	-1.41596	-2.2547	"Ortholog of S. cerevisiae YOR021C"
orf19.5782	"orf19.5782"	CD36_17910	-0.476381	-2.93824	-2.46185	"S. cerevisiae ortholog YOR022C localizes to mitochondrion"
orf19.5780	"orf19.5780"	CD36_17920	0.321877	0.0835703	-0.238306	"S. cerevisiae ortholog YIL067C localizes to fungal-type vacuole"
orf19.578	"orf19.578"	CD36_51680	0.484431	-1.25907	-1.7435	"S. cerevisiae ortholog MSB3 has Rab GTPase activator activity, has role in actin filament organization and localizes to incipient cellular bud site, polarisome, cellular bud tip"
orf19.5779	"RNR1"	CD36_17930	2.42564	-1.04624	-3.47188	"Protein similar S. cerevisiae Rnr1p, large subunit of ribonucleotide reductase; expression greater in low iron; transposon mutation affects filamentous growth; farnesol upregulated in biofilm; regulated by cell cycle, tyrosol, cell density"
orf19.5777	"orf19.5777"	CD36_17940	1.39336	2.30421	0.910848	"Predicted ORF in Assemblies 19, 20 and 21; induced upon biofilm formation"
orf19.5776	"TOM1"	CD36_17950	-0.361184	-1.69008	-1.3289	"Predicted ORF in Assemblies 19, 20 and 21; transcription is regulated by Nrg1p and Mig1p"
orf19.5775	"orf19.5775"	CD36_64490	0.704642	-1.91609	-2.62073	"Predicted ORF in Assemblies 19, 20 and 21; member of a family encoded by FGR6-related genes in the RB2 repeat sequence"
orf19.5773	"orf19.5773"	CD36_64480	1.03971	-2.25779	-3.2975	"Protein detected by mass spec in exponential and stationary phase cultures; Hog1p-induced; clade-associated gene expression"
orf19.5773	"orf19.5773"	CD36_81860	1.03971	-3.61593	-4.65564	"Protein detected by mass spec in exponential and stationary phase cultures; Hog1p-induced; clade-associated gene expression"
orf19.5772	"orf19.5772"	CD36_64470	0.632252	-0.974832	-1.60708	"S. cerevisiae ortholog SWC5 has role in histone exchange and localizes to Swr1 complex"
orf19.5771	"PBP2"	CD36_64460	0.530916	-1.12598	-1.6569	"Transcription is regulated by Nrg1p, Mig1p, and Tup1p"
orf19.5770	"OPT8"	CD36_64450	0.0253759	-1.97774	-2.00312	"Possible oligopeptide transporter; similar to Opt1p and to S. cerevisiae Ygl114wp, but not other OPTs; induced by nitric oxide, amphotericin B; expression of OPT6, -7, or -8 does not suppress defect of mutant lacking Opt1p, Opt2p, and Opt3p"
orf19.577	"orf19.577"	CD36_50730	1.0913	0.64657	-0.444732	""
orf19.5768	"SNF4"	CD36_64440	0.62143	-0.652212	-1.27364	"Protein similar to S. cerevisiae Snf4p transcriptional regulator; caspofungin repressed; transposon mutation affects filamentous growth"
orf19.5767	"orf19.5767"	CD36_64430	0.497801	-0.580787	-1.07859	"S. cerevisiae ortholog CUS2 has RNA binding and has role in nuclear mRNA splicing, via spliceosome"
orf19.5765	"orf19.5765"	CD36_64420	0.550627	-2.53052	-3.08114	"S. cerevisiae ortholog NUP82 has role in mRNA export from nucleus and localizes to Nup82 complex"
orf19.5764	"SKI8"	CD36_64410	0.604395	0.550649	-0.053746	"Ortholog of S. cerevisiae SKI8"
orf19.5763	"orf19.5763"	CD36_64400	2.06019	5.62727	3.56708	""
orf19.5762	"PGA61"	CD36_64390	-1.85175	-3.46292	-1.61117	"Putative GPI-anchored protein of unknown function"
orf19.5760	"IHD1"	CD36_64370	4.02557	-2.99163	-7.0172	"Putative GPI-anchored protein of unknown function; alkaline upregulated; greater transcription in hyphal form than yeast form; regulated by Nrg1p, Rfg1p, Tup1p; regulated by Tsa1p, Tsa1Bp in minimal media at 37; not essential for viability"
orf19.576	"CTF8"	CD36_50720	2.22625	-Inf	-Inf	"Protein repressed during the mating process"
orf19.5759	"SNQ2"	CD36_64350	-0.412212	-0.631769	-0.219556	"Protein similar to S. cerevisiae Snq2p transporter; member of PDR subfamily of ABC family; transposon mutation affects filamentation; benomyl-induced transcription; detected at yeast-form cell plasma membrane by mass spec"
orf19.5758	"SAL6"	CD36_64340	0.526156	-2.52148	-3.04764	"Putative protein phosphatase of the Type 1 family (serine/threonine-specific), similar to S. cerevisiae Ppq1p; mutant shows virulence defect"
orf19.5757	"orf19.5757"	CD36_64330	0.404489	1.03612	0.631628	"S. cerevisiae ortholog YMR178W localizes to nucleus, cytoplasm"
orf19.5755	"orf19.5755"	CD36_64320	-1.48687	-1.77351	-0.286639	""
orf19.5754	"orf19.5754"	CD36_64310	-0.339329	1.90792	2.24725	"Predicted ORF in Assemblies 19, 20 and 21; fluconazole-induced"
orf19.5753	"HGT10"	CD36_64300	-0.63416	1.79249	2.42665	"Glycerol permease involved in glycerol uptake; member of the major facilitator superfamily; induced by osmotic stress, at low glucose in rich media, during cell wall regeneration; 12 membrane spans"
orf19.5752	"orf19.5752"	CD36_64290	1.07541	1.14263	0.0672186	"S. cerevisiae ortholog SAF1 has ubiquitin-protein ligase activity, has role in SCF-dependent proteasomal ubiquitin-dependent protein catabolic process and localizes to SCF ubiquitin ligase complex"
orf19.5751	"ORM1"	CD36_64280	1.04794	0.49155	-0.556394	"Predicted ORF in Assemblies 19, 20 and 21; mutation confers hypersensitivity to aureobasidin A"
orf19.5750	"SHM2"	CD36_64270	1.26567	0.0414315	-1.22423	"Cytoplasmic serine hydroxymethyltransferase; complements the glycine auxotrophy of an S. cerevisiae shm1 null shm2 null gly1-1 triple mutant; antigenic in human; soluble protein in hyphae; farnesol-upregulated in biofilm"
orf19.575	"HYR3"	CD36_51670	0.246564	-3.27565	-3.52222	"Putative GPI-anchored protein of unknown function; similar to Hyr1p; transcriptionally regulated by iron; expression greater in high iron; clade-specific repeat variation"
orf19.5749	"SBA1"	CD36_64260	0.549658	-0.488351	-1.03801	"Similar to co-chaperones; transcriptionally regulated by iron; expression greater in high iron; farnesol-, heavy metal (cadmium) stress-induced; protein level decreased in stationary phase cultures"
orf19.5748	"orf19.5748"	CD36_64250	-0.606639	0.0633122	0.669951	""
orf19.5747	"orf19.5747"	CD36_64240	1.54979	-1.2319	-2.78169	"S. cerevisiae ortholog MRP4 has structural constituent of ribosome and localizes to mitochondrial small ribosomal subunit"
orf19.5746	"ALA1"	CD36_64230	0.714111	-0.161009	-0.87512	"Alanyl-tRNA synthetase; translational regulation generates cytoplasmic and mitochondrial forms; regulated by Gcn4p; repressed upon amino acid starvation (3-AT); translation-related genes downregulated upon phagocytosis by murine macrophage"
orf19.5742	"ALS9"	CD36_64220	-0.144919	-2.84829	-2.70337	"ALS family protein; expressed during infection of human epithelial cells; confers laminin adhesion to S. cerevisiae; highly variable; ALS family includes cell-surface glycoproteins, some with adhesin function; putative GPI-anchor"
orf19.5741	"ALS1"	CD36_64210	2.69419	-2.75854	-5.45273	"Adhesin; ALS family of cell-surface glycoproteins; adhesion, virulence roles; immunoprotective; in band at hyphal base; amyloid domain; biofilm-induced; Rfg1p, Ssk1p, growth-regulated; strain background affects expression"
orf19.5736	"ALS5"	NA	0.526761	NA	NA	"Adhesin; ALS family protein; highly variable; expression in S. cerevisiae causes adhesion to human epithelium, endothelium or ECM, endothelial invasiveness by endocytosis, and, at high abundance, ECM-induced aggregation; has amyloid domain"
orf19.5735.3	"orf19.5735.3"	NA	-0.57061	NA	NA	""
orf19.5735	"CDC50"	CD36_64200	1.37218	0.877211	-0.494968	"Predicted ORF in Assemblies 19, 20 and 21; transcriptionally activated by Mnl1p under weak acid stress"
orf19.5734	"orf19.5734"	CD36_64190	0.935255	-2.45092	-3.38617	"Putative protein of unknown function; heterozygous null mutant exhibits resistance to parnafungin and cordycepin in the C. albicans fitness test"
orf19.5732	"NOG2"	CD36_64180	0.301047	-1.17927	-1.48031	"Predicted ORF in Assemblies 19, 20 and 21; decreased expression in response to prostaglandins"
orf19.5731	"PAD1"	CD36_64170	-0.555172	-3.48255	-2.92738	"Protein described as phenylacrylic acid decarboxylase; repressed by Rgt1p"
orf19.5730	"orf19.5730"	CD36_64160	0.876576	1.38679	0.510211	"Predicted ORF in Assemblies 19, 20 and 21; clade-associated gene expression"
orf19.5729	"FGR17"	CD36_64150	-0.0985713	-1.84904	-1.75047	"Putative DNA-binding transcription factor; has zinc cluster DNA-binding motif; lacks an ortholog in S. cerevisiae; transposon mutation affects filamentous growth"
orf19.5728	"orf19.5728"	CD36_64140	0.349883	2.88028	2.5304	""
orf19.5727	"orf19.5727"	CD36_64130	0.791969	0.677827	-0.114142	""
orf19.5725	"orf19.5725"	CD36_64120	0.499721	0.486233	-0.0134884	""
orf19.5724	"orf19.5724"	CD36_64110	-Inf	-Inf	NaN	""
orf19.5723	"POX1"	CD36_64100	0.200365	-3.48588	-3.68625	"Predicted acyl-CoA oxidase; expression is regulated upon white-opaque switching; upregulated upon phagocytosis"
orf19.5722	"orf19.5722"	CD36_64090	-0.491194	-1.41031	-0.919114	""
orf19.5720	"orf19.5720"	CD36_64080	0.902477	-0.122142	-1.02462	"Predicted membrane transporter, member of the monocarboxylate porter (MCP) family, major facilitator superfamily (MFS); ketoconazole or caspofungin repressed"
orf19.5719	"orf19.5719"	NA	-0.0473019	NA	NA	"Predicted ORF from Assembly 19; removed from Assembly 20; subsequently reinstated in Assembly 21 and merged with orf19.1020 based on comparative genome analysis"
orf19.5718	"orf19.5718"	CD36_63410	-0.00320341	1.46352	1.46672	""
orf19.5717	"orf19.5717"	NA	-Inf	NA	NA	""
orf19.5716	"SAP4"	NA	1.03902	NA	NA	"Secreted aspartyl proteinase; sap4 sap5 sap6 triple mutant is defective in protein utilization for nitrogen; assessment of virulence role complicated by URA3 effects; expressed during mucosal and systemic infections"
orf19.5714	"SAP1"	CD36_63430	2.21238	6.95797	4.74559	"Secreted aspartyl proteinase; acts in utilization of protein as nitrogen source; assessment of virulence role complicated by URA3 effects; regulated by growth phase, alpha-pheromone; produced by opaque cells"
orf19.5713	"YMX6"	CD36_63450	1.87851	0.319522	-1.55899	"Protein described as NADH dehydrogenase; macrophage-downregulated gene; induced by nitric oxide"
orf19.5711	"orf19.5711"	CD36_63460	0.843307	-1.23131	-2.07462	"Predicted ORF in Assemblies 19, 20 and 21; possibly an essential gene, disruptants not obtained by UAU1 method"
orf19.5710	"orf19.5710"	CD36_63480	0.403506	-2.24408	-2.64758	"Putative protein of unknown function; mRNA binds to She3p"
orf19.5705	"NAM2"	CD36_63510	0.701031	-1.68316	-2.38419	"Putative mitochondrial leucyl-tRNA synthetase"
orf19.5704	"orf19.5704"	CD36_63520	0.455842	-1.81554	-2.27138	"S. cerevisiae ortholog CCM1 has rRNA binding, has role in mitochondrial RNA processing, mitochondrial genome maintenance, rRNA metabolic process and localizes to mitochondrion"
orf19.5702	"orf19.5702"	CD36_63540	0.0556462	-0.637313	-0.692959	""
orf19.5701	"orf19.5701"	CD36_63560	0.551605	-3.38931	-3.94092	""
orf19.5700	"TLO11"	NA	-0.0510599	NA	NA	"Member of a family of telomere-proximal genes of unknown function; may be spliced in vivo"
orf19.570	"IFF8"	CD36_50710	1.13213	-1.39041	-2.52254	"Putative GPI-anchored protein of unknown function; decreased transcription is observed in an azole-resistant strain that overexpresses MDR1"
orf19.57	"PSF2"	CD36_04760	0.62376	0.341052	-0.282708	"S. cerevisiae ortholog PSF2 has role in DNA-dependent DNA replication, double-strand break repair via break-induced replication"
orf19.5698	"orf19.5698"	CD36_50070	1.18742	-3.73401	-4.92143	"Putative ribosomal protein, transcription is upregulated in clinical isolates from HIV+ patients with oral candidiasis"
orf19.5694	"orf19.5694"	NA	0.404503	NA	NA	"Predicted ORF from Assembly 19; removed from Assembly 20; restored based on transcription data"
orf19.5693	"orf19.5693"	CD36_50080	0.497615	-0.535222	-1.03284	"S. cerevisiae ortholog GAA1 has GPI-anchor transamidase activity, has role in attachment of GPI anchor to protein and localizes to GPI-anchor transamidase complex"
orf19.5692	"orf19.5692"	CD36_50100	0.193121	-0.674668	-0.867789	""
orf19.5691	"CDC11"	CD36_50110	1.82744	2.33655	0.50911	"Septin; required for wild-type cell and hyphal morphology, agar-invasive growth, full virulence and kidney tissue invasion in mouse, but not for kidney colonization, immunogenicity; phosphorylation is hyphal- and cell-cycle-regulated"
orf19.5689	"orf19.5689"	CD36_50120	0.993526	1.68765	0.694129	"S. cerevisiae ortholog SEC28 has role in vesicle coating, ER to Golgi vesicle-mediated transport, late endosome to vacuole transport via multivesicular body sorting pathway and localizes to COPI vesicle coat, endosome"
orf19.5688	"orf19.5688"	NA	-0.639142	NA	NA	"Predicted ORF from Assembly 19; removed from Assembly 20; subsequently reinstated in Assembly 21 based on comparative genome analysis"
orf19.5686	"orf19.5686"	CD36_50140	-0.124344	-2.90713	-2.78278	""
orf19.5685	"THS1"	CD36_50150	0.316072	0.0842552	-0.231816	"Putative threonyl-tRNA synthetase; transcription regulated by Mig1p and Tup1p; downregulated upon phagocytosis by murine macrophages; protein detected by mass spec in stationary phase cultures"
orf19.5684.1	"orf19.5684.1"	NA	1.48929	NA	NA	""
orf19.5684	"orf19.5684"	CD36_50160	0.511576	-0.238835	-0.750411	"S. cerevisiae ortholog MRPL38 has structural constituent of ribosome and localizes to mitochondrial large ribosomal subunit"
orf19.5683	"orf19.5683"	CD36_50170	-0.457079	0.155579	0.612658	"Predicted ORF in Assemblies 19, 20 and 21; clade-associated gene expression"
orf19.5682	"orf19.5682"	CD36_50180	0.386167	-0.381413	-0.76758	"S. cerevisiae ortholog SRP1 has protein transporter activity, has role in protein targeting to membrane, protein import into nucleus and localizes to cytoplasm, nuclear exosome (RNase complex), nucleus"
orf19.5681	"orf19.5681"	CD36_50190	-0.0499083	-1.14686	-1.09695	""
orf19.5680	"orf19.5680"	CD36_50200	0.964583	-0.419872	-1.38445	"Predicted ORF in Assemblies 19, 20 and 21; possibly an essential gene, disruptants not obtained by UAU1 method"
orf19.568	"SPE2"	CD36_50700	0.931074	-1.4844	-2.41547	"Predicted ORF in Assemblies 19, 20 and 21; possibly adherence-induced"
orf19.5678	"orf19.5678"	NA	0.479503	NA	NA	"S. cerevisiae ortholog DPH2 has role in peptidyl-diphthamide biosynthetic process from peptidyl-histidine and localizes to cytoplasm"
orf19.5677	"DUR4"	CD36_40540	0.332035	-1.52981	-1.86184	"Putative urea permease; fungal-specific (no human or murine homolog); possibly an essential gene, disruptants not obtained by UAU1 method"
orf19.5676	"orf19.5676"	CD36_40530	-0.215209	-0.897024	-0.681815	"S. cerevisiae ortholog MAG2 localizes to cytoplasm"
orf19.5675	"orf19.5675"	CD36_40520	0.472913	-1.90972	-2.38264	""
orf19.5674	"PGA10"	CD36_40510	-Inf	-0.173563	Inf	"Plasma membrane protein involved in heme-iron utilization; allows utilization of hemin and hemoglobin as iron sources in host tissues; predicted GPI anchor; hypoxia, ketoconazole, ciclopirox, or hyphal-induced; upregulated by Rim101p at pH8"
orf19.5673	"OPT7"	CD36_40500	-1.62145	-5.19593	-3.57448	"Putative oligopeptide transporter; possibly transports GSH and related compounds; induced upon biofilm formation; Hog1p-induced; expression of OPT6, -7, or -8 does not suppress defect of mutant lacking Opt1p, -2p, or -3p; fungal-specific"
orf19.5672	"MEP2"	CD36_40490	0.556223	-Inf	-Inf	"Ammonium permease and regulator of nitrogen starvation-induced filamentation; 11 predicted transmembrane regions; in low nitrogen cytoplasmic C-terminus activates Ras/cAMP and MAPK signal transduction pathways to induce filamentation"
orf19.5672	"MEP2"	CD36_40200	0.556223	-16.3748	-16.931	"Ammonium permease and regulator of nitrogen starvation-induced filamentation; 11 predicted transmembrane regions; in low nitrogen cytoplasmic C-terminus activates Ras/cAMP and MAPK signal transduction pathways to induce filamentation"
orf19.5671	"orf19.5671"	CD36_40480	-0.486068	-1.01245	-0.526381	"S. cerevisiae ortholog SYP1 has role in actin cortical patch assembly, septin cytoskeleton organization and localizes to cellular bud neck, mating projection base, mating projection tip, cellular bud tip"
orf19.567	"TFB3"	CD36_50690	0.23394	-1.00518	-1.23913	"Putative transcription factor with C3HC4 zinc finger DNA-binding motif; transcription is positively regulated by Tbf1p"
[truncated: 4,256 more rows]
